1 **NAD kinase controls antibiotic susceptibility and pathogenic**  
2 **potential in *Staphylococcus aureus***

3

4 **Clarisse Leseigneur<sup>1,2</sup>, Laurent Boucontet<sup>3,4</sup>, Olivier Gorgette<sup>5</sup>, Catherine Thouvenot<sup>5</sup>,**  
5 **Emma Colucci-Guyon<sup>3,4</sup>, Olivier Dussurget<sup>1,2\*</sup>**

6

7 <sup>1</sup>Unité de Recherche *Yersinia*, Institut Pasteur, Paris, France; <sup>2</sup>Université de Paris, Paris,  
8 France; <sup>3</sup>Unité Macrophages et Développement de l'Immunité, Institut Pasteur, Paris, France;  
9 <sup>4</sup>CNRS UMR 3738, Paris, France; <sup>5</sup>Unité Technologie et Service Bioimagerie  
10 Ultrastructurale, Institut Pasteur, Paris, France.

11

12 \*For correspondence: [olivier.dussurget@pasteur.fr](mailto:olivier.dussurget@pasteur.fr)

13

14 **Abstract**

15

16 Nicotinamide adenine dinucleotide phosphate (NADPH) is the primary electron donor for  
17 reductive reactions that are essential for the biosynthesis of major cell components in all  
18 organisms. Nicotinamide adenine dinucleotide kinase (NADK) is the only enzyme that  
19 catalyzes synthesis of NADP(H) from NAD(H). While the enzymatic properties and  
20 physiological functions of NADK have been thoroughly studied, the role of NADK in  
21 bacterial pathogenesis remains unknown. Here, we used CRISPR interference to knockdown  
22 NADK gene expression in order to address the role of NADK in *Staphylococcus aureus*  
23 pathogenic potential. We find that NADK protects bacteria from antimicrobial defense  
24 mechanisms encountered in the host during infection such as oxidative and envelope stresses.  
25 Furthermore, we show that antioxidant properties of NADK promote *S. aureus* survival in  
26 infected macrophages. Remarkably, NADK inhibition drastically decreases mortality of  
27 zebrafish infected with *S. aureus*. These findings support a key role for NADK in bacteria  
28 interactions with innate immune cells and during infection. Last, we reveal that decreasing  
29 NADK expression increases *S. aureus* susceptibility to antibiotics, opening the way to  
30 development of synergistic treatments based on NADK inhibitors and current antibiotics.

31

32

33

## 34 **Introduction**

35 Nicotinamide adenine dinucleotide (NAD<sup>+</sup>), its phosphorylated form (NADP<sup>+</sup>) and their  
36 reduced equivalents (NADH and NADPH) are essential cofactors shared by all living  
37 organisms. While NAD<sup>+</sup> and NADH are important for cellular energy metabolism,  
38 inflammation and senescence (Chini et al., 2021; Covarrubias et al., 2021), NADP<sup>+</sup> and  
39 NADPH are key cofactors in central metabolism, being involved in tricarboxylic acid (TCA)  
40 cycle, pentose phosphate pathway as well as *de novo* synthesis of fatty acids, cholesterol,  
41 amino acids and nucleotides (Chandel, 2021). NADPH also provides the reducing power  
42 necessary for the restoration of antioxidative defense systems of the cell (Chandel, 2021).  
43 Like NAD(H), growing evidence suggests that NADP(H) has a broader role. In particular, the  
44 NADP<sup>+</sup> derivative nicotinic acid adenine dinucleotide phosphate (NAADP), which is the  
45 major intracellular calcium mobilizing molecule, links NADP(H) metabolism with calcium  
46 homeostasis and signaling, development and differentiation (Galione and Chuang, 2020).

47       Whereas there are two known multi-step pathways for NAD<sup>+</sup> biosynthesis, a single  
48 enzyme is responsible for the phosphorylation of NAD<sup>+</sup>/NADH into NADP<sup>+</sup>/NADPH: the  
49 NAD kinase (NADK) (McGuinness and Butler, 1985; Chini et al., 2021). NADK activity was  
50 first reported in the late 30's (Vestin, 1937; Von Euler and Adler, 1938), and the enzyme was  
51 purified from yeast by Kornberg in 1950 (Kornberg, 1950). It is only in 2000 that the genes  
52 encoding NADK were identified in *Micrococcus flavus* and *Mycobacterium tuberculosis*  
53 (Kawai et al., 2000). Since then, NADK genes have been identified in all living organisms,  
54 except the intracellular parasitic bacteria *Chlamydia* spp. on the basis of genome annotation  
55 (Grose et al., 2006; Fisher et al. 2013). Given the vital role of NADPH, notably during  
56 oxidative stress, NADK genes have been shown to be essential for growth of several bacteria,  
57 such as *Mycobacterium tuberculosis* (Sasseti et al., 2003), *Bacillus subtilis* (Kobayashi et al.,  
58 2003), *Salmonella enterica* (Grose et al., 2006) and *Staphylococcus aureus* (Chaudhuri et al.,

59 2009; Gelin et al., 2020). NADKs essentiality may account for the poor characterization of  
60 their role in prokaryotes. In contrast, NADKs have been extensively studied in plants (Li et  
61 al., 2018), especially in *Arabidopsis thaliana* which possesses three NADK encoding genes  
62 (Chai et al., 2006; Turner et al., 2004). NADK has a key role in photosynthesis, plant cell  
63 metabolism, intracellular redox balance (Li, 2018), and response to stresses as shown during  
64 exposure to aluminum in wheat (Ślaski, 1995), upon cold-shock in green bean leaves (Ruiz et  
65 al., 2002), upon treatment with NaCl, ionizing radiations or oxidative stress in *Arabidopsis*  
66 *thaliana* (Chai et al., 2006; Berrin et al., 2005).

67 In plants, NADKs are mainly regulated by calcium and calmodulin (Tai et al., 2019).  
68 In fact, NADK from peas extract has been historically used as a tool to examine calmodulin  
69 activity in proteins (Muto and Miyachi, 1977). In higher plants, activation of NADK was  
70 shown to be dependent on Ca<sup>2+</sup>-dependent calmodulin complex formation and was inhibited  
71 by calcium chelation using EGTA (Jarrett et al., 1980). Some NADKs are regulated by direct  
72 interactions with Ca<sup>2+</sup>-dependent calmodulins through their calmodulin-binding domains  
73 (Turner et al., 2004). Other NADKs have been proposed to be indirectly regulated through a  
74 Ca<sup>2+</sup>/calmodulin-mediated kinase cascade (Love et al., 2015) and some NADK isoforms are  
75 calmodulin independent (Simon et al., 1982). In contrast, in prokaryotes allosteric regulation  
76 of NADK activity by NADPH or NADH is the only mechanism identified so far (Grose et al.,  
77 2006).

78 The importance of microbial metabolic adaptation during infection (Eisenreich et al.,  
79 2010; Richardson, 2019; Teoh et al., 2021) and the unknown contribution of NADK to  
80 bacterial pathogenesis prompted us to investigate the role of NADK in *Staphylococcus*  
81 *aureus*. While being carried as a commensal by around one third of the human population, *S.*  
82 *aureus* is a leading cause of infectious diseases, ranging from mild skin and soft tissue  
83 infections to life-threatening endocarditis and bacteremia (Turner et al., 2019). Worryingly, *S.*

84 *aureus* can develop resistance to virtually all antibiotic classes available (Vestergaard et al.,  
85 2019), limiting dramatically therapeutic options for some patients. Therefore, WHO included  
86 *S. aureus* in the list of high priority pathogens to promote research and development of new  
87 antibiotics and emphasized the need for innovation and diversification in the choice of targets  
88 ([https://www.who.int/news/item/27-02-2017-who-publishes-list-of-bacteria-for-which-new-](https://www.who.int/news/item/27-02-2017-who-publishes-list-of-bacteria-for-which-new-antibiotics-are-urgently-needed)  
89 [antibiotics-are-urgently-needed](https://www.who.int/news/item/27-02-2017-who-publishes-list-of-bacteria-for-which-new-antibiotics-are-urgently-needed)).

90 In this study, we used a genetic approach to modulate NADK activity and study *S.*  
91 *aureus* behavior in response to stresses mimicking those encountered during infection and  
92 antibacterial treatment. We show that exposures to oxidative, envelope or antibiotic-mediated  
93 stresses significantly decrease bacterial survival upon inhibition of NADK activity.  
94 Importantly, we demonstrate that inhibition of NADK leads to a dramatic decrease of *S.*  
95 *aureus* survival in a macrophage infection model, highlighting its role during interactions  
96 with immune cells. Finally, we establish the first link between NADK activity and *S. aureus*  
97 pathogenic potential, as NADK inhibition led to an increased survival of the host in a  
98 zebrafish infection model.

## 99 Results

### 100 *S. aureus* *ppnK* gene encoding NADK is part of the *relQ* operon

101 As most prokaryotes, *S. aureus* possesses a single NADK encoded by the highly conserved  
102 *ppnK* gene. To investigate expression of the *ppnK* genomic locus, we carried out RT-PCR on  
103 RNA purified from *S. aureus* Xen36 strain during exponential growth in BHI broth at 37°C.  
104 Cotranscript analysis revealed that *ppnK* belongs to the *relQ* operon (Figure 1, Figure  
105 supplement 1). The *relQ* gene is one of the three genes responsible for synthesis of the  
106 (p)ppGpp alarmones and synthesizes also the third alarmone pGpp. In addition the operon  
107 contains genes encoding a small hypothetical protein (00941), a pseudouridine synthase  
108 (00944), a putative magnesium transporter (00945) and a Na<sup>+</sup>/H<sup>+</sup> antiporter-like protein  
109 (00946). Remarkably, synteny analysis showed that three genes of the *S. aureus* *relQ* operon,  
110 *i.e.* *relQ*, *ppnK* and 00944, are conserved among *Bacilli* (Figure 1). This confirmed the  
111 importance of these genes and raised the possibility of a functional connection, in particular in  
112 adaptation to stress and pathogenesis.

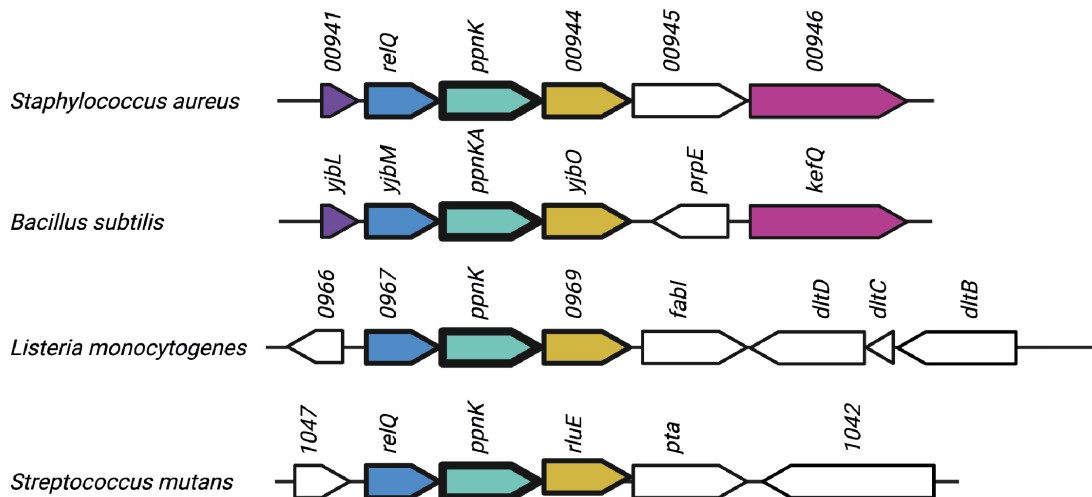

114 **Figure 1.** The *ppnK* genomic locus is conserved in *Bacilli*. Comparative analysis of the *ppnK* genomic locus of *S. aureus*  
115 NCTC8325, *Bacillus subtilis* 168, *Listeria monocytogenes* EGDe and *Streptococcus mutans* UA159 was performed using  
116 SyntTax. Arrows of the same color represent orthologs.

117

## 118 NADK protects *S. aureus* from hydrogen peroxide toxicity

119 To investigate the role of NADK in *S. aureus* stress response and pathogenesis, we took a  
120 genetic approach to modulate the expression of *ppnK*. We used the *S. aureus* Xen36/NADK  
121 sgRNA strain in which the levels of *ppnK* expression were decreased by CRISPR-based  
122 interference (Gelin et al., 2020). Knockdown of NADK expression in this strain was verified  
123 by RT-PCR, immunoblotting and aerobic growth in BHI at 37°C (Figure supplement 2). An  
124 important host defense encountered by bacteria during infection is the production of toxic  
125 levels of reactive oxygen species (ROS) (Avican et al., 2021; Fang et al., 2016). We therefore  
126 compared growth of the *S. aureus* strain containing the empty vector to that of the NADK  
127 knockdown strain, upon exposure to increasing concentrations of hydrogen peroxide (H<sub>2</sub>O<sub>2</sub>).  
128 While the Xen36/pSD1 strain resisted to high doses of H<sub>2</sub>O<sub>2</sub>, the Xen36/NADK sgRNA strain  
129 showed increasing growth deficiency when exposed to H<sub>2</sub>O<sub>2</sub> concentrations ranging from 50  
130 to 500 µM H<sub>2</sub>O<sub>2</sub> (Figure 2A). Expectedly, treatment of the Xen36/pSD1 strain with catalase  
131 alone or catalase and H<sub>2</sub>O<sub>2</sub> did not affect growth (Figure 2B). In contrast, addition of catalase,  
132 which catalyzes hydrogen peroxide dismutation into water and oxygen, rescued the growth  
133 defect of the Xen36/NADK sgRNA strain upon H<sub>2</sub>O<sub>2</sub> treatment (Figure 2B). Taken together,  
134 our results show that NADK protects *S. aureus* from toxic effects of a reactive oxygen species  
135 involved in host defense.

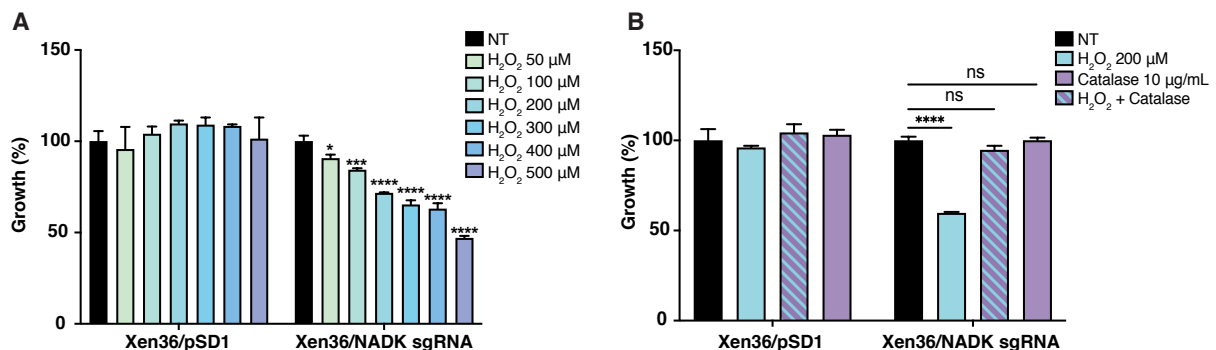

136  
137 **Figure 2** NADK protects *S. aureus* from hydrogen peroxide toxicity. Bacterial growth was monitored at OD<sub>600nm</sub> in BHI  
138 broth at 37°C. (A) Percentage of growth of the *S. aureus* strain containing the empty vector (Xen36/pSD1) and the *ppnK*  
139 knock-down strain (Xen36/NADK sgRNA) exposed for 6 hours to increasing concentrations of H<sub>2</sub>O<sub>2</sub> relative to the untreated

140 condition (NT). (B) Percentage of growth of the *S. aureus* strain containing the empty vector (Xen36/pSD1) and the *ppnK*  
141 knockdown strain (Xen36/NADK sgRNA) exposed for 6 hours to H<sub>2</sub>O<sub>2</sub> and catalase alone or in combination, relative to the  
142 untreated condition (NT). Data shown are representative of three independent experiments. Bars indicate the standard error of  
143 the means of biological replicates (n=3). Comparison of data was performed using one-way analysis of variance (ns:  
144 nonsignificant, \*p<0.05, \*\*\*p<0.001, \*\*\*\*p<0.0001).

145

## 146 **NADK protects *S. aureus* from envelope stress**

147 Within the infected host, bacteria have to cope with multiple sources of envelope stress, such  
148 as bile salts, cationic antimicrobial peptides and osmotic stress (Avican et al., 2021; Fang et  
149 al., 2016). We therefore investigated the effects of NADK knockdown on *S. aureus* sensitivity  
150 to envelope stress. First we treated Xen36/pSD1 and Xen36/NADK sgRNA strains with  
151 triclosan, a membranotropic antibacterial agent and an inhibitor of FabI, an enoyl-ACP  
152 reductase implicated in the last step of bacterial fatty acid elongation (Guillén et al., 2004; Lu  
153 and Tonge, 2008). Xen36/NADK sgRNA displayed a higher susceptibility to 0.5 nM triclosan  
154 treatment compared to Xen36/pSD1 (Figure 3A). At nanomolar concentration and above,  
155 triclosan inhibited growth of both strains. Unexpectedly, catalase treatment rescued the  
156 growth defect of the *ppnK* knockdown strain upon exposure to 0.75 nM triclosan, suggesting  
157 a contribution of ROS in the antibacterial effect (Figure 3B). Next, we investigate the role of  
158 NADK in response to osmotic stress upon addition of NaCl to the broth. Xen36/NADK  
159 sgRNA was more sensitive to NaCl treatment than the Xen36/pSD1 strain at concentrations  
160 of 4% and above (Figure 3C). In contrast to triclosan, catalase treatment failed to rescue  
161 bacterial survival at 4% NaCl (Figure 3D), suggesting an H<sub>2</sub>O<sub>2</sub>-independent antibacterial  
162 effect in our experimental conditions. Interestingly, using electron microscopy, we observed  
163 that NADK inhibition led to membrane permeabilization and cytoplasmic content leakage  
164 (Figure supplement 2D). Together, these results show that NADK contributes to *S. aureus*  
165 envelope integrity upon stress.

166



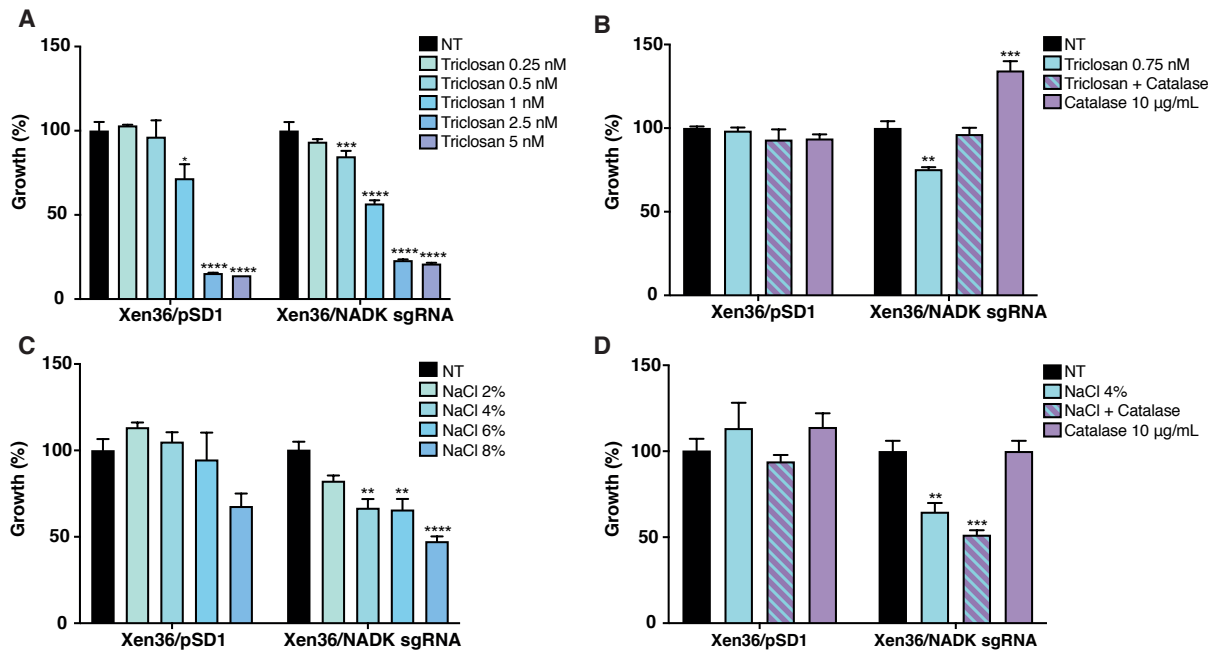

167

168

169

170

171

172

173

174

175

176

177

178

179

180

### 181 NADK controls antibiotic susceptibility

182

183

184

185

186

187

188

189

190

**Figure 3** NADK protects *S. aureus* from envelope stress. Bacterial growth was monitored at OD<sub>600nm</sub> in BHI broth at 37°C. (A) Percentage of growth of the *S. aureus* strain containing the empty vector (Xen36/pSD1) and the *ppnK* knock-down strain (Xen36/NADK sgRNA) exposed for 6 hours to increasing concentrations of triclosan relative to the untreated condition (NT). (B) Percentage of growth of the *S. aureus* strain containing the empty vector (Xen36/pSD1) and the *ppnK* knockdown strain (Xen36/NADK sgRNA) exposed for 6 hours to triclosan and catalase alone or in combination, relative to the untreated condition (NT). (C) Percentage of growth of the *S. aureus* strain containing the empty vector (Xen36/pSD1) and the *ppnK* knockdown strain (Xen36/NADK sgRNA) exposed for 6 hours to increasing concentrations of NaCl relative to the untreated condition (NT). (D) Percentage of growth of the *S. aureus* strain containing the empty vector (Xen36/pSD1) and the *ppnK* knockdown strain (Xen36/NADK sgRNA) exposed for 6 hours to NaCl and catalase alone or in combination, relative to the untreated condition (NT). Data shown are representative of three independent experiments. Bars indicate the standard error of the means of biological replicates (n=3). Comparison of data was performed using one-way analysis of variance (ns: nonsignificant, \*p<0.05, \*\*p<0.01, \*\*\*p<0.001, \*\*\*\*p<0.0001).

It has been proposed that all bactericidal antibiotics kill bacteria through ROS production. Although it is a controversial issue, evidences support that some antibiotics such as aminoglycosides, fluoroquinolones and  $\beta$ -lactam antibiotics might activate the TCA cycle, leading to hyperactivation of the electron transport chain and superoxide radicals formation (Van Acker and Coenye, 2017; Baquero and Levin, 2021). In addition, several antibiotic

187 classes target the bacterial envelope (Baquero and Levin, 2021). As NADK protects *S. aureus*  
188 from oxidative stress (Figure 2) and envelope stress (Figure 3), we wondered if *ppnK*  
189 knockdown might impact bacterial survival under antibiotic-induced stress. To test this  
190 hypothesis, we treated Xen36/pSD1 with subinhibitory concentrations of antibiotics of several  
191 classes and compared its growth to that of the Xen36/NADK sgRNA strain. We first used  
192 polymyxin B, an amphipatic cyclic lipopeptide disrupting bacterial membranes. As expected,  
193 a concentration of polymyxin B as high as 40  $\mu\text{g/mL}$  did not inhibit growth of the  
194 Xen36/pSD1 strain (Figure 4A), *S. aureus* being notoriously resistant to polymyxins  
195 (Vestergaard et al., 2017). In contrast, the Xen36/NADK sgRNA was susceptible to  
196 polymyxin B in a ROS-dependent manner (Figure 4A). We then tested the effect of NADK  
197 know-down on sensitivity to all the other major classes of antibiotics. Strikingly, the  
198 Xen36/NADK sgRNA strain was susceptible to levofloxacin, a DNA gyrase and  
199 topoisomerase IV inhibitor (Figure 4B), kanamycin, a protein synthesis inhibitor (Figure 4C)  
200 and rifampicin, an RNA polymerase inhibitor (Figure 4D). Similarly to polymyxin B,  
201 treatment with catalase alleviated toxicity of these three antibiotics (Figures 4A-D). The  
202 knockdown of *ppnK* also led to decreased bacterial growth in the presence of vancomycin,  
203 which inhibits peptidoglycan biosynthesis. However, catalase was unable to restore growth to  
204 the level of non-treated bacteria, indicating that the growth defect was not due to ROS  
205 production. Together, these results show that NADK activity controls antibiotics  
206 susceptibility in ROS-dependent and ROS-independent manner.

207

208

209

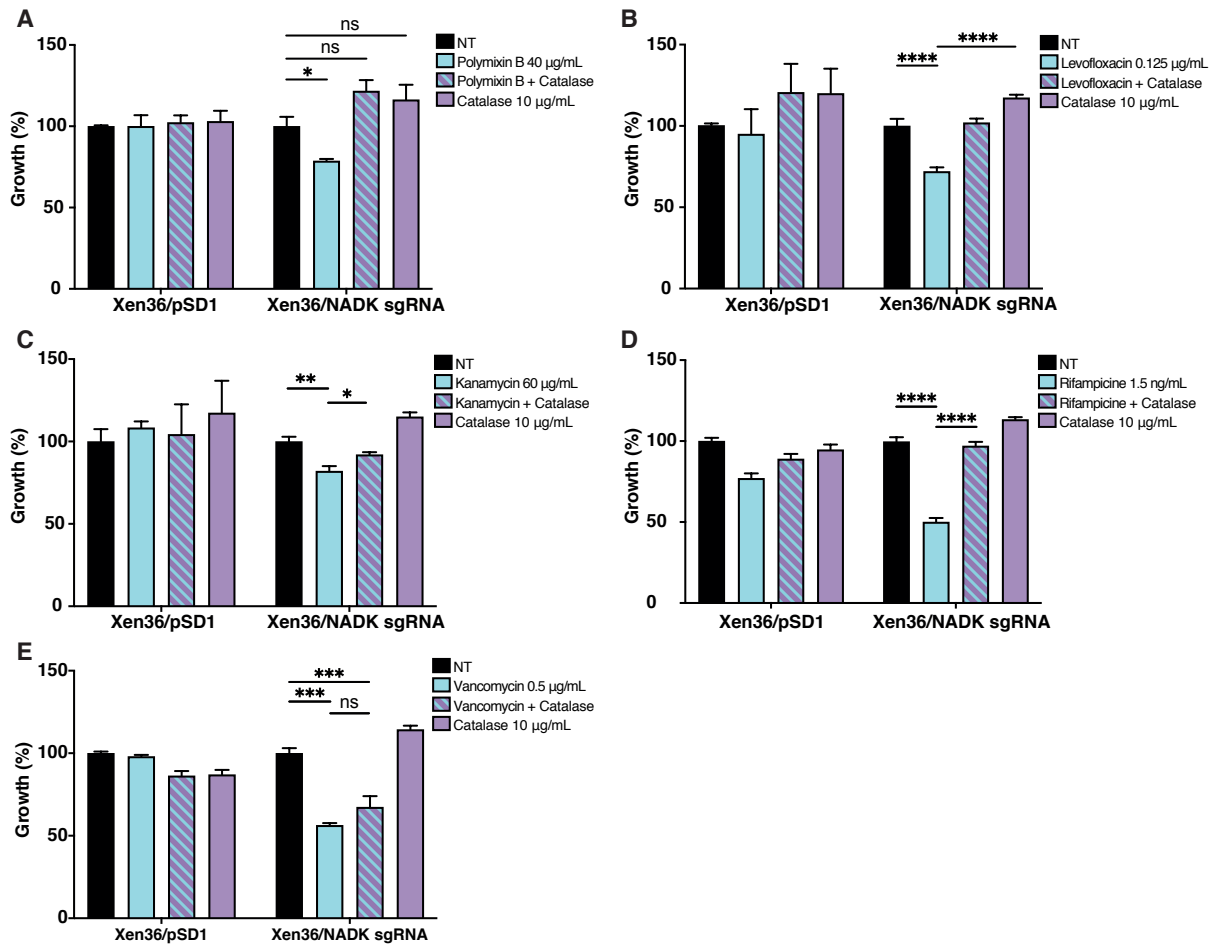

210

211 **Figure 4** NADK controls antibiotic susceptibility. Bacterial growth was monitored at OD<sub>600nm</sub> in BHI broth at 37°C. (A-E)  
 212 Percentage of growth of the *S. aureus* strain containing the empty vector (Xen36/pSD1) and the *ppnK* knock-down strain  
 213 (Xen36/NADK sgRNA) exposed to polymyxin B (A), levofloxacin (B), kanamycin (C), rifampicin (D), vancomycin (E) with  
 214 and without catalase for 6 hours relative to the untreated condition (NT). Data shown are representative of three independent  
 215 experiments. Bars indicate the standard error of the means of biological replicates (=3). Comparison of data was performed  
 216 using one-way analysis of variance (ns: nonsignificant, \*p<0.05, \*\*p<0.01, \*\*\*p<0.001, \*\*\*\*p<0.0001).

217

## 218 **NADK promotes *S. aureus* survival in macrophages**

219 Since ROS production is a major antibacterial mechanism of key immune cells such as  
 220 phagocytes, we next investigated if *ppnK* knockdown might impair *S. aureus* survival during  
 221 macrophages infection. Murine RAW264.7 macrophages were infected with Xen36/pSD1 or  
 222 Xen36/NADK sgRNA strains. Bacterial enumerations were performed at time zero and 1, 2, 4  
 223 and 6 hours post infection. No significant difference in phagocytosis of the two strains could  
 224 be observed, nor at early time of infection (Figure 5A). In contrast, after 2 hours of infection

225 the percentage of intracellular bacteria was significantly reduced upon *ppnK* knockdown, and  
226 the survival defect increased over time (Figure 5A), indicating that bacteria were not able to  
227 survive inside macrophages without proper NADK activity. We next investigated the role of  
228 ROS production by macrophages in the control of the Xen36/NADK sgRNA strain using the  
229 antioxidant agent N-acetyl cysteine (NAC). NAC partially restored bacterial survival (Figure  
230 5A), indicating that the bacterial growth defect of the *ppnK* knockdown strain was in part due  
231 to its inability to cope with oxidative stress. Using fluorescence microscopy, we then  
232 investigated bacterial localization in macrophages 6 hours post-infection. Few Xen36/NADK  
233 sgRNA bacteria were detected compared to Xen36/pSD1 (Figure 5B), and NAC treatment led  
234 to an increased number of bacteria (Figure 5C), confirming bacterial enumeration results.  
235 Interestingly, while all knockdown bacteria colocalized with LAMP1, many Xen36/pSD1  
236 bacteria did not upon NAC treatment, suggesting that NADK activity might be required for  
237 phagolysosome escape and bacterial survival in macrophages.

238

239

240

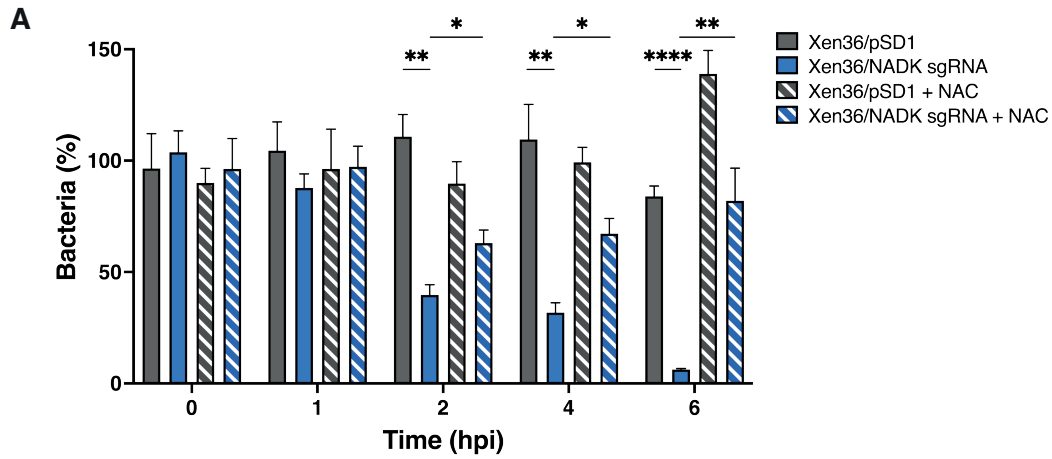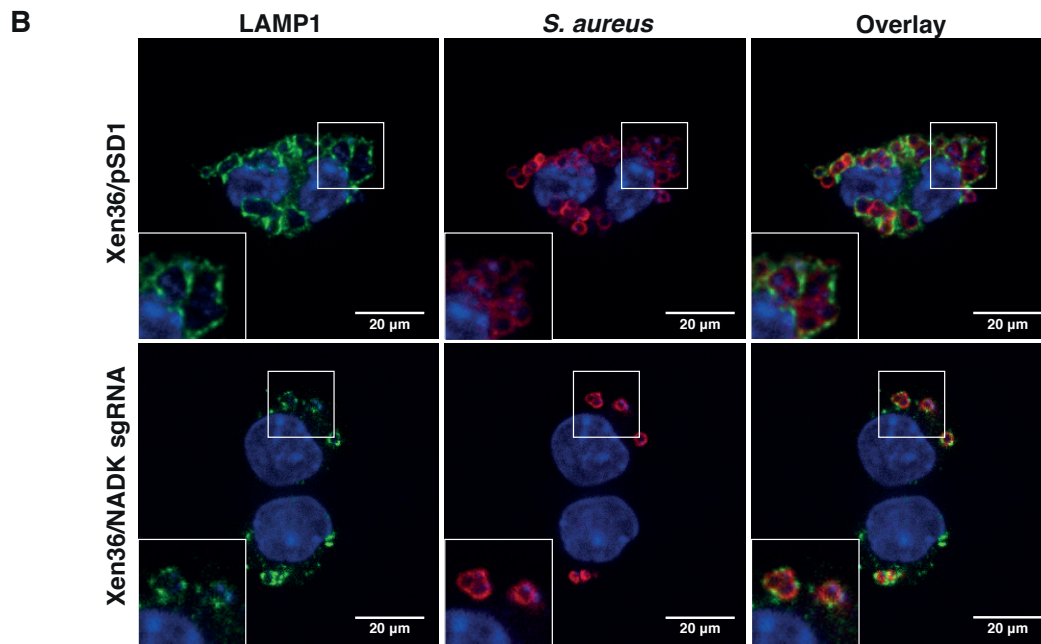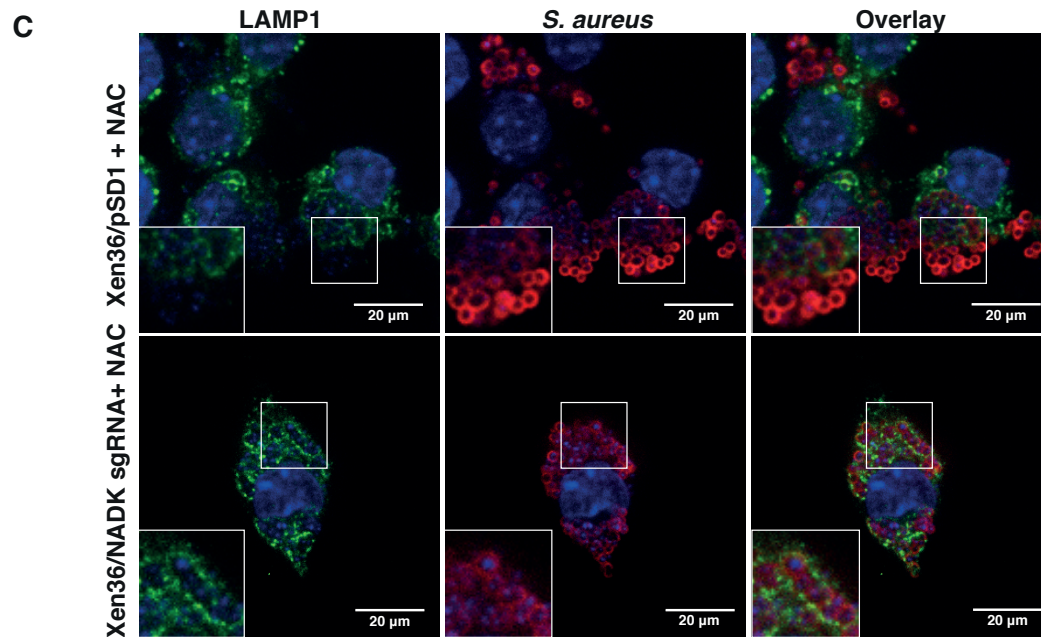

242 **Figure 5** NADK promotes *S. aureus* survival in macrophages. (A) Percentage of growth of the *S. aureus* strain containing the  
243 empty vector (Xen36/pSD1) and the *ppnK* knock-down strain (Xen36/NADK sgRNA) at 0, 1, 2, 4 and 6 hours post-infection  
244 (hpi) of RAW264.7 macrophages left untreated or treated with N-acetylcysteine (NAC). Bars indicate standard errors of the  
245 means of biological replicates (n=4). Comparison of data was performed using two-ways analysis of variance (\*p<0.05,  
246 \*\*p<0.01, \*\*\*\*p<0.0001). (B-C) RAW264.7 macrophages were infected with Xen36/pSD1 or Xen36/NADK sgRNA and  
247 analyzed 6 hours post-infection by fluorescence microscopy using antibodies to label LAMP1 (FITC, green) and *S. aureus*  
248 (Cy5, red). Nuclei were labeled with DAPI (blue). B shows untreated macrophages. C shows macrophages treated with NAC.  
249 Images are representative of three independent experiments.

250

### 251 **NADK promotes *S. aureus* virulence in zebrafish**

252 Since phagocytes play a critical role in host defense against bacterial infection, we  
253 investigated whether NADK inhibition might influence *S. aureus* pathogenesis in a zebrafish  
254 infection model. This model allows short kinetics of infection (Prajsnar et al., 2008) and has  
255 been previously used to study *S. aureus* infection dynamics (Prajsnar et al., 2012). In addition  
256 to being optically transparent, zebrafish larvae innate immune system is the only one  
257 operating during the first days of development, facilitating the study of interactions between  
258 bacteria and neutrophils or macrophages. We first determined the stability of the pSD1  
259 plasmid during infection. Zebrafish larvae were infected at 60 hours post fertilization (hpf) by  
260 intravenous injections of either the Xen36/pSD1 or Xen36/NADK sgRNA strains. Bacteria  
261 recovered from infected larvae were plated onto BHI agar with and without chloramphenicol.  
262 There was no significant difference between the number of bacteria growing on BHI alone  
263 and BHI supplemented with chloramphenicol up to 48 hours post-infection, irrespective of the  
264 strain (Figure supplement 3). Thus, plasmids were maintained in our experimental infection  
265 conditions. We next monitored zebrafish survival upon infection with  $10^4$  bacteria.  
266 Xen36/pSD1 infection led to  $\approx 75\%$  fish mortality at 24 hours post infection (Figure 6A).  
267 Strikingly, only one larva out of 48 died when bacterial NADK was inhibited (Figure 6A).  
268 Decreased fish mortality upon Xen36/NADK sgRNA infection was also observed 48 and 72

269 hours post-infection (Figure 6A). These results indicate that NADK inhibition leads to a  
270 decreased bacterial virulence. We then determined the bacterial burden of fish larvae 24 and  
271 48 hours post-infection. Interestingly, we recovered similar amount of Xen36/pSD1 and  
272 Xen36/NADK sgRNA strains at both time points (Figure 6B), suggesting that NADK  
273 contributes to *S. aureus* pathogenic potential, which depends on both bacterial and host  
274 factors. As observed previously by Prajsnar et al. (Prajsnar et al., 2012), some fishes were  
275 able to control the infection with  $10^4$  bacteria but a high bacterial burden was associated with  
276 larval death in most cases (Figure 6B). In order to investigate the impact of NADK inhibition  
277 on phagocyte populations, we infected intravenously transgenic zebrafish lines with  
278 Xen36/pSD1 or Xen36/NADK sgRNA strains, and observed macrophages  
279 (Tg(*mfap4::mCherryF*)) and neutrophils (Tg(*mpx::GFP*)) 24 hours post-infection.  
280 Macrophages recruitment at the site of infection was observed for both strains (Figure 6C).  
281 We also noticed a strong depletion of neutrophils in larvae infected with Xen36/pSD1, while  
282 this neutropenia was more limited upon infection with NADK knockdown bacteria (Figure  
283 6C). This correlated with the virulence differences of the two strains, given the key role of  
284 neutrophils in *S. aureus* infection (Pollitt et al., 2018; Prajsnar et al., 2012). Altogether, our  
285 results suggest that NADK is important for *S. aureus* pathogenesis.

286

287

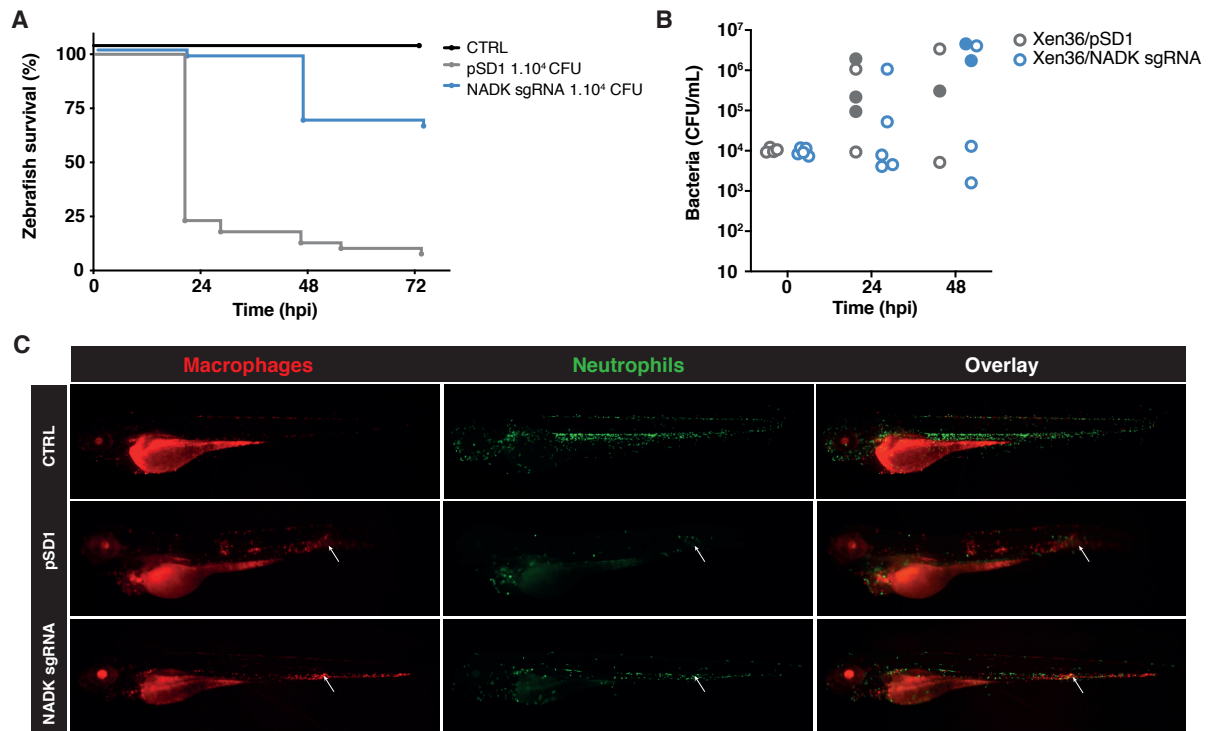

288

289 **Figure 6** NADK contributes to *S. aureus* pathogenic potential in zebrafish. (A) Survival of zebrafish larvae intravenously  
290 injected at 60 hpf with 10<sup>4</sup> Xen36/pSD1 or Xen36/NADK sgRNA *S. aureus* (n=48). (B) Growth of Xen36/pSD1 or  
291 Xen36/NADK sgRNA *S. aureus* in zebrafish larvae upon intravenous injection with 10<sup>4</sup> bacteria. For each strain, CFU were  
292 determined in living larvae (open circles) or dead larvae (filled circles) 24 and 48 hours post-infection. (C) Homozygous Tg  
293 (*mfap4::mCherryF*) (*ump6Tg*) Tg(*mpx::GFP*) double transgenic fishes were infected intravenously with 10<sup>4</sup> Xen36/pSD1 or  
294 Xen36/NADK sgRNA *S. aureus* (arrows indicate the injection site). Macrophages (mCherry, red) and neutrophils (GFP,  
295 green) were imaged 24 hours post-infection.

296

## 297 Discussion

298 The ability of *S. aureus* to survive and thrive in a wide variety of niches during infection,  
299 ranging from skin to deeper tissues and abiotic devices, mirrors highly plastic metabolic  
300 capacities allowing adaptive responses to constantly changing microenvironments (Potter et  
301 al., 2020). Metabolic pathways are not only necessary for nutrient acquisition to sustain  
302 bacterial growth, but also for regulation of virulence and are therefore central to host-  
303 pathogen interactions (Eisenreich et al., 2010; Harper et al., 2018; Richardson, 2019; Teoh et  
304 al., 2021; Tomlinson et al., 2021).



305 Here we show for the first time that NADK contributes to bacterial pathogenic  
306 potential. NADK was necessary for successful *S. aureus* infection, ultimately leading to  
307 neutropenia and death of zebrafish larvae. Decreasing NADK activity led to decreased host  
308 mortality without affecting bacterial burden, suggesting that NADK promotes virulence factor  
309 activity and/or counteracts host defenses independently of its contribution to bacterial growth  
310 capacity. If the striking impact of NADK on mortality highlights its importance in the  
311 outcome of infection, future work will be necessary to decipher the role of the enzyme at each  
312 step of the infectious process. Besides neutrophils, macrophages are crucial cells in the innate  
313 immune defense against infection. We uncovered that inhibition of *S. aureus* NADK activity  
314 has a major impact on bacteria interactions with macrophages, reducing dramatically bacterial  
315 survival after phagocytosis. An important defense mechanism of macrophages against  
316 bacterial infection being the oxidative burst (Pidwill et al., 2021), we demonstrated that the  
317 role of NADK in *S. aureus* resistance to macrophage defenses was dependent on ROS levels.  
318 Along the same lines, we showed that NADK contributed to *S. aureus* resistance to hydrogen  
319 peroxide toxicity. NADK, as the only source of NADP(H), is a key component of defense  
320 against oxidative stress (Grose et al., 2006; Mailloux et al., 2011). In bacteria, it has been  
321 shown that NADK activity is increased upon exposure to oxidative stress, acting as a  
322 metabolic switch to decrease the NAD<sup>+</sup> pool which fuels ROS formation and increase the  
323 NADPH pool which promotes ROS scavenging activities (Singh et al., 2007). However,  
324 antioxidant treatment of infected macrophages using NAC only partially mitigated growth  
325 defect of the NADK knockdown strain. NADK might thus contribute to bacterial survival  
326 within macrophages through pathways other than ROS detoxification. We showed that  
327 inhibition of *ppnK* expression led to growth defect upon envelope stress, a condition that is  
328 encountered in the host and in particular in macrophages where bacteria face antimicrobial  
329 peptides (Rosenberger et al., 2004). If toxicity mediated by triclosan could be inhibited by

330 catalase treatment of the NADK knockdown strain, osmotic stress imposed by sodium  
331 chloride could not, confirming ROS-independent roles of NADK. NADP(H) is required in  
332 two reduction steps of fatty acid synthesis and its increased availability has been shown to  
333 increase fatty acid production in *Escherichia coli* (Li et al., 2018). NADK could thus  
334 contribute to *S. aureus* fitness by promoting functional fatty acid biosynthesis and  
335 maintenance of bacterial membrane integrity. Additionally, as NADP(H) is important for  
336 central metabolism, a defect in NADK activity might impair metabolic adaptation during  
337 infection. Virulence factors synthesis has been linked with TCA cycle and amino acids  
338 biosynthesis (Zhu et al., 2009). Thus decreased NADP(H) pools might modulate virulence  
339 factor synthesis and the fate of interactions with host cells.

340         Although its activity is highly conserved in almost all living organisms, prokaryotes  
341 and human NADK are significantly different (Lerner et al., 2001). Furthermore, NADK  
342 catalytic site adopt a specific conformation in comparison to other NAD-binding enzymes  
343 (Petrelli et al., 2009). NADK, whose activity is essential for growth, is thus an interesting  
344 target for antibiotic development. Using a fragment-based drug design approach, we  
345 previously developed a family of chemical compounds targeting bacterial NADK (Gelin et  
346 al., 2012; Paoletti et al., 2016). A lead compound, NKI1, limited the growth of both  
347 methicillin sensitive and methicillin resistant *S. aureus* strains *in vitro* but also in a mouse  
348 model of infection, without any signs of toxicity (Gelin et al., 2020). The anti-infective  
349 activity of NKI1 could thus rely on its capacity to inhibit NADK-mediated bacterial stress  
350 response and virulence in addition to metabolic pathways. Interestingly, we found that  
351 inhibition of NADK could potentiate the toxicity of polymyxin B, levofloxacin, kanamycin  
352 and rifampicin in a ROS-dependent manner. Although controversial, ROS-production has  
353 been proposed as a common antibiotic-mediated killing mechanism (Baquero and Levin,  
354 2020; Van Acker and Coenye, 2017). Polymyxins have been suggested to permeabilize and/or

355 disrupt membranes of Gram-negative bacteria. They also induce ROS production through  
356 TCA cycle activation (Yin et al., 2020). ROS have been shown to contribute to bactericidal  
357 activity of quinolone antibiotics (Kottur and Nair, 2016). Both quinolones and  
358 aminoglycosides promote ROS formation mediated by TCA and NADH depletion (Belenky  
359 et al., 2015; Kohanski et al., 2007, 2010). Thus, ROS may account for antibiotic potentiation  
360 by NADK inhibitors. In addition, non-oxidative mechanisms contribute to potentiation, as  
361 NADK contributed to resistance to vancomycin in a ROS-independent manner. It would be  
362 interesting to investigate potential synergy between classical antibiotic families and NADK  
363 inhibition, especially in the context of antibiotic resistance.

364 Further investigations are now required to fully decipher the contribution of bacterial  
365 NADKs during infection processes and develop optimized NADK inhibitors that could be  
366 used in combination with current antibiotics to fight multidrug resistant bacteria.

367

## 368 **Materials and methods**

### 369 **Synteny analysis**

370 Comparative analysis of the *ppnK* genomic locus was conducted in *Bacilli* using *S. aureus*  
371 *ppnK* gene (SAOUHSC\_00943) as input on the web server SyntTax (Oberto, 2013).  
372 Generated PDF files were edited to rename genes and remove genes outside of synteny for  
373 clarity.

374

### 375 **Plasmids, bacterial strains, cell lines and culture conditions**

376 Bacterial strains and plasmids used in this study are listed in Table 1. All plasmids were  
377 maintained in *Escherichia coli* TOP10. The restriction deficient *Staphylococcus aureus* strain  
378 RN4220 was transformed with plasmids isolated from *E. coli*. The *S. aureus* Xen36 strain was  
379 transformed with plasmids isolated from the RN4220 strain as previously described (Gelin et

380 al., 2020). *E. coli* was grown in lysogeny broth (LB) medium (Difco) with shaking at 200 rpm  
 381 or on LB agar plates at 37°C. *S. aureus* was grown in brain heart infusion (BHI) broth (BD)  
 382 or in tryptic soy broth (TSB) (Difco) with shaking at 200 rpm or on BHI agar plates at 37°C.  
 383 When required, culture medium was supplemented with antibiotics (carbenicillin 100 µg/mL  
 384 for *E. coli*, chloramphenicol 15 µg/mL or anhydrotetracycline 100 ng/mL for *S. aureus*).  
 385 RAW 264.7 macrophages (TIB-71, ATCC) were cultured in DMEM (Gibco) containing 10 %  
 386 FCS (Gibco). Macrophages were seeded into 24-well plates at 10<sup>5</sup> cells per well.

387  
 388 **Table 1** Strains and plasmids used in this study.

| Strain/plasmid           | Relevant characteristics                                                                                                                                                                                                           | Reference                |
|--------------------------|------------------------------------------------------------------------------------------------------------------------------------------------------------------------------------------------------------------------------------|--------------------------|
| <b>Strains</b>           |                                                                                                                                                                                                                                    |                          |
| <i>E. coli</i> strain    |                                                                                                                                                                                                                                    |                          |
| <b>TOP10</b>             | <i>F<sup>-</sup>mcrA</i> Δ( <i>mrr-hsdRMS-mcrBC</i> ) φ80 <i>lacZ</i> Δ <i>M15</i> Δ <i>lacX74</i><br><i>recA1 araD139</i> Δ( <i>ara-leu</i> ) 7697 <i>galU galK</i> λ <i>rpsL</i> (Str <sup>R</sup> ) <i>endA1</i><br><i>nupG</i> | Invitrogen               |
| <i>S. aureus</i> strains |                                                                                                                                                                                                                                    |                          |
| <b>Xen36</b>             | Strain derived from a clinical isolate from a bacteremic patient (ATCC 49525)                                                                                                                                                      | Caliper Life Science     |
| <b>Xen36/pSD1</b>        | Xen36 strain carrying plasmid pSD1                                                                                                                                                                                                 | (Gelin et al., 2020)     |
| <b>Xen36/NADK sgRNA</b>  | Xen36 strain carrying plasmid pSD1 <i>ppnK</i>                                                                                                                                                                                     | (Gelin et al., 2020)     |
| <b>RN4220</b>            | Restriction-deficient strain derived from NCTC 8325-4                                                                                                                                                                              | (Kreiwirth et al., 1983) |
| <b>Plasmids</b>          |                                                                                                                                                                                                                                    |                          |
| <b>pSD1</b>              | dCas9 ATc-inducible expression and sgRNA constitutive expression plasmid                                                                                                                                                           | (Zhao et al., 2017)      |
| <b>pSD1 <i>ppnK</i></b>  | pSD1 plasmid carrying sgRNA targeting <i>S. aureus ppnK</i>                                                                                                                                                                        | (Gelin et al., 2020)     |

389

390 **Table 2** Primers used in this study

| Primer              | Sequence (5'-3')         |
|---------------------|--------------------------|
| <b>RT-ppnK-F</b>    | GTGACTCCAAGTCTAATGCC     |
| <b>RT-ppnK-R</b>    | ATTTTTCAACTTCATGAGGTAACC |
| <b>RT-operon-F1</b> | TGACTTGCTTAAAAAGCACACTG  |
| <b>RT-operon-R1</b> | ACGAGCATTGTGCTACTTCAGA   |
| <b>RT-operon-F2</b> | AACCGTTGAAGAAACATTTCGACA |
| <b>RT-operon-R2</b> | GACGCTTGTTCAACCAACTCA    |
| <b>RT-operon-F3</b> | CATCGTTTGAAAGAGCGGC      |
| <b>RT-operon-R3</b> | GGCATTAGACTTGGAGTCACCT   |
| <b>RT-operon-F4</b> | ACGTGTGCACGATTCTTTCAT    |
| <b>RT-operon-R4</b> | ATGGCGCTCACTGTCTTCT      |
| <b>RT-operon-F5</b> | AGTTCATTTGCATACGGGACG    |
| <b>RT-operon-R5</b> | ACGCTCTTTTTTCATCTGTGTTCA |
| <b>RT-operon-F6</b> | TAACCTGTGCGATGACGGTGG    |
| <b>RT-operon-R6</b> | TTCCAATCACAATCCCCATCAA   |
| <b>RT-operon-F7</b> | ACGTTGATGAATTGAAGCAAGAG  |
| <b>RT-operon-R7</b> | ACTTTAGCGACACCAAAAAGCA   |
| <b>RT-operon-F8</b> | TCAAGTGGCGTTACAGGTGA     |
| <b>RT-operon-R8</b> | TTCAAATACCGCCAACGCAT     |

391

## 392 **Bacterial growth measurement**

393 *S. aureus* strains were grown overnight in BHI broth at 37°C and diluted to OD<sub>600nm</sub>=0.05 into  
394 BHI broth. For NADK inhibition experiments, culture medium was supplemented with 100  
395 ng/mL anhydrotetracycline (Sigma-Aldrich) and 15 µg/mL chloramphenicol when required.  
396 For stress experiments, culture medium was supplemented at indicated concentrations with  
397 hydrogen peroxide, triton X-100, polymyxin B, kanamycin, rifampicin, vancomycin (Sigma-  
398 Aldrich), triclosan, sodium chloride (Merck) or levofloxacin (USP). Bacterial suspensions  
399 were incubated in 96-well plates with shaking at 200 rpm at 37°C. Growth was monitored  
400 with a microplate reader (Glomax Discover, Promega). Experiments were performed at least  
401 three times.

402

## 403 **RNA extraction and RT-PCR**

404 Bacteria grown for 4 h were collected by centrifugation 20 min at 15,000 x g at 4°C. Bacterial  
405 lysis was performed using Precellys lysing kit (P000914-LYSK0-A) and the Precellys  
406 program 4 (6,500 rpm for 30 sec) twice at 4°C. RNA extraction was performed in 1 mL of  
407 TRIzol (Invitrogen) according to the manufacturer's recommendations. RT-PCR was carried  
408 out with Superscript one step RT kit (Invitrogen). Primers used are indicated in Table 2. RT-  
409 PCR assays were repeated at least 3 times.

410

## 411 **Immunoblotting**

412 Bacteria grown for 4 h were collected by centrifugation 10 min at 10,000 x g at 4° C and  
413 resuspended in 500 µL of PBS. Bacteria were lysed using the Precellys lysing kit (P000914-  
414 LYSK0-A) and the Precellys program 4 (6,500 rpm for 30 sec) twice at 4°C. Lysates were  
415 centrifuged for 15 min at 10,000 x g at 4 °C and supernatants were collected for protein

416 quantification using the Quick start Bradford protein assay kit 2 (Biorad). Samples were  
417 mixed with Laemmli buffer (Biorad) and 10%  $\beta$ -mercaptoethanol and denatured for 5 min at  
418 95°C. Samples were separated onto 4–20% Miniprotean TGX stain-free precast gel (Biorad)  
419 in TGS buffer and transferred on polyvinylidene fluoride membranes. Membranes were  
420 incubated overnight at 4°C with primary antibodies diluted in 5% blotto (R114 rabbit anti-EF-  
421 Tu polyclonal antibodies, 1:5000; R250 rabbit polyclonal anti-*S. aureus* NADK antibodies,  
422 1:1000). Membranes were then incubated with 1:2500 antirabbit horseradish peroxidase-  
423 conjugated antibodies (Abcam). Blots were revealed using the ECL kit (Pierce).

424

#### 425 **Negative staining**

426 *S. aureus* were fixed with 2.5% glutaraldehyde in culture medium for 1 h at room temperature  
427 and stored overnight at 4°C before processing. Fixed bacteria were adsorbed to 300-mesh  
428 Formvar-Cu-coated grids treated with 1% alcian blue (Sigma-Aldrich) (Lang et al., 1981)  
429 (Electron Microscopy Science) for 20 min. Grids were rinsed three times with ultrapure water  
430 and stained for 1 min with 2% aqueous uranyl acetate, washed again for three times with  
431 ultrapure water and dried. Images were recorded with a TECNAI SPIRIT 120 kV  
432 transmission electron microscope equipped with a bottom-mounted EAGLE 4Kx4K camera  
433 (FEI-ThermoFisher Company).

434

#### 435 **Scanning electron microscopy**

436 Chemically fixed *S. aureus* were washed in 0.1 M HEPES buffer pH 7.2, postfixed for 1 h in  
437 1% osmium tetroxide in 0.1 M HEPES buffer pH 7.2, and rinsed with distilled water. Samples  
438 were dehydrated through a graded series of 25, 50, 75, 95 and 100% ethanol solution followed  
439 by critical point drying with CO<sub>2</sub> (CPD300 LEICA). Dried specimens were sputtered with 20  
440 nm gold palladium, with a GATAN ion beam coater, and were observed with an AURIGA

441 field emission scanning electron microscope operating at 5 kV (Carl Zeiss, Inc.). Images  
442 were acquired with the secondary electron detector.

443

#### 444 **Transmission electron microscopy**

445 Chemically fixed *S. aureus* were washed in HEPES buffer pH 7.2, postfixed with 1% osmium  
446 tetroxide in 0.1M HEPES buffer pH 7.2 for 1 h and washed three times with distilled water.  
447 Samples were resuspended in Agar-type-IX 4% solution (Sigma) and allowed to solidify on  
448 ice, dehydrated in a graded series of ethanol and embedded in epoxy resin. After  
449 polymerization, thin sections were cut with a Leica Ultramicrotome Ultracut UC7' sections  
450 (60 nm), stained with uranyl acetate and lead citrate. Images were recorded with TECNAI  
451 SPIRIT 120 kV transmission electron microscope equipped with a bottom-mounted EAGLE  
452 4Kx4K camera (FEI-Thermofisher Compagny).

453

#### 454 **RAW 264.7 macrophage infection**

455 RAW 264.7 macrophages were seeded into 24-well plates at 100,000 cells per well. *S. aureus*  
456 Xen36/pSD1 and *S. aureus* Xen36/NADK sgRNA strains were grown to an OD<sub>600nm</sub> of 0.6,  
457 washed three times and diluted in DMEM to obtain a multiplicity of infection (MOI) of 10.  
458 Infected macrophages were centrifugated at 500 x g for 5 min and incubated for 15 min at  
459 37°C and 5% CO<sub>2</sub> to synchronize phagocytosis. The medium was replaced with DMEM  
460 containing gentamicin (20 µg/mL) for 30 min to kill extracellular bacteria. Cells were washed  
461 three times in DPBS and incubated in DMEM supplemented with 100 ng/mL  
462 anhydrotetracycline and 10 mM N-acetyl cysteine (NAC, Sigma-Aldrich) when indicated.  
463 Cells were incubated for 6 h at 37°C and 5% CO<sub>2</sub>. At each time points, cells were lysed in  
464 0.2% Triton X-100 for 10 min at 37°C. The number of bacteria released from the cells was

465 determined by plating serial dilutions of the lysates on BHI agar plates that were incubated at  
466 37°C for colony-forming units (CFU) enumeration.

467

#### 468 **Immunofluorescence assay**

469 RAW 264.7 macrophages were cultured on glass coverslips in 24-well plates. At 6 h post-  
470 infection, cells were fixed in paraformaldehyde (PFA) 4% for 15 min, permeabilized for 4  
471 min with 0.1% Triton X-100 in 1% bovine serum albumin (BSA)-PBS and blocked in 1%  
472 BSA-PBS. Fixed cells were incubated for 30 min with rabbit anti-*S. aureus* (Abcam ab20920)  
473 and rat anti-LAMP1 1D4B (Abcam ab25245) primary antibodies. Cells were then incubated  
474 for 30 min with goat anti-rabbit Cy5 (Immunoresearch 111 175 144) or goat anti-rat FITC  
475 (Invitrogen A11006) secondary antibodies and DAPI (10 µg/mL). Slides were mounted with  
476 Fluoromount G (Invitrogen). Samples were observed with a Zeiss Axiovert 200M  
477 epifluorescence microscope equipped with a Plan-apochromat objective (100X/1.4 Oil Ph3;  
478 Carl Zeiss, Inc.). Images were acquired with a CCD camera Coolsnap, processed with  
479 Metamorph software v.6 (Molecular Devices) and analyzed with ImageJ software.

480

#### 481 **Ethics Statement**

482 Animal experiments were performed according to European Union guidelines for handling of  
483 laboratory animals ([http://ec.europa.eu/environment/chemicals/lab\\_animals/home\\_en.htm](http://ec.europa.eu/environment/chemicals/lab_animals/home_en.htm)).  
484 All experiments performed on larvae older than 5 days post fertilization were approved by the  
485 Institut Pasteur Animal Care and Use Committee and the French Ministry of Education,  
486 Research and Innovation, and registered under the reference APAFIS#31827.

487

#### 488 **Zebrafish care and maintenance**

489 Homozygous *Tg(mfap4::mCherryF)* (*ump6Tg*) (Phan et al., 2018) *Tg(mpx::GFP)*<sup>i114</sup>  
490 (Renshaw et al., 2006) double transgenic fishes were raised in our facility. Eggs were



491 obtained by natural spawning, bleached according to standard protocols, and then kept in Petri  
492 dishes containing Volvic spring water and, from 24 h post fertilization (hpf) onwards, 0.003%  
493 1-phenyl-2-thiourea (PTU) (Sigma-Aldrich) was added to prevent pigmentation. Embryos  
494 were reared at 28°C or 24°C according to the desired speed of development; infected larvae  
495 were always kept at 28°C. All timings in the text refer to the developmental stage at the  
496 reference temperature of 28°C. Larvae were anesthetized with 200  $\mu$ g/ml tricaine (Sigma-  
497 Aldrich) during the injection procedure as well as during *in vivo* imaging and processing for  
498 bacterial burden evaluation.

499

### 500 **Zebrafish infection**

501 The volume of injected bacterial suspension was deduced from the diameter of the drop  
502 obtained after mock microinjection, as described in (Levraud et al., 2008). Bacteria were  
503 diluted from overnight cultures and allowed to reach exponential growth. Then, they were  
504 recovered by centrifugation, washed and resuspended at the desired concentration in PBS. 55-  
505 60 hours post-fertilization, anesthetized zebrafish larvae were microinjected intravenously  
506 (IV) with 1 nL of bacterial suspension at the desired dose as described (Colucci-Guyon et al.,  
507 2011; Mostowy et al., 2013). Infected larvae were transferred into individual wells containing  
508 1 mL of Volvic water and 0.003% PTU in 24-well culture plates, incubated at 28°C and  
509 regularly observed under a stereomicroscope.

510

### 511 **Evaluation of the bacterial burden in infected zebrafish larvae**

512 Infected zebrafish larvae were collected at 0, 24, 48 and 72 hours post infection (hpi) and  
513 lysed for the evaluation of the bacterial burden as previously described (Boucontet et al.,  
514 2018; Mostowy et al., 2013). Each larva was placed in an individual 1.5 mL Eppendorf tube  
515 and anesthetized with tricaine (200  $\mu$ g/mL), washed with 1 mL of sterile water and placed in

516 150  $\mu$ L of sterile water. Larvae were then homogenized using a pestle motor mixer (Argos).  
517 Each sample was transferred to an individual well of a 96-well plate and 10 X serial dilutions  
518 were performed. For CFU enumeration and to assess plasmid stability throughout the  
519 infection kinetics, serial dilutions of lysates were plated on BHI agar plates with and without  
520 chloramphenicol (15  $\mu$ g/mL) that were incubated at 37°C.

521

### 522 **Zebrafish live imaging, image processing and analysis**

523 Quantification of total macrophages and neutrophils on living transgenic reporter larvae was  
524 performed upon infection as we previously described (Mostowy et al., 2013). Briefly, bright  
525 field, GFP and RFP images of whole living anesthetized larvae were taken using a Leica  
526 Macrofluor<sup>TM</sup> Z16 APOA (zoom 16:1) microscope equipped with a Leica PlanApo 2.0X lens,  
527 and a Photometrics<sup>®</sup> CoolSNAP<sup>TM</sup> HQ2 camera. Images were captured using the Metavue  
528 software version 7.5.6.0 (MDS Analytical Technologies). After capture of images, larvae  
529 were washed and transferred in a new 24-well plate filled with 1 mL of fresh water in each  
530 well and incubated at 28°C.

531

### 532 **Statistical analysis**

533 Results are expressed as means  $\pm$  SEM of at least 3 replicates. Statistical analysis was  
534 performed using GraphPad Prism (GraphPad Prism<sup>®</sup> 9.1.2. Software). One-way or two-ways  
535 ANOVA were used to compare data. Differences between groups were considered significant  
536 when the *p* value was lower than 0.05. Survival data were plotted using the Kaplan-Meier  
537 estimator and log-rank (Mantel-Cox) tests were performed to assess differences between  
538 groups.

539

540

541 **Aknowlegments**

542 We thank Changlong Zhao for providing pSD1. We are grateful to all members of the  
543 *Yersinia* research unit and the French national reference center for plague and other  
544 yersiniosis, the members of the NADkiller consortium as well as Frédéric Barras and Daniel  
545 Ladant for helpful discussions and insightful comments. We also wish to thank the members  
546 of the fish facility team Yohann Rolin and Noël Aimar for their excellent care of the fish.

547 This work was funded by the Agence Nationale de la Recherche (grant ANR-17-  
548 CE18-0011-02) and supported by Institut Pasteur, Université de Paris and CNRS. The  
549 *Yersinia* Research Unit and the Macrophages and Immunity Development Unit are members  
550 of the Laboratory of Excellence Integrative Biology of Emerging Infectious Diseases (ANR-  
551 10-LBX-62-IBEID). We are grateful for support for equipment from the French government  
552 Programme d'investissements d'avenir France BioImaging (ANR-10-INSB-04-01).

553

554 **Competing interests**

555 The authors declare no conflict of interest.

556

## 557 **References**

- 558
- 559 Avican K, Aldahdooh J, Togninalli M, Mahmud AKMF, Tang J, Borgwardt KM, Rhen M,  
560 Fällman M. 2021. RNA atlas of human bacterial pathogens uncovers stress dynamics  
561 linked to infection. *Nat Commun* **12**. doi:10.1038/S41467-021-23588-W
- 562 Baquero F, Levin BR. 2020. Proximate and ultimate causes of the bactericidal action of  
563 antibiotics. *Nat Rev Microbiol.* **19**:123-132. doi:10.1038/s41579-020-00443-1
- 564 Belenky P, Ye JD, Porter CBM, Cohen NR, Lobritz MA, Ferrante T, Jain S, Korry BJ,  
565 Schwarz EG, Walker GC, Collins JJ. 2015. Bactericidal antibiotics induce toxic  
566 metabolic perturbations that lead to cellular damage. *Cell Rep* **13**:968–980.  
567 doi:10.1016/j.celrep.2015.09.059
- 568 Berrin JG, Pierrugues O, Brutesco C, Alonso B, Montillet JL, Roby D, Kazmaier M. 2005.  
569 Stress induces the expression of AtNADK-1, a gene encoding a NAD(H) kinase in  
570 *Arabidopsis thaliana*. *Mol Genet Genomics* **273**:10–19. doi:10.1007/s00438-005-1113-1
- 571 Boucontet L, Passoni G, Thiry V, Maggi L, Herbomel P, Levraud J-P, Colucci-Guyon E.  
572 2018. A model of superinfection of virus-infected zebrafish larvae: increased  
573 susceptibility to bacteria associated with neutrophil death. *Front Immunol* **9**:1084.  
574 doi:10.3389/FIMMU.2018.01084
- 575 Chai M-F, Wei P-C, Chen Q-J, An R, Chen J, Yang S, Wang X-C. 2006. NADK3, a novel  
576 cytoplasmic source of NADPH, is required under conditions of oxidative stress and  
577 modulates abscisic acid responses in *Arabidopsis*. *Plant J* **47**:665–674.  
578 doi:10.1111/j.1365-313X.2006.02816.x
- 579 Chandel NS. 2021. Carbohydrate Metabolism. *Cold Spring Harb Perspect Biol* **13**:1–15.  
580 doi:10.1101/CSHPERSPECT.A040568
- 581 Chaudhuri RR, Allen AG, Owen PJ, Shalom G, Stone K, Harrison M, Burgis TA, Lockyer M,

- 582 Garcia-Lara J, Foster SJ, Pleasance SJ, Peters SE, Maskell DJ, Charles IG. 2009.  
583 Comprehensive identification of essential *Staphylococcus aureus* genes using  
584 Transposon-Mediated Differential Hybridisation (TMDH). *BMC Genomics* **10**:291.  
585 doi:10.1186/1471-2164-10-291
- 586 Chini CCS, Zeidler JD, Kashyap S, Warner G, Chini EN. 2021. Evolving concepts in NAD<sup>+</sup>  
587 metabolism. *Cell Metab.* **33**:1076-1087. doi:10.1016/j.cmet.2021.04.003
- 588 Colucci-Guyon E, Tinevez J-Y, Renshaw SA, Herbomel P. 2011. Strategies of professional  
589 phagocytes in vivo: unlike macrophages, neutrophils engulf only surface-associated  
590 microbes. *J Cell Sci* **124**:3053–3059. doi:10.1242/JCS.082792
- 591 Covarrubias AJ, Perrone R, Grozio A, Verdin E. 2021. NAD<sup>+</sup> metabolism and its roles in  
592 cellular processes during ageing. *Nat Rev Mol Cell Biol.* **22**:119–141.  
593 doi:10.1038/s41580-020-00313-x
- 594 Eisenreich W, Dandekar T, Heesemann J, Goebel W. 2010. Carbon metabolism of  
595 intracellular bacterial pathogens and possible links to virulence. *Nat Rev Microbiol*  
596 **8**:401–412. doi:10.1038/NRMICRO2351
- 597 Fang FC, Frawley ER, Tapscott T, Vázquez-Torres A. 2016. Bacterial stress responses during  
598 host infection. *Cell Host Microbe* **20**:133–143. doi:10.1016/J.CHOM.2016.07.009
- 599 Fisher DJ, Fernandez RE, Maurelli AT. 2013. *Chlamydia trachomatis* transports NAD via the  
600 Npt1 ATP/ADP translocase. *J Bacteriol* **195**:3381-3386. doi:10.1128/JB.00433-13
- 601 Galione A, Chuang K-T. 2020. Pyridine nucleotide metabolites and calcium release from  
602 intracellular stores. *Adv Exp Med Biol* **1131**:371–394. doi:10.1007/978-3-030-12457-  
603 1\_15
- 604 Gelin M, Paoletti J, Huteau V, Nahori M, Leseigneur C, Dugue L, Clement D, Pons J, Assairi  
605 L, Pochet S, Labesse G, Dussurget O. 2020. From substrate to fragments to inhibitor  
606 active in vivo against *Staphylococcus aureus*. *ACS Infect Dis* **6**:422–435.

- 607       doi:10.1021/acsinfecdis.9b00368
- 608   Gelin M, Poncet-Montange G, Assairi L, Morellato L, Huteau V, Dugué L, Dussurget O,  
609       Pochet S, Labesse G. 2012. Screening and in situ synthesis using crystals of a NAD  
610       kinase lead to a potent antistaphylococcal compound. *Structure*. **20**:1107-17.  
611       doi:10.1016/j.str.2012.03.024
- 612   Grose H., Joss L, Velick SF, Roth JR. 2006. Evidence that feedback inhibition of NAD kinase  
613       controls responses to oxidative stress. *Proc Natl Acad Sci USA* **103**:7601–7606.  
614       doi:10.1073/pnas.0602494103
- 615   Guillén J, Bernabeu A, Shapiro S, Villalaín J. 2004. Location and orientation of Triclosan in  
616       phospholipid model membranes. *Eur Biophys J* **33**:448–453. doi:10.1007/S00249-003-  
617       0378-8
- 618   Harper L, Balasubramanian D, Ohneck EA, Sause WE, Chapman J, Mejia-Sosa B, Lhakang  
619       T, Heguy A, Tsirigos A, Ueberheide B, Boyd JM, Lun DS, Torres VJ. 2018.  
620       *Staphylococcus aureus* responds to the central metabolite pyruvate to regulate virulence.  
621       *mBio* **9**:2272–2289. doi:10.1128/mBio.02272-17
- 622   Jarrett HW, Charbonneau H, Anderson JM, McCann RO, Cormier MJ. 1980. Plant  
623       calmodulin and the regulation of NAD kinase. *Ann N Y Acad Sci*. **356**: 119-29.
- 624   Kawai S, Mori S, Mukai T, Suzuki S, Yamada T, Hashimoto W, Murata K. 2000. Inorganic  
625       polyphosphate/ATP-NAD kinase of *Micrococcus flavus* and *Mycobacterium*  
626       *tuberculosis* H37Rv. *Biochem Biophys Res Commun* **276**:57–63.  
627       doi:10.1006/bbrc.2000.3433
- 628   Kobayashi K, Ehrlich SD, Albertini A, Amati G, Andersen KK, Arnaud M, Asai K, Ashikaga  
629       S, Aymerich S, Bessieres P, Boland F, Brignell SC, Bron S, Bunai K, Chapuis J,  
630       Christiansen LC, Danchin A, Débarbouillé M, Dervyn E, Deuerling E, Devine K, Devine  
631       SK, Dreesen O, Errington J, Fillinger S, Foster SJ, Fujita Y, Galizzi A, Gardan R,

- 632 Eschevins C, Fukushima T, Haga K, Harwood CR, Hecker M, Hosoya D, Hullo MF,  
633 Kakeshita H, Karamata D, Kasahara Y, Kawamura F, Koga K, Koski P, Kuwana R,  
634 Imamura D, Ishimaru M, Ishikawa S, Ishio I, le Coq D, Masson A, Mauël C, Meima R,  
635 Mellado RP, Moir A, Moriya S, Nagakawa E, Nanamiya H, Nakai S, Nygaard P, Ogura  
636 M, Ohanan T, O'Reilly M, O'Rourke M, Pragai Z, Pooley HM, Rapoport G, Rawlins JP,  
637 Rivas LA, Rivolta C, Sadaie A, Sadaie Y, Sarvas M, Sato T, Saxild HH, Scanlan E,  
638 Schumann W, Seegers JFML, Sekiguchi J, Sekowska A, Séror SJ, Simon M, Stragier P,  
639 Studer R, Takamatsu H, Tanaka T, Takeuchi M, Thomaides HB, Vagner V, van Dijl JM,  
640 Watabe K, Wipat A, Yamamoto H, Yamamoto M, Yamamoto Y, Yamane K, Yata K,  
641 Yoshida K, Yoshikawa H, Zuber U, Ogasawara N. 2003. Essential *Bacillus subtilis*  
642 genes. *Proc Natl Acad Sci USA* **100**:4678–4683. doi:10.1073/pnas.0730515100
- 643 Kohanski MA, Dwyer DJ, Collins JJ. 2010. How antibiotics kill bacteria: from targets to  
644 networks. *Nat Rev Microbiol* **8**:423–435. doi:10.1038/nrmicro2333
- 645 Kohanski MA, Dwyer DJ, Hayete B, Lawrence CA, Collins JJ. 2007. A common mechanism  
646 of cellular death induced by bactericidal antibiotics. *Cell* **130**:797–810.  
647 doi:10.1016/j.cell.2007.06.049
- 648 Kornberg A. 1950. Enzymatic synthesis of triphosphopyrinate nucleotide. *J Biol Chem*  
649 **182**:805–813.
- 650 Kottur J, Nair DT. 2016. Reactive Oxygen Species play an important role in the bactericidal  
651 activity of quinolone antibiotics. *Angew Chem Int Ed Engl* **55**:2397–2400.  
652 doi:10.1002/ANIE.201509340
- 653 Kreiswirth BN, Löfdahl S, Betley MJ, O'Reilly M, Schlievert PM, Bergdoll MS, Novick RP.  
654 1983. The toxic shock syndrome exotoxin structural gene is not detectably transmitted  
655 by a prophage. *Nature* **305**:709–712. doi:10.1038/305709a0
- 656 Lang RD, Nermut M V, Williams LD. 1981. Ultrastructure of sheep erythrocyte plasma

- 657 membranes and cytoskeletons bound to solid supports. *J Cell Sci* **49**:383–99.
- 658 Lerner F, Niere M, Ludwig A, Ziegler M. 2001. Structural and functional characterization of  
659 human NAD kinase. *Biochem Biophys Res Commun* **288**:69–74.  
660 doi:10.1006/bbrc.2001.5735
- 661 Levraud J-P, Colucci-Guyon E, Redd MJ, Lutfalla G, Herbomel P. 2008. *In vivo* analysis of  
662 zebrafish innate immunity. *Methods Mol Biol* **415**:337–363. doi:10.1007/978-1-59745-  
663 570-1\_20
- 664 Li B Bin, Wang X, Tai L, Ma TT, Shalmani A, Liu WT, Li WQ, Chen KM. 2018. NAD  
665 kinases: Metabolic targets controlling redox co-enzymes and reducing power partitioning  
666 in plant stress and development. *Front Plant Sci.* **9**:379. doi:10.3389/fpls.2018.00379
- 667 Li W, Wu H, Li M, San KY. 2018. Effect of NADPH availability on free fatty acid  
668 production in *Escherichia coli*. *Biotechnol Bioeng* **115**:444–452. doi:10.1002/bit.26464
- 669 Love NR, Pollak N, Dölle C, Niere M, Chen Y, Oliveri P, Amaya E, Patel S, Ziegler M. 2015.  
670 NAD kinase controls animal NADP biosynthesis and is modulated via evolutionarily  
671 divergent calmodulin-dependent mechanisms. *Proc Natl Acad Sci USA* **112**:1386–91.  
672 doi:10.1073/pnas.1417290112
- 673 Lu H, Tonge PJ. 2008. Inhibitors of FabI, an enzyme drug target in the bacterial fatty acid  
674 biosynthesis pathway. *Acc Chem Res* **41**:11–20. doi:10.1021/ar700156e
- 675 Mailloux RJ, Lemire J, Appanna VD. 2011. Metabolic networks to combat oxidative stress in  
676 *Pseudomonas fluorescens*. *Antonie van Leeuwenhoek* **99**:433–442. doi:10.1007/s10482-  
677 010-9538-x
- 678 McGuinness ET, Butler JR. 1985. NAD<sup>+</sup> kinase - a review. *Int J Biochem* **17**:1–11.
- 679 Mostowy S, Boucontet L, Mazon Moya MJ, Sirianni A, Boudinot P, Hollinshead M, Cossart  
680 P, Herbomel P, Levraud JP, Colucci-Guyon E. 2013. The zebrafish as a new model for  
681 the *in vivo* study of *Shigella flexneri* interaction with phagocytes and bacterial



- 682 autophagy. *PLoS Pathog* **9**:12–16. doi:10.1371/journal.ppat.1003588
- 683 Muto S, Miyachi S. 1977. Properties of a protein activator of NAD kinase from plants. *Plant*  
684 *Physiol* **59**:55–60. doi:10.1104/pp.59.1.55
- 685 Oberto J. 2013. SyntTax: A web server linking synteny to prokaryotic taxonomy. *BMC*  
686 *Bioinformatics* **14**. doi:10.1186/1471-2105-14-4
- 687 Paoletti J, Assairi L, Gelin M, Huteau V, Nahori MA, Dussurget O, Labesse G, Pochet S.  
688 2016. 8-Thioalkyl-adenosine derivatives inhibit *Listeria monocytogenes* NAD kinase  
689 through a novel binding mode. *Eur J Med Chem* **124**:1041–1056.  
690 doi:10.1016/j.ejmech.2016.10.033
- 691 Petrelli R, Sham YY, Chen L, Felczak K, Bennett E, Wilson D, Aldrich C, Yu JS, Cappellacci  
692 L, Franchetti P, Grifantini M, Mazzola F, Di Stefano M, Magni G, Pankiewicz KW.  
693 2009. Selective inhibition of nicotinamide adenine dinucleotide kinases by dinucleoside  
694 disulfide mimics of nicotinamide adenine dinucleotide analogues. *Bioorganic Med Chem*  
695 **17**:5656–5664. doi:10.1016/j.bmc.2009.06.013
- 696 Phan QT, Sipka T, Gonzalez C, Levraud J-P, Lutfalla G, Nguyen-Chi M. 2018. Neutrophils  
697 use superoxide to control bacterial infection at a distance. *PLoS Pathog* **14**:e1007157.  
698 doi:10.1371/JOURNAL.PPAT.1007157
- 699 Pidwill GR, Gibson JF, Cole J, Renshaw SA, Foster SJ. 2021. The role of macrophages in  
700 *Staphylococcus aureus* infection. *Front Immunol* **11**:3506.  
701 doi:10.3389/fimmu.2020.620339
- 702 Pollitt EJJ, Szkuta PT, Burns N, Foster SJ. 2018. *Staphylococcus aureus* infection dynamics.  
703 *PLoS Pathog* **14**:e1007112. doi:10.1371/journal.ppat.1007112
- 704 Potter AD, Butrico CE, Ford CA, Curry JM, Trenary IA, Tummarakota SS, Hendrix AS,  
705 Young JD, Cassat JE. 2020. Host nutrient milieu drives an essential role for aspartate  
706 biosynthesis during invasive *Staphylococcus aureus* infection. *Proc Natl Acad Sci USA*

- 707           **117**:12394–12401. doi:10.1073/pnas.1922211117
- 708   Prajsnar TK, Cunliffe VT, Foster SJ, Renshaw SA. 2008. A novel vertebrate model of  
709           *Staphylococcus aureus* infection reveals phagocyte-dependent resistance of zebrafish to  
710           non-host specialized pathogens. *Cell Microbiol* **10**:2312–2325. doi:10.1111/j.1462-  
711           5822.2008.01213.x
- 712   Prajsnar TK, Hamilton R, Garcia - Lara J, McVicker G, Williams A, Boots M, Foster SJ,  
713           Renshaw SA. 2012. A privileged intraphagocyte niche is responsible for disseminated  
714           infection of *Staphylococcus aureus* in a zebrafish model. *Cell Microbiol* **14**:1600–1619.  
715           doi:10.1111/j.1462-5822.2012.01826.x
- 716   Renshaw SA, Loynes CA, Trushell DMI, Elworthy S, Ingham PW, Whyte MKB. 2006. A  
717           transgenic zebrafish model of neutrophilic inflammation. *Blood* **108**:3976–3978.  
718           doi:10.1182/BLOOD-2006-05-024075
- 719   Richardson AR. 2019. Virulence and metabolism. *Microbiol Spectr* **7**.  
720           doi:10.1128/microbiolspec.gpp3-0011-2018
- 721   Rosenberger CM, Gallo RL, Finlay BB. 2004. Interplay between antibacterial effectors: a  
722           macrophage antimicrobial peptide impairs intracellular *Salmonella* replication. *Proc*  
723           *Natl Acad Sci USA* **101**:2422-7. doi:10.1073/pnas.0304455101
- 724   Ruiz JM, Sánchez E, García PC, López-Lefebvre LR, Rivero RM, Romero L. 2002. Proline  
725           metabolism and NAD kinase activity in greenbean plants subjected to cold-shock.  
726           *Phytochemistry* **59**:473–478. doi:10.1016/S0031-9422(01)00481-2
- 727   Sasseti CM, Boyd DH, Rubin EJ. 2003. Genes required for mycobacterial growth defined by  
728           high density mutagenesis. *Mol Microbiol* **48**:77–84. doi:10.1046/j.1365-  
729           2958.2003.03425.x
- 730   Simon P, Dieter P, Bonzon M, Greppin H, Marmé D. 1982. Calmodulin-dependent and  
731           independent NAD kinase activities from cytoplasmic and chloroplastic fractions of

- 732 spinach (*Spinacia oleracea* L.). *Plant Cell Rep* **1**:119-122. doi:10.1007/BF00272368
- 733 Singh R, Mailloux RJ, Puiseux-Dao S, Appanna VD. 2007. Oxidative stress evokes a  
734 metabolic adaptation that favors increased NADPH synthesis and decreased NADH  
735 production in *Pseudomonas fluorescens*. *J Bacteriol* **189**:6665–6675.  
736 doi:10.1128/JB.00555-07
- 737 Ślaski JJ. 1995. NAD<sup>+</sup> kinase activity in root tips of nearly isogenic lines of wheat (*Triticum*  
738 *aestivum* L.) that differ in their tolerance to aluminium. *J Plant Physiol* **145**:143–147.  
739 doi:10.1016/S0176-1617(11)81861-4
- 740 Tai L, Li B-B, Nie X-M, Zhang P-P, Hu C-H, Zhang L, Liu W-T, Li W-Q, Chen K-M. 2019.  
741 Calmodulin is the fundamental regulator of NADK-mediated NAD signaling in plants.  
742 *Front Plant Sci* **10**:681. doi:10.3389/fpls.2019.00681
- 743 Teoh WP, Chen X, Laczkovich I, Alonzo F 3rd. 2021. *Staphylococcus aureus* adapts to the  
744 host nutritional landscape to overcome tissue-specific branched-chain fatty acid  
745 requirement. *Proc Natl Acad Sci USA* **118**. doi:10.1073/PNAS.2022720118
- 746 Tomlinson KL, Lung TWF, Dach F, Annavajhala MK, Gabryszewski SJ, Groves RA, Drikkic  
747 M, Francoeur NJ, Sridhar SH, Smith ML, Khanal S, Britto CJ, Sebra R, Lewis I,  
748 Uhlemann AC, Kahl BC, Prince AS, Riquelme SA. 2021. *Staphylococcus aureus*  
749 induces an itaconate-dominated immunometabolic response that drives biofilm  
750 formation. *Nat Commun* **12**. doi:10.1038/s41467-021-21718-y
- 751 Turner NA, Sharma-Kuinkel BK, Maskarinec SA, Eichenberger EM, Shah PP, Carugati M,  
752 Holland TL, Fowler VG. 2019. Methicillin-resistant *Staphylococcus aureus*: an overview  
753 of basic and clinical research. *Nat Rev Microbiol*. **17**:203-218. doi:10.1038/s41579-018-  
754 0147-4
- 755 Turner WL, Waller JC, Vanderbeld B, Snedden WA. 2004. Cloning and characterization of  
756 two NAD kinases from *Arabidopsis*. Identification of a calmodulin binding isoform.

- 757 *Plant Physiol* **135**:1243–1255. doi:10.1104/pp.104.040428
- 758 Van Acker H, Coenye T. 2017. The role of reactive oxygen species in antibiotic-mediated  
759 killing of bacteria. *Trends Microbiol.* **25**:456-466. doi:10.1016/j.tim.2016.12.008
- 760 Vestergaard M, Frees D, Ingmer H. 2019. Antibiotic resistance and the MRSA problem.  
761 *Microbiol Spectr* **7**. doi:10.1128/microbiolspec.GPP3-0057-2018
- 762 Vestergaard M, Nøhr-Meldgaard K, Bojer MS, Krogsgård Nielsen C, Meyer RL, Slavetinsky  
763 C, Peschel A, Ingmer H. 2017. Inhibition of the ATP synthase eliminates the intrinsic  
764 resistance of *Staphylococcus aureus* towards polymyxins. *mBio* **8**.  
765 doi:10.1128/MBIO.01114-17
- 766 Vestin R. 1937. Enzymic change from codehydrogenase I to codehydrogenase II.  
767 *Naturwissenschaften* **25**:667–8.
- 768 Von Euler H, Adler E. 1938. Enzymic intertransformation of codehydrogenase I and  
769 codehydrogenase II. *Z Physiol Chem* **252**:41–8.
- 770 Yin J, Meng Q, Cheng D, Fu J, Luo Q, Liu Y, Yu Z. 2020. Mechanisms of bactericidal action  
771 and resistance of polymyxins for Gram-positive bacteria. *Appl Microbiol Biotechnol*  
772 **104**:3771–3780. doi:10.1007/s00253-020-10525-y
- 773 Zhao C, Shu X, Sun B. 2017. Construction of a gene knockdown system based on  
774 catalytically inactive (“dead”) Cas9 (dCas9) in *Staphylococcus aureus*. *Appl Environ*  
775 *Microbiol* **83**. doi:10.1128/AEM.00291-17
- 776 Zhu Y, Xiong YQ, Sadykov MR, Fey PD, Lei MG, Lee CY, Bayer AS, Somerville GA. 2009.  
777 Tricarboxylic acid cycle-dependent attenuation of *Staphylococcus aureus in vivo*  
778 virulence by selective inhibition of amino acid transport. *Infect Immun* **77**:4256–4264.  
779 doi:10.1128/IAI.00195-09
- 780

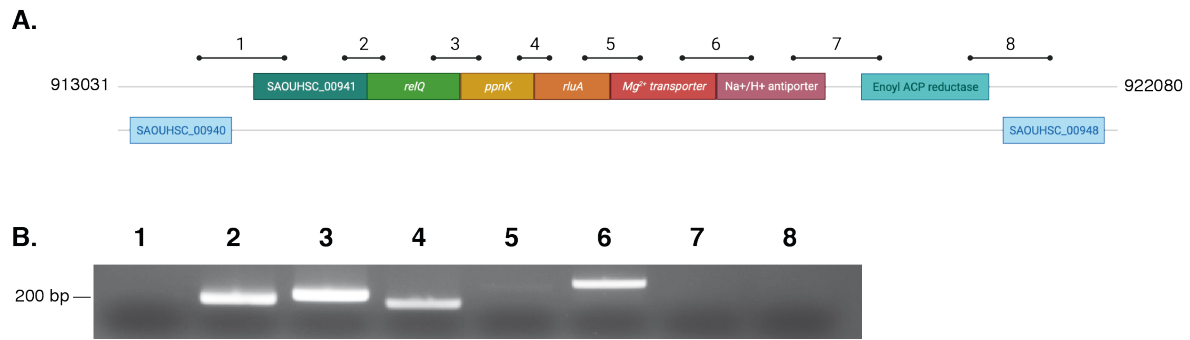

781

782 **Figure supplement 1** *S. aureus ppnK* gene is part of the *relQ* operon. (A) Genomic region surrounding the *ppnK* gene of *S.*

783 *aureus* NCTC8325 (sequence NC\_007795.1) between nucleotides 913031 and 922080. Bars and numbers represent the

784 regions amplified by RT-PCR. (B) Ethidium bromide staining of DNA in an agarose gel following RT-PCR amplification

785 using total RNA from *S. aureus* NCTC8325 and primers located in regions indicated in (A).

786

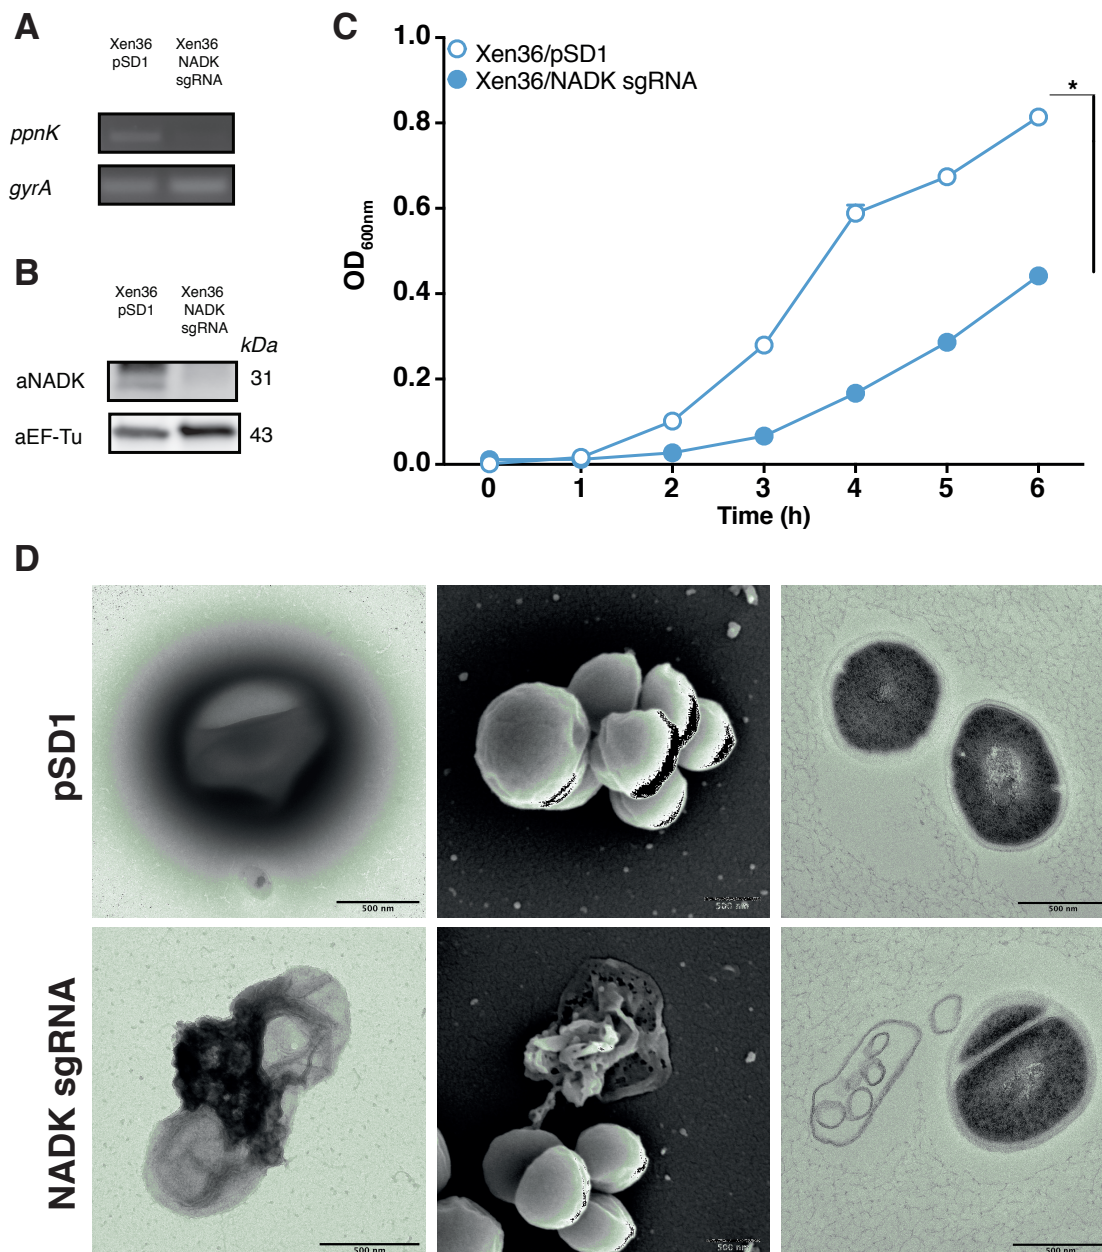

787

788

789 **Figure supplement 2** NADK is important for *S. aureus* growth. (A) Total RNA of Xen36/pSD1 and Xen36/NADK sgRNA

790 strains were analyzed by RT-PCR using oligonucleotides in *ppnK* and *gyrA* (control). (B) Bacterial protein extracts of

791 Xen36/pSD1 and Xen36/NADK sgRNA strains were analyzed by immunoblotting using anti-NADK and anti-EF-Tu

792 (control) antibodies. (C) Bacterial growths of Xen36/pSD1 and Xen36/NADK sgRNA strains were monitored for 6 hours at

793 OD<sub>600nm</sub> in BHI broth at 37°C with ATc induction for *ppnK* knock-down. Data shown are representative of three independent

794 experiments (n=3). Bars indicate the standard error of the means of biological replicates. Comparison of data was performed

795 using a t test (\*p<0.05). (D) Negative contrast (left), SEM (central) and TEM (right) images of Xen36/pSD1 (top) and

796 Xen36/NADK sgRNA (bottom) strains after 6 hours of growth. Scale bar: 500 nm.

797

798

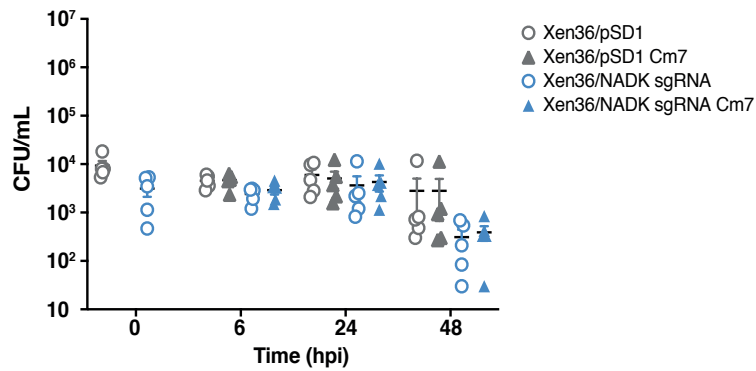

799

800 **Figure supplement 3** Plasmids are conserved during *S. aureus* infection of zebrafish. The number of Xen36/pSD1 (grey) or  
801 Xen36/NADK sgRNA (blue) *S. aureus* was monitored in zebrafish larvae after intravenous injection with  $5 \cdot 10^3$  bacteria. For  
802 each strain, CFU were determined 6, 24 and 48 hours post-infection by plating fish lysates on BHI (circles) and BHI  
803 supplemented with chloramphenicol (triangles) (n=5).

804
