# Supplementary material for: NAD kinase promotes Staphylococcus aureus pathogenesis by supporting production of virulence factors and protective enzymes
Source: bioRxiv preprint, doi:10.1101/2021.08.09.455706, version 2 (2022-05-05)
Supplement: Table supplement 1 [file 455706_file02.xlsx]

## Sheet: Present-NTWT_Absent-NTCRIS
General information											pSD1					sgRNA NADK
Uniprot	Average iBAQ Control	Protein Name	Gene Name	Protein IDs	Majority protein IDs	Fasta headers	Number of proteins	Number of peptide identified	Mol. weight [kDa]	Q-value	WT_NT_1	WT_NT_2	WT_NT_3	WT_NT_4	WT_NT_5	CRIS_NT_1	CRIS_NT_2	CRIS_NT_3	CRIS_NT_4	CRIS_NT_5
							If more than 1 : peptides are shared	all sample combined	Theoretical	Statistical Score	Intensity	Intensity	Intensity	Intensity	Intensity	Intensity	Intensity	Intensity	Intensity	Intensity
P0A0K3	27.9897	Y2013_STAA8	SAOUHSC_02013	sp|P0A0K3|Y2013_STAA8	sp|P0A0K3|Y2013_STAA8	sp|P0A0K3|Y2013_STAA8 Uncharacterized protein SAOUHSC_02013 OS=Staphylococcus aureus (strain NCTC 8325 / PS 47) OX=93061 GN=SAOUHSC_02013 PE=3 SV=1	1	9	18.632	0	2346000000	3306600000	2250400000	2580800000	2985100000	0	0	0	0	0
Q2FWM4	26.9626	Q2FWM4_STAA8	SAOUHSC_02265	tr|Q2FWM4|Q2FWM4_STAA8	tr|Q2FWM4|Q2FWM4_STAA8	tr|Q2FWM4|Q2FWM4_STAA8 Accessory gene regulator protein A OS=Staphylococcus aureus (strain NCTC 8325 / PS 47) OX=93061 GN=SAOUHSC_02265 PE=4 SV=1	1	17	24.253	0	1557200000	3163600000	1604300000	2624800000	2618600000	0	0	0	0	0
Q2FXN8	26.7241	Q2FXN8_STAA8	SAOUHSC_01798	tr|Q2FXN8|Q2FXN8_STAA8	tr|Q2FXN8|Q2FXN8_STAA8	tr|Q2FXN8|Q2FXN8_STAA8 Uncharacterized protein OS=Staphylococcus aureus (strain NCTC 8325 / PS 47) OX=93061 GN=SAOUHSC_01798 PE=4 SV=1	1	2	57.696	0.0050125	1158600000	1565100000	0	2177900000	1935700000	0	0	0	0	0
P0C818	25.4831	PSMA4_STAA8	psmA4	sp|P0C818|PSMA4_STAA8	sp|P0C818|PSMA4_STAA8	sp|P0C818|PSMA4_STAA8 Phenol-soluble modulin alpha 4 peptide OS=Staphylococcus aureus (strain NCTC 8325 / PS 47) OX=93061 GN=psmA4 PE=3 SV=1	1	2	2.1718	0.0086903	80022000	105340000	71571000	105480000	114130000	0	0	0	0	0
Q2FVK2	25.4022	HLGC_STAA8	hlgC	sp|Q2FVK2|HLGC_STAA8	sp|Q2FVK2|HLGC_STAA8	sp|Q2FVK2|HLGC_STAA8 Gamma-hemolysin component C OS=Staphylococcus aureus (strain NCTC 8325 / PS 47) OX=93061 GN=hlgC PE=1 SV=1	1	10	35.613	0	544370000	1438200000	1031200000	1252600000	873730000	0	0	0	0	0
Q2FWP6	25.3861	Q2FWP6_STAA8	SAOUHSC_02235	tr|Q2FWP6|Q2FWP6_STAA8	tr|Q2FWP6|Q2FWP6_STAA8	tr|Q2FWP6|Q2FWP6_STAA8 Repressor OS=Staphylococcus aureus (strain NCTC 8325 / PS 47) OX=93061 GN=SAOUHSC_02235 PE=4 SV=1	1	2	29.064	0.0050031	651400000	749740000	1072100000	830490000	704660000	0	0	0	0	0
Q2FZS2	24.5726	Q2FZS2_STAA8	SAOUHSC_00918	tr|Q2FZS2|Q2FZS2_STAA8	tr|Q2FZS2|Q2FZS2_STAA8	tr|Q2FZS2|Q2FZS2_STAA8 Truncated MHC class II analog protein OS=Staphylococcus aureus (strain NCTC 8325 / PS 47) OX=93061 GN=SAOUHSC_00918 PE=4 SV=1	1	5	15.838	0	204230000	252980000	196540000	365390000	260630000	0	0	0	0	0
P0C7Y1	24.5465	PSMA1_STAA8	psmA1	sp|P0C7Y1|PSMA1_STAA8;sp|P0C7Z3|PSMA2_STAA8	sp|P0C7Y1|PSMA1_STAA8;sp|P0C7Z3|PSMA2_STAA8	sp|P0C7Y1|PSMA1_STAA8 Phenol-soluble modulin alpha 1 peptide OS=Staphylococcus aureus (strain NCTC 8325 / PS 47) OX=93061 GN=psmA1 PE=1 SV=1;sp|P0C7Z3|PSMA2_STAA8 Phenol-soluble modulin alpha 2 peptide OS=Staphylococcus aureus (strain NCTC 8325 / PS 47) OX	2	2	2.2598	0.0044671	0	83026000	43686000	20030000	79390000	0	0	0	0	0
Q2G2Q7	24.4694	Q2G2Q7_STAA8	SAOUHSC_00276	tr|Q2G2Q7|Q2G2Q7_STAA8	tr|Q2G2Q7|Q2G2Q7_STAA8	tr|Q2G2Q7|Q2G2Q7_STAA8 Uncharacterized protein OS=Staphylococcus aureus (strain NCTC 8325 / PS 47) OX=93061 GN=SAOUHSC_00276 PE=4 SV=1	1	5	19.989	0	255900000	232150000	237890000	206620000	372950000	0	0	26543000	0	52080000
Q2G2P5	23.4661	NIKA_STAA8	nikA	sp|Q2G2P5|NIKA_STAA8	sp|Q2G2P5|NIKA_STAA8	sp|Q2G2P5|NIKA_STAA8 Nickel-binding protein NikA OS=Staphylococcus aureus (strain NCTC 8325 / PS 47) OX=93061 GN=nikA PE=1 SV=2	1	18	55.43	0	367390000	771040000	397450000	480770000	504550000	0	0	0	0	0
Q2G2Q5	23.1637	Q2G2Q5_STAA8	SAOUHSC_00278	tr|Q2G2Q5|Q2G2Q5_STAA8	tr|Q2G2Q5|Q2G2Q5_STAA8	tr|Q2G2Q5|Q2G2Q5_STAA8 Uncharacterized protein OS=Staphylococcus aureus (strain NCTC 8325 / PS 47) OX=93061 GN=SAOUHSC_00278 PE=4 SV=1	1	5	19.437	0	89539000	151280000	125580000	153460000	69845000	0	0	56958000	0	0
Q2FZA3	23.1582	Q2FZA3_STAA8	SAOUHSC_01136	tr|Q2FZA3|Q2FZA3_STAA8	tr|Q2FZA3|Q2FZA3_STAA8	tr|Q2FZA3|Q2FZA3_STAA8 Uncharacterized protein OS=Staphylococcus aureus (strain NCTC 8325 / PS 47) OX=93061 GN=SAOUHSC_01136 PE=3 SV=1	1	1	4.4561	0	13678000	19490000	0	0	24611000	0	0	0	0	0
Q2G260	23.1367	Y094_STAA8	SAOUHSC_00094	sp|Q2G260|Y094_STAA8	sp|Q2G260|Y094_STAA8	sp|Q2G260|Y094_STAA8 Uncharacterized protein SAOUHSC_00094 OS=Staphylococcus aureus (strain NCTC 8325 / PS 47) OX=93061 GN=SAOUHSC_00094 PE=1 SV=1	1	5	21.847	0	80344000	234990000	0	90037000	121550000	0	0	0	0	0
P60611	23.1112	LYTR_STAA8	lytR	sp|P60611|LYTR_STAA8	sp|P60611|LYTR_STAA8	sp|P60611|LYTR_STAA8 Transcriptional regulatory protein LytR OS=Staphylococcus aureus (strain NCTC 8325 / PS 47) OX=93061 GN=lytR PE=1 SV=1	1	4	28.221	0	96541000	145580000	125420000	110440000	168690000	0	0	0	0	0
Q2FWM9	23.1026	Q2FWM9_STAA8	SAOUHSC_02259	tr|Q2FWM9|Q2FWM9_STAA8	tr|Q2FWM9|Q2FWM9_STAA8	tr|Q2FWM9|Q2FWM9_STAA8 CN hydrolase domain-containing protein OS=Staphylococcus aureus (strain NCTC 8325 / PS 47) OX=93061 GN=SAOUHSC_02259 PE=3 SV=1	1	5	29.825	0	121270000	81857000	158890000	134870000	149880000	0	0	0	0	0
Q2G0D4	22.8669	SSAAL_STAA8	SAOUHSC_00671	sp|Q2G0D4|SSAAL_STAA8	sp|Q2G0D4|SSAAL_STAA8	sp|Q2G0D4|SSAAL_STAA8 Probable autolysin SsaALP OS=Staphylococcus aureus (strain NCTC 8325 / PS 47) OX=93061 GN=SAOUHSC_00671 PE=1 SV=1	1	4	28.186	0	38956000	27631000	66400000	29940000	0	0	0	0	0	0
Q2G114	22.8615	Q2G114_STAA8	SAOUHSC_00347	tr|Q2G114|Q2G114_STAA8	tr|Q2G114|Q2G114_STAA8	tr|Q2G114|Q2G114_STAA8 Uncharacterized protein OS=Staphylococcus aureus (strain NCTC 8325 / PS 47) OX=93061 GN=SAOUHSC_00347 PE=4 SV=1	1	2	7.3122	0.0025823	32940000	40761000	23791000	63218000	39781000	0	0	0	0	0
Q2FV23	22.8335	PAND_STAA8	panD	sp|Q2FV23|PAND_STAA8	sp|Q2FV23|PAND_STAA8	sp|Q2FV23|PAND_STAA8 Aspartate 1-decarboxylase OS=Staphylococcus aureus (strain NCTC 8325 / PS 47) OX=93061 GN=panD PE=3 SV=2	1	2	14.05	0.0025873	78181000	75784000	0	64236000	53799000	0	0	0	0	0
Q2FYE2	22.7949	Q2FYE2_STAA8	SAOUHSC_01512	tr|Q2FYE2|Q2FYE2_STAA8;tr|Q2FY81|Q2FY81_STAA8	tr|Q2FYE2|Q2FYE2_STAA8;tr|Q2FY81|Q2FY81_STAA8	tr|Q2FYE2|Q2FYE2_STAA8 Uncharacterized protein OS=Staphylococcus aureus (strain NCTC 8325 / PS 47) OX=93061 GN=SAOUHSC_01512 PE=4 SV=1;tr|Q2FY81|Q2FY81_STAA8 Uncharacterized protein OS=Staphylococcus aureus (strain NCTC 8325 / PS 47) OX=93061 GN=SAOUHSC_01	2	6	35.21	0	99393000	341150000	65963000	353910000	205280000	0	0	0	0	0
Q2FWC2	22.5232	Q2FWC2_STAA8	SAOUHSC_02376	tr|Q2FWC2|Q2FWC2_STAA8	tr|Q2FWC2|Q2FWC2_STAA8	tr|Q2FWC2|Q2FWC2_STAA8 Uncharacterized protein OS=Staphylococcus aureus (strain NCTC 8325 / PS 47) OX=93061 GN=SAOUHSC_02376 PE=4 SV=1	1	3	13.339	0	10116000	53931000	97948000	0	247030000	0	0	0	0	0
Q2FVG3	22.5228	Q2FVG3_STAA8	SAOUHSC_02751	tr|Q2FVG3|Q2FVG3_STAA8	tr|Q2FVG3|Q2FVG3_STAA8	tr|Q2FVG3|Q2FVG3_STAA8 Carboxylic ester hydrolase OS=Staphylococcus aureus (strain NCTC 8325 / PS 47) OX=93061 GN=SAOUHSC_02751 PE=3 SV=1	1	6	51.968	0	105500000	142370000	91848000	122100000	243140000	0	0	0	0	0
Q2FVC5	22.5089	Y2788_STAA8	SAOUHSC_02788	sp|Q2FVC5|Y2788_STAA8;sp|Q2G1Q1|Y052_STAA8;sp|Q2G1P8|Y055_STAA8;sp|Q2G1Q0|Y053_STAA8	sp|Q2FVC5|Y2788_STAA8	sp|Q2FVC5|Y2788_STAA8 Uncharacterized lipoprotein SAOUHSC_02788 OS=Staphylococcus aureus (strain NCTC 8325 / PS 47) OX=93061 GN=SAOUHSC_02788 PE=3 SV=1	4	10	30.325	0	91494000	231540000	41294000	232180000	240000000	49832000	48084000	120980000	61060000	115800000
Q2G1G4	22.4208	Q2G1G4_STAA8	SAOUHSC_00160	tr|Q2G1G4|Q2G1G4_STAA8	tr|Q2G1G4|Q2G1G4_STAA8	tr|Q2G1G4|Q2G1G4_STAA8 Uncharacterized protein OS=Staphylococcus aureus (strain NCTC 8325 / PS 47) OX=93061 GN=SAOUHSC_00160 PE=4 SV=1	1	6	32.987	0	42625000	92250000	178730000	44170000	255230000	0	0	0	0	0
Q2G2W4	22.3924	Q2G2W4_STAA8	SAOUHSC_02631	tr|Q2G2W4|Q2G2W4_STAA8	tr|Q2G2W4|Q2G2W4_STAA8	tr|Q2G2W4|Q2G2W4_STAA8 HTH tetR-type domain-containing protein OS=Staphylococcus aureus (strain NCTC 8325 / PS 47) OX=93061 GN=SAOUHSC_02631 PE=4 SV=1	1	2	21.726	0	54165000	55214000	46661000	49030000	73909000	0	0	0	0	0
Q2FVP8	22.3777	FENR_STAA8	SAOUHSC_02654	sp|Q2FVP8|FENR_STAA8	sp|Q2FVP8|FENR_STAA8	sp|Q2FVP8|FENR_STAA8 Ferredoxin--NADP reductase OS=Staphylococcus aureus (strain NCTC 8325 / PS 47) OX=93061 GN=SAOUHSC_02654 PE=1 SV=1	1	5	38.229	0	104740000	110920000	135500000	269620000	110590000	0	0	0	0	0
Q2FXU3	22.3525	LYTH_STAA8	lytH	sp|Q2FXU3|LYTH_STAA8	sp|Q2FXU3|LYTH_STAA8	sp|Q2FXU3|LYTH_STAA8 Probable cell wall amidase LytH OS=Staphylococcus aureus (strain NCTC 8325 / PS 47) OX=93061 GN=lytH PE=3 SV=1	1	5	32.694	0	62323000	124740000	52391000	170330000	119940000	0	0	0	0	0
Q2G117	22.0672	Q2G117_STAA8	SAOUHSC_00344	tr|Q2G117|Q2G117_STAA8	tr|Q2G117|Q2G117_STAA8	tr|Q2G117|Q2G117_STAA8 Uncharacterized protein OS=Staphylococcus aureus (strain NCTC 8325 / PS 47) OX=93061 GN=SAOUHSC_00344 PE=3 SV=1	1	4	32.186	0	0	32778000	64913000	79924000	143680000	0	0	0	0	0
Q2G1K7	21.9709	Q2G1K7_STAA8	SAOUHSC_00115	tr|Q2G1K7|Q2G1K7_STAA8	tr|Q2G1K7|Q2G1K7_STAA8	tr|Q2G1K7|Q2G1K7_STAA8 Non-specific protein-tyrosine kinase OS=Staphylococcus aureus (strain NCTC 8325 / PS 47) OX=93061 GN=SAOUHSC_00115 PE=3 SV=1	1	5	25.285	0	60853000	78234000	39459000	52526000	90330000	0	0	0	0	0
Q2FXF9	21.9679	Q2FXF9_STAA8	SAOUHSC_01889	tr|Q2FXF9|Q2FXF9_STAA8	tr|Q2FXF9|Q2FXF9_STAA8	tr|Q2FXF9|Q2FXF9_STAA8 Riboflavin biosynthesis protein RibD OS=Staphylococcus aureus (strain NCTC 8325 / PS 47) OX=93061 GN=SAOUHSC_01889 PE=3 SV=1	1	3	37.439	0	46581000	74164000	0	100100000	53666000	0	0	0	0	0
Q2G2A0	21.9251	Q2G2A0_STAA8	SAOUHSC_01694	tr|Q2G2A0|Q2G2A0_STAA8	tr|Q2G2A0|Q2G2A0_STAA8	tr|Q2G2A0|Q2G2A0_STAA8 Methyltransf_25 domain-containing protein OS=Staphylococcus aureus (strain NCTC 8325 / PS 47) OX=93061 GN=SAOUHSC_01694 PE=4 SV=1	1	4	27.702	0.001336	39868000	62636000	41840000	17603000	54444000	0	0	0	0	0
Q2FWA8	21.8415	Q2FWA8_STAA8	SAOUHSC_02390	tr|Q2FWA8|Q2FWA8_STAA8	tr|Q2FWA8|Q2FWA8_STAA8	tr|Q2FWA8|Q2FWA8_STAA8 Lytic regulatory protein, putative OS=Staphylococcus aureus (strain NCTC 8325 / PS 47) OX=93061 GN=SAOUHSC_02390 PE=4 SV=1	1	4	40.665	0	0	24642000	97421000	36176000	367380000	0	0	0	0	0
Q2G1T1	21.8298	Q2G1T1_STAA8	SAOUHSC_00827	tr|Q2G1T1|Q2G1T1_STAA8	tr|Q2G1T1|Q2G1T1_STAA8	tr|Q2G1T1|Q2G1T1_STAA8 Uncharacterized protein OS=Staphylococcus aureus (strain NCTC 8325 / PS 47) OX=93061 GN=SAOUHSC_00827 PE=4 SV=1	1	8	21.342	0	18406000	170510000	13597000	112810000	113510000	0	0	0	0	0
Q2G2B6	21.7857	Q2G2B6_STAA8	SAOUHSC_00215	tr|Q2G2B6|Q2G2B6_STAA8	tr|Q2G2B6|Q2G2B6_STAA8	tr|Q2G2B6|Q2G2B6_STAA8 PTS system component, putative OS=Staphylococcus aureus (strain NCTC 8325 / PS 47) OX=93061 GN=SAOUHSC_00215 PE=1 SV=1	1	1	10.179	0.0098949	29043000	0	17851000	19689000	0	0	0	0	0	0
Q2FVC3	21.6927	Q2FVC3_STAA8	SAOUHSC_02790	tr|Q2FVC3|Q2FVC3_STAA8	tr|Q2FVC3|Q2FVC3_STAA8	tr|Q2FVC3|Q2FVC3_STAA8 Uncharacterized protein OS=Staphylococcus aureus (strain NCTC 8325 / PS 47) OX=93061 GN=SAOUHSC_02790 PE=4 SV=1	1	23	109.9	0	218440000	340330000	209850000	195190000	372620000	0	0	0	0	0
Q2FUU5	21.6168	LIP1_STAA8	lipA	sp|Q2FUU5|LIP1_STAA8	sp|Q2FUU5|LIP1_STAA8	sp|Q2FUU5|LIP1_STAA8 Lipase 1 OS=Staphylococcus aureus (strain NCTC 8325 / PS 47) OX=93061 GN=lipA PE=1 SV=1	1	10	76.675	0	92968000	278520000	80017000	246150000	190500000	0	0	0	0	0
Q2G137	21.4636	Q2G137_STAA8	SAOUHSC_00318	tr|Q2G137|Q2G137_STAA8	tr|Q2G137|Q2G137_STAA8	tr|Q2G137|Q2G137_STAA8 Uncharacterized protein OS=Staphylococcus aureus (strain NCTC 8325 / PS 47) OX=93061 GN=SAOUHSC_00318 PE=4 SV=1	1	3	35.579	0	0	52352000	49344000	48440000	11591000	0	0	0	0	0
Q2FVS2	21.4451	Q2FVS2_STAA8	SAOUHSC_02620	tr|Q2FVS2|Q2FVS2_STAA8	tr|Q2FVS2|Q2FVS2_STAA8	tr|Q2FVS2|Q2FVS2_STAA8 Uncharacterized protein OS=Staphylococcus aureus (strain NCTC 8325 / PS 47) OX=93061 GN=SAOUHSC_02620 PE=4 SV=1	1	2	24.956	0.003866	21502000	23007000	20729000	23375000	46732000	0	0	0	0	0
P0A0Q0	21.3068	LACR_STAA8	lacR	sp|P0A0Q0|LACR_STAA8	sp|P0A0Q0|LACR_STAA8	sp|P0A0Q0|LACR_STAA8 Lactose phosphotransferase system repressor OS=Staphylococcus aureus (strain NCTC 8325 / PS 47) OX=93061 GN=lacR PE=4 SV=1	1	3	28.548	0.0013387	0	53506000	29001000	65603000	0	0	0	0	0	0
Q2FVI4	21.2576	Q2FVI4_STAA8	SAOUHSC_02726	tr|Q2FVI4|Q2FVI4_STAA8	tr|Q2FVI4|Q2FVI4_STAA8	tr|Q2FVI4|Q2FVI4_STAA8 Positive transcriptional activator, putative OS=Staphylococcus aureus (strain NCTC 8325 / PS 47) OX=93061 GN=SAOUHSC_02726 PE=4 SV=1	1	2	17.72	0	24672000	0	17278000	63882000	0	0	0	0	0	0
Q2FY63	21.1566	Q2FY63_STAA8	SAOUHSC_01602	tr|Q2FY63|Q2FY63_STAA8	tr|Q2FY63|Q2FY63_STAA8	tr|Q2FY63|Q2FY63_STAA8 Transcriptional regulator, putative OS=Staphylococcus aureus (strain NCTC 8325 / PS 47) OX=93061 GN=SAOUHSC_01602 PE=4 SV=1	1	4	38.39	0	106650000	62784000	20312000	0	0	0	0	0	0	0
Q2G190	20.8635	Q2G190_STAA8	SAOUHSC_00256	tr|Q2G190|Q2G190_STAA8	tr|Q2G190|Q2G190_STAA8	tr|Q2G190|Q2G190_STAA8 Peptidase C51 domain-containing protein OS=Staphylococcus aureus (strain NCTC 8325 / PS 47) OX=93061 GN=SAOUHSC_00256 PE=4 SV=1	1	4	33.032	0	28645000	45981000	23295000	0	28298000	0	0	0	0	0
Q2FV42	20.7426	Y2897_STAA8	SAOUHSC_02897	sp|Q2FV42|Y2897_STAA8	sp|Q2FV42|Y2897_STAA8	sp|Q2FV42|Y2897_STAA8 HTH-type transcriptional regulator SAOUHSC_02897 OS=Staphylococcus aureus (strain NCTC 8325 / PS 47) OX=93061 GN=SAOUHSC_02897 PE=4 SV=1	1	1	22.26	0	0	0	21065000	15215000	29120000	0	0	0	0	0
Q9KJN3	20.6374	ARLS_STAA8	arlS	sp|Q9KJN3|ARLS_STAA8	sp|Q9KJN3|ARLS_STAA8	sp|Q9KJN3|ARLS_STAA8 Signal transduction histidine-protein kinase ArlS OS=Staphylococcus aureus (strain NCTC 8325 / PS 47) OX=93061 GN=arlS PE=1 SV=1	1	4	52.399	0	35692000	0	19522000	53748000	100450000	0	0	0	0	0
Q2G1Q8	20.6295	Q2G1Q8_STAA8	SAOUHSC_00044	tr|Q2G1Q8|Q2G1Q8_STAA8	tr|Q2G1Q8|Q2G1Q8_STAA8	tr|Q2G1Q8|Q2G1Q8_STAA8 HTH lysR-type domain-containing protein OS=Staphylococcus aureus (strain NCTC 8325 / PS 47) OX=93061 GN=SAOUHSC_00044 PE=3 SV=1	1	5	33.41	0.0019881	31596000	38206000	25185000	0	53352000	0	0	0	0	0
Q2G1C8	20.5651	Q2G1C8_STAA8	SAOUHSC_00197	tr|Q2G1C8|Q2G1C8_STAA8	tr|Q2G1C8|Q2G1C8_STAA8	tr|Q2G1C8|Q2G1C8_STAA8 Uncharacterized protein OS=Staphylococcus aureus (strain NCTC 8325 / PS 47) OX=93061 GN=SAOUHSC_00197 PE=3 SV=1	1	4	44.728	0	71007000	60518000	66799000	25842000	20850000	0	0	0	0	0
Q2FZQ5	20.479	Q2FZQ5_STAA8	SAOUHSC_00945	tr|Q2FZQ5|Q2FZQ5_STAA8	tr|Q2FZQ5|Q2FZQ5_STAA8	tr|Q2FZQ5|Q2FZQ5_STAA8 Magnesium transporter MgtE OS=Staphylococcus aureus (strain NCTC 8325 / PS 47) OX=93061 GN=SAOUHSC_00945 PE=3 SV=1	1	5	51.435	0	0	17337000	17766000	0	49793000	0	0	0	0	0
Q2G1K2	20.3039	Q2G1K2_STAA8	SAOUHSC_00120	tr|Q2G1K2|Q2G1K2_STAA8	tr|Q2G1K2|Q2G1K2_STAA8	tr|Q2G1K2|Q2G1K2_STAA8 UDP-N-acetylglucosamine 2-epimerase OS=Staphylococcus aureus (strain NCTC 8325 / PS 47) OX=93061 GN=SAOUHSC_00120 PE=3 SV=1	1	7	42.851	0	55514000	82190000	9223600	0	41008000	0	0	0	0	0
Q2FUW8	20.2402	Q2FUW8_STAA8	gtfB	tr|Q2FUW8|Q2FUW8_STAA8	tr|Q2FUW8|Q2FUW8_STAA8	tr|Q2FUW8|Q2FUW8_STAA8 UDP-N-acetylglucosamine--peptide N-acetylglucosaminyltransferase stabilizing protein GtfB OS=Staphylococcus aureus (strain NCTC 8325 / PS 47) OX=93061 GN=gtfB PE=3 SV=1	1	3	53.028	0	22201000	33029000	30775000	74298000	35655000	0	0	0	0	0
Q2G0Q2	20.0966	Q2G0Q2_STAA8	SAOUHSC_00497	tr|Q2G0Q2|Q2G0Q2_STAA8	tr|Q2G0Q2|Q2G0Q2_STAA8	tr|Q2G0Q2|Q2G0Q2_STAA8 HTH-type transcriptional regulator NorG OS=Staphylococcus aureus (strain NCTC 8325 / PS 47) OX=93061 GN=SAOUHSC_00497 PE=3 SV=1	1	3	53.954	0	0	24723000	16368000	21944000	81331000	0	0	0	0	0
O05154	20.0829	TAGX_STAA8	tagX	sp|O05154|TAGX_STAA8	sp|O05154|TAGX_STAA8	sp|O05154|TAGX_STAA8 Putative glycosyltransferase TagX OS=Staphylococcus aureus (strain NCTC 8325 / PS 47) OX=93061 GN=tagX PE=3 SV=2	1	4	41.138	0	0	43751000	13499000	15232000	47330000	0	0	0	0	0
Q2FZM4	19.9418	Q2FZM4_STAA8	SAOUHSC_00976	tr|Q2FZM4|Q2FZM4_STAA8	tr|Q2FZM4|Q2FZM4_STAA8	tr|Q2FZM4|Q2FZM4_STAA8 Fe/B12 periplasmic-binding domain-containing protein OS=Staphylococcus aureus (strain NCTC 8325 / PS 47) OX=93061 GN=SAOUHSC_00976 PE=4 SV=1	1	1	32.035	0.0068408	0	23863000	12166000	24745000	22914000	0	0	0	0	0
Q2G1D9	19.6278	Q2G1D9_STAA8	SAOUHSC_00186	tr|Q2G1D9|Q2G1D9_STAA8	tr|Q2G1D9|Q2G1D9_STAA8	tr|Q2G1D9|Q2G1D9_STAA8 Lipoprotein, putative OS=Staphylococcus aureus (strain NCTC 8325 / PS 47) OX=93061 GN=SAOUHSC_00186 PE=4 SV=1	1	2	36.932	0	0	22381000	0	14501000	17446000	0	0	0	0	0
Q2FVE5	19.605	Q2FVE5_STAA8	SAOUHSC_02769	tr|Q2FVE5|Q2FVE5_STAA8	tr|Q2FVE5|Q2FVE5_STAA8	tr|Q2FVE5|Q2FVE5_STAA8 Uncharacterized protein OS=Staphylococcus aureus (strain NCTC 8325 / PS 47) OX=93061 GN=SAOUHSC_02769 PE=4 SV=1	1	3	31.096	0	13424000	0	12406000	17758000	0	0	0	0	0	0

## Sheet: MoreNTWT_ThanNTCRIS
General information							Statistic information			pSD1					sgRNA NADK
Uniprot	Protein Name	Gene Name	Fasta headers	Majority protein IDs	Number of peptide identified	Mol. weight [kDa]	log2 [WT]/ [CRIS]	p value	Adjusted p value	WT_NT_1	WT_NT_2	WT_NT_3	WT_NT_4	WT_NT_5	CRIS_NT_1	CRIS_NT_2	CRIS_NT_3	CRIS_NT_4	CRIS_NT_5
					all sample combined	Theoretical				Intensity	Intensity	Intensity	Intensity	Intensity	Intensity	Intensity	Intensity	Intensity	Intensity
Q2FVK1	HLGB_STAA8	hlgB	sp|Q2FVK1|HLGB_STAA8 Gamma-hemolysin component B OS=Staphylococcus aureus (strain NCTC 8325 / PS 47) OX=93061 GN=hlgB PE=1 SV=1	sp|Q2FVK1|HLGB_STAA8	20	36.711	7.88465	1.1861e-10	3.85114e-10	4301000000	4863500000	2824900000	3502300000	3546700000	0	0	0	0	11854000
Q2FVP4	Q2FVP4_STAA8	SAOUHSC_02658	tr|Q2FVP4|Q2FVP4_STAA8 Membrane protein, putative OS=Staphylococcus aureus (strain NCTC 8325 / PS 47) OX=93061 GN=SAOUHSC_02658 PE=4 SV=1	tr|Q2FVP4|Q2FVP4_STAA8	16	47.827	7.37221	1.49722e-09	2.40902e-09	1879000000	2241100000	1920600000	1891600000	3923400000	0	0	0	0	11157000
Q2G1X0	HLA_STAA8	hly	sp|Q2G1X0|HLA_STAA8 Alpha-hemolysin OS=Staphylococcus aureus (strain NCTC 8325 / PS 47) OX=93061 GN=hly PE=1 SV=1	sp|Q2G1X0|HLA_STAA8	23	35.973	6.98874	7.33475e-11	3.85114e-10	3964000000	6917800000	3279300000	5019300000	4543500000	0	0	0	0	27610000
Q2G170	Q2G170_STAA8	SAOUHSC_00284	tr|Q2G170|Q2G170_STAA8 5-nucleotidase, lipoprotein e(P4) family OS=Staphylococcus aureus (strain NCTC 8325 / PS 47) OX=93061 GN=SAOUHSC_00284 PE=4 SV=1	tr|Q2G170|Q2G170_STAA8	10	33.352	5.78389	1.73121e-09	2.40902e-09	1012500000	1059800000	866780000	917280000	1424000000	14933000	14073000	26973000	0	23165000
Q2G189	ESXA_STAA8	esxA	sp|Q2G189|ESXA_STAA8 Type VII secretion system extracellular protein A OS=Staphylococcus aureus (strain NCTC 8325 / PS 47) OX=93061 GN=esxA PE=1 SV=1	sp|Q2G189|ESXA_STAA8	12	11.036	5.0431	3.35792e-10	8.17712e-10	25856000000	31106000000	20384000000	24558000000	24357000000	802140000	628590000	962710000	585740000	885260000
Q2FXE8	Q2FXE8_STAA8	SAOUHSC_01901	tr|Q2FXE8|Q2FXE8_STAA8 Uncharacterized protein OS=Staphylococcus aureus (strain NCTC 8325 / PS 47) OX=93061 GN=SAOUHSC_01901 PE=4 SV=1	tr|Q2FXE8|Q2FXE8_STAA8	32	25.705	5.02298	1.15999e-10	3.85114e-10	44191000000	51192000000	36674000000	43339000000	43893000000	1381000000	1358100000	1214200000	1143100000	1668500000
Q2G1G5	PTXBC_STAA8	SAOUHSC_00158	sp|Q2G1G5|PTXBC_STAA8 PTS system MurNAc-GlcNAc-specific EIIBC component OS=Staphylococcus aureus (strain NCTC 8325 / PS 47) OX=93061 GN=SAOUHSC_00158 PE=3 SV=1	sp|Q2G1G5|PTXBC_STAA8	8	50.664	4.888	1.02542e-06	3.17089e-07	897340000	899950000	881760000	1626300000	1832700000	55543000	0	0	34148000	17904000
Q2FVV2	Q2FVV2_STAA8	SAOUHSC_02589	tr|Q2FVV2|Q2FVV2_STAA8 Uncharacterized protein OS=Staphylococcus aureus (strain NCTC 8325 / PS 47) OX=93061 GN=SAOUHSC_02589 PE=4 SV=1	tr|Q2FVV2|Q2FVV2_STAA8	8	33.004	4.59584	6.80179e-07	2.36622e-07	383030000	538850000	410450000	567720000	880750000	0	13245000	0	0	0
Q2FV64	COPA_STAA8	copA	sp|Q2FV64|COPA_STAA8 Copper-exporting P-type ATPase OS=Staphylococcus aureus (strain NCTC 8325 / PS 47) OX=93061 GN=copA PE=1 SV=1	sp|Q2FV64|COPA_STAA8	17	86.743	4.57012	1.23917e-05	2.23526e-06	309380000	395150000	660550000	824540000	1493000000	0	41273000	0	32388000	13729000
Q2G1E5	Q2G1E5_STAA8	SAOUHSC_00180	tr|Q2G1E5|Q2G1E5_STAA8 Uncharacterized protein OS=Staphylococcus aureus (strain NCTC 8325 / PS 47) OX=93061 GN=SAOUHSC_00180 PE=4 SV=1	tr|Q2G1E5|Q2G1E5_STAA8	12	38.557	4.49338	9.62734e-07	3.07465e-07	280200000	427160000	536190000	432800000	985180000	18649000	15757000	34496000	0	22387000
Q2FVA8	Q2FVA8_STAA8	SAOUHSC_02825	tr|Q2FVA8|Q2FVA8_STAA8 VOC domain-containing protein OS=Staphylococcus aureus (strain NCTC 8325 / PS 47) OX=93061 GN=SAOUHSC_02825 PE=4 SV=1	tr|Q2FVA8|Q2FVA8_STAA8	12	32.543	4.45025	9.56773e-07	3.07465e-07	1265400000	1349900000	573920000	1644000000	1152900000	91611000	26918000	0	0	41355000
Q2G136	Q2G136_STAA8	SAOUHSC_00319	tr|Q2G136|Q2G136_STAA8 Bac_luciferase domain-containing protein OS=Staphylococcus aureus (strain NCTC 8325 / PS 47) OX=93061 GN=SAOUHSC_00319 PE=4 SV=1	tr|Q2G136|Q2G136_STAA8	10	39.171	4.14083	3.1259e-09	3.80605e-09	250960000	236830000	220550000	264180000	358740000	15966000	0	0	0	12828000
Q2FWN9	LUKL2_STAA8	SAOUHSC_02243	sp|Q2FWN9|LUKL2_STAA8 Uncharacterized leukocidin-like protein 2 OS=Staphylococcus aureus (strain NCTC 8325 / PS 47) OX=93061 GN=SAOUHSC_02243 PE=1 SV=1	sp|Q2FWN9|LUKL2_STAA8	17	40.434	3.88373	7.23279e-08	4.14425e-08	2916800000	2925700000	2668700000	3038200000	2912400000	133740000	275820000	248890000	171790000	182310000
Q2FVK3	Q2FVK3_STAA8	SAOUHSC_02708	tr|Q2FVK3|Q2FVK3_STAA8 Gamma-hemolysin h-gamma-ii subunit, putative OS=Staphylococcus aureus (strain NCTC 8325 / PS 47) OX=93061 GN=SAOUHSC_02708 PE=3 SV=1	tr|Q2FVK3|Q2FVK3_STAA8	12	34.955	3.84364	1.66507e-08	1.47445e-08	789280000	891990000	767290000	955320000	856610000	0	46390000	0	0	0
Q2FWX5	Q2FWX5_STAA8	SAOUHSC_02146	tr|Q2FWX5|Q2FWX5_STAA8 Uncharacterized protein OS=Staphylococcus aureus (strain NCTC 8325 / PS 47) OX=93061 GN=SAOUHSC_02146 PE=4 SV=1	tr|Q2FWX5|Q2FWX5_STAA8	11	40.354	3.68536	4.88883e-06	1.08228e-06	369950000	551260000	195970000	453740000	265190000	24502000	0	17318000	0	53532000
Q2G205	Q2G205_STAA8	SAOUHSC_02808	tr|Q2G205|Q2G205_STAA8 Gluconate kinase OS=Staphylococcus aureus (strain NCTC 8325 / PS 47) OX=93061 GN=SAOUHSC_02808 PE=3 SV=1	tr|Q2G205|Q2G205_STAA8	11	58.094	3.65184	2.06443e-05	3.35149e-06	79799000	491640000	215760000	406360000	329140000	0	21300000	0	16872000	21968000
Q2G2E5	Q2G2E5_STAA8	SAOUHSC_00647	tr|Q2G2E5|Q2G2E5_STAA8 Uncharacterized protein OS=Staphylococcus aureus (strain NCTC 8325 / PS 47) OX=93061 GN=SAOUHSC_00647 PE=4 SV=1	tr|Q2G2E5|Q2G2E5_STAA8	15	64.05	3.63885	9.7564e-05	1.25873e-05	185860000	289460000	298910000	265850000	1075400000	13931000	0	26924000	0	51205000
Q2G1N4	Q2G1N4_STAA8	SAOUHSC_00074	tr|Q2G1N4|Q2G1N4_STAA8 Periplasmic binding protein, putative OS=Staphylococcus aureus (strain NCTC 8325 / PS 47) OX=93061 GN=SAOUHSC_00074 PE=4 SV=1	tr|Q2G1N4|Q2G1N4_STAA8	17	36.744	3.44031	1.86919e-09	2.42763e-09	3032300000	2778300000	2596400000	3096200000	2971000000	246510000	237640000	255800000	293080000	303970000
Q2G2W5	Q2G2W5_STAA8	SAOUHSC_02630	tr|Q2G2W5|Q2G2W5_STAA8 Biotin_lipoyl_2 domain-containing protein OS=Staphylococcus aureus (strain NCTC 8325 / PS 47) OX=93061 GN=SAOUHSC_02630 PE=4 SV=1	tr|Q2G2W5|Q2G2W5_STAA8	8	23.024	3.38403	0.000291907	3.12459e-05	681830000	974030000	172520000	1197500000	605850000	91457000	30950000	71323000	29229000	113590000
Q2G1E9	Q2G1E9_STAA8	SAOUHSC_00176	tr|Q2G1E9|Q2G1E9_STAA8 Maltodextrin-binding protein OS=Staphylococcus aureus (strain NCTC 8325 / PS 47) OX=93061 GN=SAOUHSC_00176 PE=1 SV=1	tr|Q2G1E9|Q2G1E9_STAA8	15	47.85	3.30851	2.21694e-07	1.0661e-07	243660000	451760000	327270000	377510000	431890000	45205000	41423000	43025000	0	24386000
Q2G0D1	SARX_STAA8	sarX	sp|Q2G0D1|SARX_STAA8 HTH-type transcriptional regulator SarX OS=Staphylococcus aureus (strain NCTC 8325 / PS 47) OX=93061 GN=sarX PE=1 SV=2	sp|Q2G0D1|SARX_STAA8	8	14.178	3.29807	2.61128e-06	6.69359e-07	602550000	629230000	835540000	804190000	1621200000	66189000	80656000	88213000	94582000	100720000
Q2FV63	COPZ_STAA8	copZ	sp|Q2FV63|COPZ_STAA8 Copper chaperone CopZ OS=Staphylococcus aureus (strain NCTC 8325 / PS 47) OX=93061 GN=copZ PE=1 SV=1	sp|Q2FV63|COPZ_STAA8	6	7.2369	3.23751	0.00133307	0.000108661	12667000000	13753000000	10992000000	11033000000	12578000000	213490000	2708500000	2395300000	1635000000	1572300000
Q2G1F0	Q2G1F0_STAA8	SAOUHSC_00175	tr|Q2G1F0|Q2G1F0_STAA8 Multiple sugar-binding transport ATP-binding protein, putative OS=Staphylococcus aureus (strain NCTC 8325 / PS 47) OX=93061 GN=SAOUHSC_00175 PE=4 SV=1	tr|Q2G1F0|Q2G1F0_STAA8	8	41.334	3.09634	1.35588e-05	2.33756e-06	242160000	321870000	146220000	360600000	322730000	21433000	22208000	47615000	21734000	58846000
Q2FWP0	LUKL1_STAA8	SAOUHSC_02241	sp|Q2FWP0|LUKL1_STAA8 Uncharacterized leukocidin-like protein 1 OS=Staphylococcus aureus (strain NCTC 8325 / PS 47) OX=93061 GN=SAOUHSC_02241 PE=1 SV=1	sp|Q2FWP0|LUKL1_STAA8	12	38.686	3.08853	1.28061e-05	2.25319e-06	1153100000	3258500000	2168700000	1231400000	2464200000	278190000	158240000	188450000	239800000	279100000
Q2FV54	OATA_STAA8	oatA	sp|Q2FV54|OATA_STAA8 O-acetyltransferase OatA OS=Staphylococcus aureus (strain NCTC 8325 / PS 47) OX=93061 GN=oatA PE=1 SV=1	sp|Q2FV54|OATA_STAA8	8	69.098	3.06915	0.000140854	1.74779e-05	388670000	408510000	342380000	279020000	659180000	82382000	41303000	0	17112000	76329000
Q2G1E4	Q2G1E4_STAA8	SAOUHSC_00181	tr|Q2G1E4|Q2G1E4_STAA8 AP_endonuc_2 domain-containing protein OS=Staphylococcus aureus (strain NCTC 8325 / PS 47) OX=93061 GN=SAOUHSC_00181 PE=4 SV=1	tr|Q2G1E4|Q2G1E4_STAA8	8	36.671	2.95828	7.84541e-05	1.05406e-05	553440000	594390000	248060000	490940000	188900000	66974000	54250000	27080000	0	52103000
Q2G0B1	MGRA_STAA8	mgrA	sp|Q2G0B1|MGRA_STAA8 HTH-type transcriptional regulator MgrA OS=Staphylococcus aureus (strain NCTC 8325 / PS 47) OX=93061 GN=mgrA PE=1 SV=3	sp|Q2G0B1|MGRA_STAA8	14	17.089	2.95244	2.65509e-07	1.12445e-07	12465000000	17942000000	10830000000	12809000000	10283000000	2062600000	1094600000	1850000000	1520500000	1807700000
Q2G1E6	Q2G1E6_STAA8	SAOUHSC_00179	tr|Q2G1E6|Q2G1E6_STAA8 Uncharacterized protein OS=Staphylococcus aureus (strain NCTC 8325 / PS 47) OX=93061 GN=SAOUHSC_00179 PE=4 SV=1	tr|Q2G1E6|Q2G1E6_STAA8	15	39.18	2.94628	3.45677e-06	8.52437e-07	2410400000	1593900000	2143900000	2549000000	1677400000	356560000	182660000	275180000	226770000	318560000
Q2G2R8	SSPP_STAA8	sspP	sp|Q2G2R8|SSPP_STAA8 Staphopain A OS=Staphylococcus aureus (strain NCTC 8325 / PS 47) OX=93061 GN=sspP PE=1 SV=1	sp|Q2G2R8|SSPP_STAA8	14	44.262	2.89589	1.40349e-06	4.08087e-07	273400000	486580000	330280000	299640000	303310000	0	37223000	69703000	49585000	30980000
Q2G135	Q2G135_STAA8	SAOUHSC_00320	tr|Q2G135|Q2G135_STAA8 FMN-dependent NADPH-azoreductase OS=Staphylococcus aureus (strain NCTC 8325 / PS 47) OX=93061 GN=SAOUHSC_00320 PE=3 SV=1	tr|Q2G135|Q2G135_STAA8	5	21.314	2.89383	2.55349e-05	4.04435e-06	29220000	105000000	76863000	130400000	101010000	10819000	0	0	0	10429000
Q2G0C7	Q2G0C7_STAA8	SAOUHSC_00678	tr|Q2G0C7|Q2G0C7_STAA8 DUF402 domain-containing protein OS=Staphylococcus aureus (strain NCTC 8325 / PS 47) OX=93061 GN=SAOUHSC_00678 PE=4 SV=1	tr|Q2G0C7|Q2G0C7_STAA8	4	25.416	2.83413	0.075797	0.00411317	51852000	2566400000	27439000	39686000	1986000000	24156000	0	18922000	40502000	32877000
Q2G277	Q2G277_STAA8	SAOUHSC_00774	tr|Q2G277|Q2G277_STAA8 Uncharacterized protein OS=Staphylococcus aureus (strain NCTC 8325 / PS 47) OX=93061 GN=SAOUHSC_00774 PE=4 SV=1	tr|Q2G277|Q2G277_STAA8	9	25.704	2.77396	0.000250223	2.75406e-05	66025000	65045000	135270000	35205000	73309000	0	10625000	6494100	14399000	0
Q2G0L2	Q2G0L2_STAA8	SAOUHSC_00548	tr|Q2G0L2|Q2G0L2_STAA8 Glycos_transf_1 domain-containing protein OS=Staphylococcus aureus (strain NCTC 8325 / PS 47) OX=93061 GN=SAOUHSC_00548 PE=4 SV=1	tr|Q2G0L2|Q2G0L2_STAA8	13	58.418	2.76961	0.00161954	0.000129307	253640000	1184300000	198230000	1398000000	1094100000	0	56489000	139160000	49067000	153560000
Q2G104	Q2G104_STAA8	SAOUHSC_00357	tr|Q2G104|Q2G104_STAA8 HTH cro/C1-type domain-containing protein OS=Staphylococcus aureus (strain NCTC 8325 / PS 47) OX=93061 GN=SAOUHSC_00357 PE=4 SV=1	tr|Q2G104|Q2G104_STAA8	5	10.789	2.69228	0.000516986	5.05038e-05	5974600000	12484000000	6476200000	9118300000	6398900000	1010800000	1951800000	593530000	715910000	2980700000
Q2FVD5	Y2778_STAA8	SAOUHSC_02778	sp|Q2FVD5|Y2778_STAA8 Uncharacterized oxidoreductase SAOUHSC_02778 OS=Staphylococcus aureus (strain NCTC 8325 / PS 47) OX=93061 GN=SAOUHSC_02778 PE=3 SV=1	sp|Q2FVD5|Y2778_STAA8	11	24.604	2.66839	5.96173e-08	3.62945e-08	8084200000	7826900000	5605600000	6108200000	7901500000	1006600000	1178700000	1139600000	933580000	1306100000
Q2FWW6	Q2FWW6_STAA8	SAOUHSC_02155	tr|Q2FWW6|Q2FWW6_STAA8 HTH gntR-type domain-containing protein OS=Staphylococcus aureus (strain NCTC 8325 / PS 47) OX=93061 GN=SAOUHSC_02155 PE=4 SV=1	tr|Q2FWW6|Q2FWW6_STAA8	4	14.532	2.66589	4.28372e-07	1.63633e-07	85443000	189360000	68619000	150570000	161120000	0	17777000	0	20087000	19016000
Q2FVF4	Q2FVF4_STAA8	SAOUHSC_02760	tr|Q2FVF4|Q2FVF4_STAA8 Glutamate synthase alpha subunit, putative OS=Staphylococcus aureus (strain NCTC 8325 / PS 47) OX=93061 GN=SAOUHSC_02760 PE=3 SV=1	tr|Q2FVF4|Q2FVF4_STAA8	6	58.439	2.65858	0.00469611	0.000338839	0	399650000	106250000	27930000	175050000	0	0	0	15350000	0
Q2FVV8	Q2FVV8_STAA8	SAOUHSC_02583	tr|Q2FVV8|Q2FVV8_STAA8 Transcriptional regulator, putative OS=Staphylococcus aureus (strain NCTC 8325 / PS 47) OX=93061 GN=SAOUHSC_02583 PE=3 SV=1	tr|Q2FVV8|Q2FVV8_STAA8	11	33.804	2.6481	1.66377e-06	4.69746e-07	967850000	2015000000	1279200000	1767000000	1408400000	173870000	315860000	202430000	251320000	229600000
Q2G1H1	Q2G1H1_STAA8	SAOUHSC_00152	tr|Q2G1H1|Q2G1H1_STAA8 Isochorismatase domain-containing protein OS=Staphylococcus aureus (strain NCTC 8325 / PS 47) OX=93061 GN=SAOUHSC_00152 PE=4 SV=1	tr|Q2G1H1|Q2G1H1_STAA8	4	18.923	2.58713	0.000261798	2.84926e-05	351370000	164180000	303180000	179380000	101950000	0	27166000	0	0	37577000
Q2FUW1	SRAP_STAA8	sraP	sp|Q2FUW1|SRAP_STAA8 Serine-rich adhesin for platelets OS=Staphylococcus aureus (strain NCTC 8325 / PS 47) OX=93061 GN=sraP PE=1 SV=1	sp|Q2FUW1|SRAP_STAA8	11	228.04	2.4927	0.00113799	9.63895e-05	69199000	165360000	55891000	82141000	115200000	4618700	0	21052000	19834000	31100000
Q2G2R7	Q2G2R7_STAA8	SAOUHSC_02129	tr|Q2G2R7|Q2G2R7_STAA8 Staphostatin_A domain-containing protein OS=Staphylococcus aureus (strain NCTC 8325 / PS 47) OX=93061 GN=SAOUHSC_02129 PE=4 SV=1	tr|Q2G2R7|Q2G2R7_STAA8	4	12.607	2.44704	3.24141e-06	8.09579e-07	237630000	267600000	133750000	149370000	195190000	27283000	0	37397000	31527000	49218000
Q2G1G6	MURQ_STAA8	murQ	sp|Q2G1G6|MURQ_STAA8 N-acetylmuramic acid 6-phosphate etherase OS=Staphylococcus aureus (strain NCTC 8325 / PS 47) OX=93061 GN=murQ PE=3 SV=2	sp|Q2G1G6|MURQ_STAA8	4	32.382	2.41344	1.15037e-08	1.08801e-08	103860000	0	90842000	130750000	123070000	0	17519000	0	0	27608000
Q2FUX0	Q2FUX0_STAA8	SAOUHSC_02975	tr|Q2FUX0|Q2FUX0_STAA8 EIIA OS=Staphylococcus aureus (strain NCTC 8325 / PS 47) OX=93061 GN=SAOUHSC_02975 PE=4 SV=1	tr|Q2FUX0|Q2FUX0_STAA8	12	69.882	2.34538	0.0002182	2.45713e-05	0	123650000	111470000	0	75754000	40973000	0	0	10593000	23527000
Q2FZX9	NMO_STAA8	SAOUHSC_00855	sp|Q2FZX9|NMO_STAA8 Probable nitronate monooxygenase OS=Staphylococcus aureus (strain NCTC 8325 / PS 47) OX=93061 GN=SAOUHSC_00855 PE=3 SV=1	sp|Q2FZX9|NMO_STAA8	6	38.548	2.33098	1.61062e-05	2.72844e-06	366230000	402080000	375050000	259060000	382190000	72681000	104590000	71200000	49094000	63818000
Q2FUY1	ARCR_STAA8	arcR	sp|Q2FUY1|ARCR_STAA8 HTH-type transcriptional regulator ArcR OS=Staphylococcus aureus (strain NCTC 8325 / PS 47) OX=93061 GN=arcR PE=1 SV=1	sp|Q2FUY1|ARCR_STAA8	5	27.428	2.31388	0.000878166	7.70624e-05	191530000	179770000	83858000	187970000	507910000	0	0	43078000	21510000	72688000
Q2FWW7	Q2FWW7_STAA8	SAOUHSC_02154	tr|Q2FWW7|Q2FWW7_STAA8 ABC transporter, ATP-binding protein, putative OS=Staphylococcus aureus (strain NCTC 8325 / PS 47) OX=93061 GN=SAOUHSC_02154 PE=4 SV=1	tr|Q2FWW7|Q2FWW7_STAA8	9	34.52	2.28227	0.006547	0.000447525	21553000	51887000	188800000	141150000	134100000	0	0	0	0	12553000
Q2G019	Q2G019_STAA8	SAOUHSC_00808	tr|Q2G019|Q2G019_STAA8 DUF5067 domain-containing protein OS=Staphylococcus aureus (strain NCTC 8325 / PS 47) OX=93061 GN=SAOUHSC_00808 PE=1 SV=1	tr|Q2G019|Q2G019_STAA8	11	28.419	2.26372	0.00758846	0.000508019	441270000	535780000	141780000	391930000	574670000	165320000	74533000	51684000	22925000	202470000
Q2G155	LIP2_STAA8	lip2	sp|Q2G155|LIP2_STAA8 Lipase 2 OS=Staphylococcus aureus (strain NCTC 8325 / PS 47) OX=93061 GN=lip2 PE=1 SV=1	sp|Q2G155|LIP2_STAA8	12	76.387	2.26255	0.000233476	2.5991e-05	76358000	216960000	188660000	172600000	83700000	21997000	0	0	0	0
Q2FZZ6	Q2FZZ6_STAA8	SAOUHSC_00838	tr|Q2FZZ6|Q2FZZ6_STAA8 Uncharacterized protein OS=Staphylococcus aureus (strain NCTC 8325 / PS 47) OX=93061 GN=SAOUHSC_00838 PE=4 SV=1	tr|Q2FZZ6|Q2FZZ6_STAA8	2	33.501	2.25921	3.9499e-06	9.49992e-07	67846000	60684000	75485000	79516000	129000000	17427000	0	0	15329000	0
Q2FWE1	PRMC_STAA8	prmC	sp|Q2FWE1|PRMC_STAA8 Release factor glutamine methyltransferase OS=Staphylococcus aureus (strain NCTC 8325 / PS 47) OX=93061 GN=prmC PE=3 SV=2	sp|Q2FWE1|PRMC_STAA8	5	31.73	2.22275	0.0705356	0.00383835	17926000	0	0	1172200000	33422000	0	29159000	27010000	0	0
Q2FZT6	ADDB_STAA8	addB	sp|Q2FZT6|ADDB_STAA8 ATP-dependent helicase/deoxyribonuclease subunit B OS=Staphylococcus aureus (strain NCTC 8325 / PS 47) OX=93061 GN=addB PE=3 SV=1	sp|Q2FZT6|ADDB_STAA8	9	134.5	2.19459	0.0544955	0.00301604	218510000	182120000	147810000	0	68676000	10526000	192440000	12574000	11609000	106130000
Q2G220	Q2G220_STAA8	SAOUHSC_02980	tr|Q2G220|Q2G220_STAA8 Isochorismatase domain-containing protein OS=Staphylococcus aureus (strain NCTC 8325 / PS 47) OX=93061 GN=SAOUHSC_02980 PE=4 SV=1	tr|Q2G220|Q2G220_STAA8	7	20.729	2.18927	2.38187e-07	1.0661e-07	312120000	547440000	256420000	380200000	438590000	81191000	72659000	84236000	70257000	106050000
Q2FVE2	Q2FVE2_STAA8	SAOUHSC_02772	tr|Q2FVE2|Q2FVE2_STAA8 Uncharacterized protein OS=Staphylococcus aureus (strain NCTC 8325 / PS 47) OX=93061 GN=SAOUHSC_02772 PE=4 SV=1	tr|Q2FVE2|Q2FVE2_STAA8	5	23.385	2.16138	0.00316414	0.000236175	37541000	217250000	61290000	122520000	216120000	0	48654000	20530000	0	15673000
Q2G0G6	Q2G0G6_STAA8	SAOUHSC_00603	tr|Q2G0G6|Q2G0G6_STAA8 Aldo_ket_red domain-containing protein OS=Staphylococcus aureus (strain NCTC 8325 / PS 47) OX=93061 GN=SAOUHSC_00603 PE=4 SV=1	tr|Q2G0G6|Q2G0G6_STAA8	20	35.459	2.15096	2.36389e-07	1.0661e-07	3370200000	4086700000	3306600000	5414600000	3246400000	860830000	891840000	977930000	777180000	794020000
Q2FYS7	Y1349_STAA8	SAOUHSC_01349	sp|Q2FYS7|Y1349_STAA8 Uncharacterized protein SAOUHSC_01349 OS=Staphylococcus aureus (strain NCTC 8325 / PS 47) OX=93061 GN=SAOUHSC_01349 PE=3 SV=1	sp|Q2FYS7|Y1349_STAA8	6	11.496	2.11686	0.000150451	1.8099e-05	2322100000	2460300000	1285100000	1501300000	2084500000	283230000	361340000	657840000	299580000	741980000
Q2FZI0	Q2FZI0_STAA8	SAOUHSC_01024	tr|Q2FZI0|Q2FZI0_STAA8 Uncharacterized protein OS=Staphylococcus aureus (strain NCTC 8325 / PS 47) OX=93061 GN=SAOUHSC_01024 PE=4 SV=1	tr|Q2FZI0|Q2FZI0_STAA8	6	5.1626	2.10218	0.160227	0.00832385	1345900000	1362900000	192760000	878330000	1052500000	458310000	175120000	523610000	869480000	6130800
Q9KJN4	ARLR_STAA8	arlR	sp|Q9KJN4|ARLR_STAA8 Response regulator ArlR OS=Staphylococcus aureus (strain NCTC 8325 / PS 47) OX=93061 GN=arlR PE=1 SV=1	sp|Q9KJN4|ARLR_STAA8	11	25.498	2.09079	1.38482e-07	6.91749e-08	709600000	728810000	553870000	664930000	932200000	176070000	149730000	170800000	141930000	198070000
Q2FW57	Q2FW57_STAA8	SAOUHSC_02460	tr|Q2FW57|Q2FW57_STAA8 Aldo_ket_red domain-containing protein OS=Staphylococcus aureus (strain NCTC 8325 / PS 47) OX=93061 GN=SAOUHSC_02460 PE=4 SV=1	tr|Q2FW57|Q2FW57_STAA8	11	32.202	2.08845	6.70267e-05	9.4621e-06	738520000	631260000	313670000	804780000	892280000	174250000	204970000	167840000	129590000	97155000
Q2FV08	Q2FV08_STAA8	SAOUHSC_02935	tr|Q2FV08|Q2FV08_STAA8 HTH-type transcriptional regulator OS=Staphylococcus aureus (strain NCTC 8325 / PS 47) OX=93061 GN=SAOUHSC_02935 PE=3 SV=1	tr|Q2FV08|Q2FV08_STAA8	9	21.742	2.08032	0.00125132	0.00010409	312190000	217560000	157850000	240760000	239590000	70750000	31061000	132270000	25901000	0
Q2FYV7	Q2FYV7_STAA8	SAOUHSC_01317	tr|Q2FYV7|Q2FYV7_STAA8 Uncharacterized protein OS=Staphylococcus aureus (strain NCTC 8325 / PS 47) OX=93061 GN=SAOUHSC_01317 PE=4 SV=1	tr|Q2FYV7|Q2FYV7_STAA8	14	32.851	2.07528	0.00152147	0.000122989	1006100000	1397500000	1644800000	1531200000	1629600000	599700000	167570000	211690000	287710000	709290000
Q2FZ60	RL28_STAA8	rpmB	sp|Q2FZ60|RL28_STAA8 50S ribosomal protein L28 OS=Staphylococcus aureus (strain NCTC 8325 / PS 47) OX=93061 GN=rpmB PE=1 SV=1	sp|Q2FZ60|RL28_STAA8	10	6.9771	2.03002	0.156904	0.00817302	546960000	1265900000	1303800000	1627100000	2613700000	24905000	1180500000	69552000	1921500000	859900000
Q2FWW9	Q2FWW9_STAA8	SAOUHSC_02152	tr|Q2FWW9|Q2FWW9_STAA8 ABC transporter, ATP-binding protein, putative OS=Staphylococcus aureus (strain NCTC 8325 / PS 47) OX=93061 GN=SAOUHSC_02152 PE=1 SV=1	tr|Q2FWW9|Q2FWW9_STAA8	19	32.952	2.02371	0.00355886	0.000263618	1233200000	1408400000	1680000000	7107700000	1555600000	567550000	421410000	316030000	518330000	740740000
Q9F0R1	SARR_STAA8	sarR	sp|Q9F0R1|SARR_STAA8 HTH-type transcriptional regulator SarR OS=Staphylococcus aureus (strain NCTC 8325 / PS 47) OX=93061 GN=sarR PE=1 SV=3	sp|Q9F0R1|SARR_STAA8	10	13.669	2.00807	1.34561e-06	3.97187e-07	4988200000	7351200000	3935900000	6041900000	5284500000	1165300000	1025900000	1755000000	1758500000	1186100000
Q2FZM1	Q2FZM1_STAA8	SAOUHSC_00979	tr|Q2FZM1|Q2FZM1_STAA8 N-acetyltransferase domain-containing protein OS=Staphylococcus aureus (strain NCTC 8325 / PS 47) OX=93061 GN=SAOUHSC_00979 PE=4 SV=1	tr|Q2FZM1|Q2FZM1_STAA8	6	21.356	1.99229	0.00182064	0.000143597	400930000	291590000	306070000	260300000	394620000	37491000	45576000	114080000	149530000	126480000
Q2FWY3	Q2FWY3_STAA8	SAOUHSC_02138	tr|Q2FWY3|Q2FWY3_STAA8 Pectate_lyase_3 domain-containing protein OS=Staphylococcus aureus (strain NCTC 8325 / PS 47) OX=93061 GN=SAOUHSC_02138 PE=4 SV=1	tr|Q2FWY3|Q2FWY3_STAA8	12	40.719	1.97619	7.08688e-05	9.80693e-06	372250000	287720000	187970000	409740000	299360000	113880000	48979000	91579000	56326000	91026000
Q2G222	Y2979_STAA8	SAOUHSC_02979	sp|Q2G222|Y2979_STAA8 N-acetylmuramoyl-L-alanine amidase domain-containing protein SAOUHSC_02979 OS=Staphylococcus aureus (strain NCTC 8325 / PS 47) OX=93061 GN=SAOUHSC_02979 PE=1 SV=1	sp|Q2G222|Y2979_STAA8	12	69.252	1.97493	0.00795301	0.000530601	64596000	256020000	64332000	182800000	118990000	78534000	14095000	26329000	16150000	52372000
Q2G105	Q2G105_STAA8	SAOUHSC_00356	tr|Q2G105|Q2G105_STAA8 Uncharacterized protein OS=Staphylococcus aureus (strain NCTC 8325 / PS 47) OX=93061 GN=SAOUHSC_00356 PE=4 SV=1	tr|Q2G105|Q2G105_STAA8	24	21.306	1.95015	1.64347e-06	4.69746e-07	10525000000	16858000000	10356000000	15473000000	15748000000	3817100000	2808800000	4768500000	2559300000	3971900000
Q2FUY9	Q2FUY9_STAA8	SAOUHSC_02956	tr|Q2FUY9|Q2FUY9_STAA8 DNA-binding response regulator, putative OS=Staphylococcus aureus (strain NCTC 8325 / PS 47) OX=93061 GN=SAOUHSC_02956 PE=4 SV=1	tr|Q2FUY9|Q2FUY9_STAA8	7	25.392	1.93871	0.000708726	6.5127e-05	60513000	105510000	123170000	105710000	150700000	16408000	26225000	25557000	54894000	25062000
Q2G2T8	Q2G2T8_STAA8	SAOUHSC_00712	tr|Q2G2T8|Q2G2T8_STAA8 Aldo_ket_red domain-containing protein OS=Staphylococcus aureus (strain NCTC 8325 / PS 47) OX=93061 GN=SAOUHSC_00712 PE=4 SV=1	tr|Q2G2T8|Q2G2T8_STAA8	17	32.359	1.93509	3.94105e-07	1.56688e-07	1632900000	1819500000	1215400000	1660800000	1733200000	345990000	535030000	395110000	426850000	407150000
Q2G0W0	Q2G0W0_STAA8	SAOUHSC_00414	tr|Q2G0W0|Q2G0W0_STAA8 DUF2294 domain-containing protein OS=Staphylococcus aureus (strain NCTC 8325 / PS 47) OX=93061 GN=SAOUHSC_00414 PE=4 SV=1	tr|Q2G0W0|Q2G0W0_STAA8	6	13.581	1.91271	0.0014567	0.000118243	348690000	293630000	219900000	154950000	379940000	113260000	67516000	0	95596000	31998000
Q2G2G0	Q2G2G0_STAA8	SAOUHSC_00717	tr|Q2G2G0|Q2G2G0_STAA8 DM13 domain-containing protein OS=Staphylococcus aureus (strain NCTC 8325 / PS 47) OX=93061 GN=SAOUHSC_00717 PE=4 SV=1	tr|Q2G2G0|Q2G2G0_STAA8	16	16.045	1.90338	9.79912e-07	3.07904e-07	17759000000	20551000000	22076000000	23834000000	24579000000	5028400000	5420900000	5895600000	5603000000	7154900000
Q2FYK7	Q2FYK7_STAA8	SAOUHSC_01433	tr|Q2FYK7|Q2FYK7_STAA8 Uncharacterized protein OS=Staphylococcus aureus (strain NCTC 8325 / PS 47) OX=93061 GN=SAOUHSC_01433 PE=4 SV=1	tr|Q2FYK7|Q2FYK7_STAA8	12	30.644	1.8871	0.000152697	1.82499e-05	2209700000	3182900000	2102100000	2519100000	3250900000	719360000	1187600000	470280000	863130000	504250000
Q2FV41	Q2FV41_STAA8	SAOUHSC_02898	tr|Q2FV41|Q2FV41_STAA8 Uncharacterized protein OS=Staphylococcus aureus (strain NCTC 8325 / PS 47) OX=93061 GN=SAOUHSC_02898 PE=3 SV=1	tr|Q2FV41|Q2FV41_STAA8	10	24.931	1.88497	0.000626846	5.91511e-05	288850000	310830000	187850000	279130000	179530000	152710000	56809000	58023000	53077000	46026000
Q2FVE7	CNTA_STAA8	cntA	sp|Q2FVE7|CNTA_STAA8 Metal-staphylopine-binding protein CntA OS=Staphylococcus aureus (strain NCTC 8325 / PS 47) OX=93061 GN=cntA PE=1 SV=1	sp|Q2FVE7|CNTA_STAA8	27	60.076	1.88296	1.22836e-07	6.2974e-08	1299500000	1638600000	1170100000	1638400000	1800200000	395260000	473660000	460850000	324690000	384320000
Q2FVZ2	Q2FVZ2_STAA8	SAOUHSC_02529	tr|Q2FVZ2|Q2FVZ2_STAA8 Glyoxalase-like_dom domain-containing protein OS=Staphylococcus aureus (strain NCTC 8325 / PS 47) OX=93061 GN=SAOUHSC_02529 PE=4 SV=1	tr|Q2FVZ2|Q2FVZ2_STAA8	7	30.049	1.87963	0.000207895	2.36846e-05	126140000	102800000	0	157350000	209970000	21883000	0	52595000	30345000	53016000
Q2G1H0	Q2G1H0_STAA8	SAOUHSC_00153	tr|Q2G1H0|Q2G1H0_STAA8 Indolepyruvate decarboxylase, putative OS=Staphylococcus aureus (strain NCTC 8325 / PS 47) OX=93061 GN=SAOUHSC_00153 PE=3 SV=1	tr|Q2G1H0|Q2G1H0_STAA8	23	60.538	1.87081	6.12072e-06	1.27932e-06	12917000000	14450000000	8683300000	11863000000	11081000000	2981700000	3450200000	2352600000	4178200000	3219500000
Q2G2W0	Q2G2W0_STAA8	SAOUHSC_02005	tr|Q2G2W0|Q2G2W0_STAA8 Adenine DNA glycosylase OS=Staphylococcus aureus (strain NCTC 8325 / PS 47) OX=93061 GN=SAOUHSC_02005 PE=3 SV=1	tr|Q2G2W0|Q2G2W0_STAA8	4	40.623	1.8537	0.114794	0.00606057	0	137240000	178600000	0	0	3418100	106780000	28015000	157650000	114260000
Q2FZ07	Q2FZ07_STAA8	SAOUHSC_01264	tr|Q2FZ07|Q2FZ07_STAA8 Uncharacterized protein OS=Staphylococcus aureus (strain NCTC 8325 / PS 47) OX=93061 GN=SAOUHSC_01264 PE=4 SV=1	tr|Q2FZ07|Q2FZ07_STAA8	13	8.1612	1.84203	4.12813e-08	2.77315e-08	2998900000	3305200000	2638300000	3774000000	3840500000	808050000	969410000	877900000	909750000	1022900000
Q2G118	Q2G118_STAA8	SAOUHSC_00342	tr|Q2G118|Q2G118_STAA8 Chromosome partioning protein, ParB family, putative OS=Staphylococcus aureus (strain NCTC 8325 / PS 47) OX=93061 GN=SAOUHSC_00342 PE=3 SV=1	tr|Q2G118|Q2G118_STAA8	5	32.855	1.84039	5.23702e-06	1.13774e-06	0	41693000	0	66327000	31898000	0	11163000	12065000	0	10621000
Q2G223	Q2G223_STAA8	SAOUHSC_02976	tr|Q2G223|Q2G223_STAA8 Mannose-6-phosphate isomerase OS=Staphylococcus aureus (strain NCTC 8325 / PS 47) OX=93061 GN=SAOUHSC_02976 PE=3 SV=1	tr|Q2G223|Q2G223_STAA8	18	35.395	1.81559	5.27369e-09	6.04345e-09	3483300000	4523900000	3365400000	4090500000	3603100000	1116400000	1035600000	1182300000	1065100000	993420000
Q2FWW1	Q2FWW1_STAA8	SAOUHSC_02161	tr|Q2FWW1|Q2FWW1_STAA8 MHC class II analog protein OS=Staphylococcus aureus (strain NCTC 8325 / PS 47) OX=93061 GN=SAOUHSC_02161 PE=4 SV=1	tr|Q2FWW1|Q2FWW1_STAA8	7	65.573	1.80397	5.25611e-06	1.13774e-06	1631900000	1111100000	1156000000	1255100000	1619700000	377890000	383840000	455290000	333080000	373180000
Q2FYN6	Y1399_STAA8	SAOUHSC_01399	sp|Q2FYN6|Y1399_STAA8 Uncharacterized hydrolase SAOUHSC_01399 OS=Staphylococcus aureus (strain NCTC 8325 / PS 47) OX=93061 GN=SAOUHSC_01399 PE=3 SV=1	sp|Q2FYN6|Y1399_STAA8	8	43.143	1.79919	0.0231365	0.00139114	116390000	134630000	16852000	86964000	160390000	14729000	18974000	35578000	57124000	12701000
Q2FWX9	DIALD_STAA8	aldH1	sp|Q2FWX9|DIALD_STAA8 4,4-diaponeurosporen-aldehyde dehydrogenase OS=Staphylococcus aureus (strain NCTC 8325 / PS 47) OX=93061 GN=aldH1 PE=1 SV=1	sp|Q2FWX9|DIALD_STAA8	17	51.741	1.79018	8.10131e-06	1.62706e-06	490270000	750530000	358920000	786740000	602230000	211490000	138960000	220380000	128200000	152290000
Q2G000	Q2G000_STAA8	SAOUHSC_00834	tr|Q2G000|Q2G000_STAA8 Thioredoxin, putative OS=Staphylococcus aureus (strain NCTC 8325 / PS 47) OX=93061 GN=SAOUHSC_00834 PE=1 SV=1	tr|Q2G000|Q2G000_STAA8	5	12.141	1.78617	0.000249748	2.75406e-05	10144000000	14444000000	8274400000	10401000000	11195000000	1805500000	4276300000	5044900000	3429400000	2165400000
Q2G0A3	Q2G0A3_STAA8	SAOUHSC_00702	tr|Q2G0A3|Q2G0A3_STAA8 PPC domain-containing protein OS=Staphylococcus aureus (strain NCTC 8325 / PS 47) OX=93061 GN=SAOUHSC_00702 PE=4 SV=1	tr|Q2G0A3|Q2G0A3_STAA8	2	15.452	1.78186	4.50951e-05	6.55608e-06	523980000	697080000	516090000	773410000	849400000	173360000	0	334630000	193600000	126580000
Q7X2S2	ARCC2_STAA8	arcC2	sp|Q7X2S2|ARCC2_STAA8 Carbamate kinase 2 OS=Staphylococcus aureus (strain NCTC 8325 / PS 47) OX=93061 GN=arcC2 PE=3 SV=1	sp|Q7X2S2|ARCC2_STAA8	18	34.329	1.78186	1.8927e-05	3.12477e-06	7957400000	10246000000	5470600000	8584700000	8991900000	1538700000	3136200000	3021200000	2050400000	2395500000
Q2FUR8	Q2FUR8_STAA8	SAOUHSC_03034	tr|Q2FUR8|Q2FUR8_STAA8 Uncharacterized protein OS=Staphylococcus aureus (strain NCTC 8325 / PS 47) OX=93061 GN=SAOUHSC_03034 PE=3 SV=1	tr|Q2FUR8|Q2FUR8_STAA8	8	30.438	1.76553	0.0147691	0.000919239	342860000	495300000	390900000	391390000	410430000	37667000	143340000	281720000	60111000	256690000
Q2FV40	Q2FV40_STAA8	SAOUHSC_02899	tr|Q2FV40|Q2FV40_STAA8 Amidohydro-rel domain-containing protein OS=Staphylococcus aureus (strain NCTC 8325 / PS 47) OX=93061 GN=SAOUHSC_02899 PE=4 SV=1	tr|Q2FV40|Q2FV40_STAA8	14	38.194	1.75572	0.000114631	1.45959e-05	535450000	641200000	444130000	609460000	444900000	166070000	150640000	140840000	99639000	268180000
Q2G1Z0	Q2G1Z0_STAA8	SAOUHSC_00655	tr|Q2G1Z0|Q2G1Z0_STAA8 DhaK domain-containing protein OS=Staphylococcus aureus (strain NCTC 8325 / PS 47) OX=93061 GN=SAOUHSC_00655 PE=4 SV=1	tr|Q2G1Z0|Q2G1Z0_STAA8	16	35.018	1.73126	2.82175e-05	4.29724e-06	7739200000	7222400000	8000900000	6154400000	8862300000	2420100000	2728100000	1805300000	2342100000	2165700000
Q2G261	SODM2_STAA8	sodM	sp|Q2G261|SODM2_STAA8 Superoxide dismutase [Mn/Fe] 2 OS=Staphylococcus aureus (strain NCTC 8325 / PS 47) OX=93061 GN=sodM PE=1 SV=1	sp|Q2G261|SODM2_STAA8	17	23.041	1.67952	1.11992e-05	2.11822e-06	13609000000	17100000000	13179000000	14412000000	10292000000	4668800000	3922400000	3917400000	3630600000	5179300000
Q2G1K9	Q2G1K9_STAA8	SAOUHSC_00113	tr|Q2G1K9|Q2G1K9_STAA8 Aldehyde-alcohol dehydrogenase OS=Staphylococcus aureus (strain NCTC 8325 / PS 47) OX=93061 GN=SAOUHSC_00113 PE=3 SV=1	tr|Q2G1K9|Q2G1K9_STAA8	57	94.944	1.67012	4.62274e-10	1.00064e-09	30961000000	41070000000	26145000000	34922000000	32471000000	10061000000	9552200000	11148000000	9948800000	10835000000
Q2G050	Q2G050_STAA8	SAOUHSC_00776	tr|Q2G050|Q2G050_STAA8 Excinuclease ABC, B subunit OS=Staphylococcus aureus (strain NCTC 8325 / PS 47) OX=93061 GN=SAOUHSC_00776 PE=4 SV=1	tr|Q2G050|Q2G050_STAA8	25	39.816	1.66583	0.000254266	2.78283e-05	1712900000	1408400000	1384400000	2032700000	1869800000	515840000	507100000	330650000	514930000	886200000
Q2G0L3	Q2G0L3_STAA8	SAOUHSC_00547	tr|Q2G0L3|Q2G0L3_STAA8 Glycos_transf_1 domain-containing protein OS=Staphylococcus aureus (strain NCTC 8325 / PS 47) OX=93061 GN=SAOUHSC_00547 PE=4 SV=1	tr|Q2G0L3|Q2G0L3_STAA8	6	57.192	1.6027	0.000649284	6.05212e-05	58430000	0	16218000	29123000	0	11364000	0	0	0	13657000
Q2FZZ3	Q2FZZ3_STAA8	SAOUHSC_00841	tr|Q2FZZ3|Q2FZZ3_STAA8 Thioredoxin domain-containing protein OS=Staphylococcus aureus (strain NCTC 8325 / PS 47) OX=93061 GN=SAOUHSC_00841 PE=4 SV=1	tr|Q2FZZ3|Q2FZZ3_STAA8	2	11.454	1.59202	0.0113761	0.000721892	142190000	171460000	68114000	133360000	89841000	30321000	15636000	120910000	40654000	34285000
Q2G0D8	Q2G0D8_STAA8	SAOUHSC_00667	tr|Q2G0D8|Q2G0D8_STAA8 Putative hemin import ATP-binding protein HrtA OS=Staphylococcus aureus (strain NCTC 8325 / PS 47) OX=93061 GN=SAOUHSC_00667 PE=3 SV=1	tr|Q2G0D8|Q2G0D8_STAA8	4	28.463	1.58766	0.013321	0.000834524	58826000	166450000	16104000	142770000	64827000	0	0	22109000	23260000	0
Q2FV10	Q2FV10_STAA8	SAOUHSC_02933	tr|Q2FV10|Q2FV10_STAA8 Betaine aldehyde dehydrogenase OS=Staphylococcus aureus (strain NCTC 8325 / PS 47) OX=93061 GN=SAOUHSC_02933 PE=3 SV=1	tr|Q2FV10|Q2FV10_STAA8	19	54.622	1.58688	0.00678712	0.000457516	232570000	883550000	294580000	579240000	384080000	233970000	56004000	198660000	173070000	122200000
Q2FVN4	Q2FVN4_STAA8	SAOUHSC_02668	tr|Q2FVN4|Q2FVN4_STAA8 Uncharacterized protein OS=Staphylococcus aureus (strain NCTC 8325 / PS 47) OX=93061 GN=SAOUHSC_02668 PE=4 SV=1	tr|Q2FVN4|Q2FVN4_STAA8	7	14.007	1.57398	0.00891449	0.0005887	265240000	362700000	198990000	285910000	215760000	157160000	33485000	93749000	55861000	183180000
Q2FXP4	Q2FXP4_STAA8	SAOUHSC_01792	tr|Q2FXP4|Q2FXP4_STAA8 DnaB_2 domain-containing protein OS=Staphylococcus aureus (strain NCTC 8325 / PS 47) OX=93061 GN=SAOUHSC_01792 PE=4 SV=1	tr|Q2FXP4|Q2FXP4_STAA8	5	54.532	1.56265	0.0133223	0.000834524	18848000	71149000	50865000	96411000	179840000	22110000	19306000	21265000	0	27301000
Q2FV20	Q2FV20_STAA8	SAOUHSC_02920	tr|Q2FV20|Q2FV20_STAA8 2-dehydropantoate 2-reductase OS=Staphylococcus aureus (strain NCTC 8325 / PS 47) OX=93061 GN=SAOUHSC_02920 PE=3 SV=1	tr|Q2FV20|Q2FV20_STAA8	6	32.357	1.53757	0.00114458	9.6528e-05	186450000	97254000	146720000	152370000	199790000	38919000	82800000	0	50885000	42175000
Q2FV27	Q2FV27_STAA8	SAOUHSC_02912	tr|Q2FV27|Q2FV27_STAA8 3-dmu-9_3-mt domain-containing protein OS=Staphylococcus aureus (strain NCTC 8325 / PS 47) OX=93061 GN=SAOUHSC_02912 PE=4 SV=1	tr|Q2FV27|Q2FV27_STAA8	8	16.939	1.53203	0.00566496	0.00039556	1109400000	1552900000	509120000	994580000	460730000	208420000	342460000	492720000	342820000	164810000
Q2G1A6	Q2G1A6_STAA8	rbsK	tr|Q2G1A6|Q2G1A6_STAA8 Ribokinase OS=Staphylococcus aureus (strain NCTC 8325 / PS 47) OX=93061 GN=rbsK PE=3 SV=1	tr|Q2G1A6|Q2G1A6_STAA8	13	32.448	1.53121	7.17588e-07	2.45256e-07	2052200000	2375700000	1954100000	2332700000	2502700000	652640000	668700000	1024500000	839660000	734530000
Q2FYK0	Q2FYK0_STAA8	SAOUHSC_01440	tr|Q2FYK0|Q2FYK0_STAA8 Probable queuosine precursor transporter OS=Staphylococcus aureus (strain NCTC 8325 / PS 47) OX=93061 GN=SAOUHSC_01440 PE=3 SV=1	tr|Q2FYK0|Q2FYK0_STAA8	2	26.031	1.5245	0.000518484	5.05038e-05	0	0	0	63941000	22489000	11146000	0	10735000	11313000	0
Q2FV02	Q2FV02_STAA8	SAOUHSC_02942	tr|Q2FV02|Q2FV02_STAA8 Anaerobic ribonucleoside-triphosphate reductase, putative OS=Staphylococcus aureus (strain NCTC 8325 / PS 47) OX=93061 GN=SAOUHSC_02942 PE=4 SV=1	tr|Q2FV02|Q2FV02_STAA8	16	70.479	1.52287	0.0281947	0.00167973	83966000	57857000	89182000	104130000	117430000	55819000	12644000	29803000	14739000	87207000
Q2FZE0	Q2FZE0_STAA8	SAOUHSC_01091	tr|Q2FZE0|Q2FZE0_STAA8 SpoU_sub_bind domain-containing protein OS=Staphylococcus aureus (strain NCTC 8325 / PS 47) OX=93061 GN=SAOUHSC_01091 PE=4 SV=1	tr|Q2FZE0|Q2FZE0_STAA8	9	26.913	1.51626	0.00217875	0.000167767	742060000	887110000	566710000	874800000	991320000	298170000	370530000	350980000	110910000	392790000
Q2FY61	Q2FY61_STAA8	SAOUHSC_01604	tr|Q2FY61|Q2FY61_STAA8 VOC domain-containing protein OS=Staphylococcus aureus (strain NCTC 8325 / PS 47) OX=93061 GN=SAOUHSC_01604 PE=4 SV=1	tr|Q2FY61|Q2FY61_STAA8	7	13.89	1.48656	0.00073523	6.66199e-05	1051100000	886940000	715480000	786290000	830000000	539480000	227980000	227420000	370330000	243230000
Q2G0E9	Q2G0E9_STAA8	SAOUHSC_00656	tr|Q2G0E9|Q2G0E9_STAA8 DhaL domain-containing protein OS=Staphylococcus aureus (strain NCTC 8325 / PS 47) OX=93061 GN=SAOUHSC_00656 PE=4 SV=1	tr|Q2G0E9|Q2G0E9_STAA8	22	21.261	1.48239	6.35528e-08	3.7518e-08	9600400000	11021000000	7391000000	10127000000	10275000000	3810900000	3078700000	3938900000	3561400000	2903100000
Q2FYH9	Q2FYH9_STAA8	SAOUHSC_01468	tr|Q2FYH9|Q2FYH9_STAA8 Uncharacterized protein OS=Staphylococcus aureus (strain NCTC 8325 / PS 47) OX=93061 GN=SAOUHSC_01468 PE=4 SV=1	tr|Q2FYH9|Q2FYH9_STAA8	5	13.672	1.4795	4.01131e-05	5.96533e-06	353470000	373910000	255110000	361120000	234030000	98675000	115710000	108790000	143800000	94618000
Q2G217	Q2G217_STAA8	SAOUHSC_00211	tr|Q2G217|Q2G217_STAA8 IU_nuc_hydro domain-containing protein OS=Staphylococcus aureus (strain NCTC 8325 / PS 47) OX=93061 GN=SAOUHSC_00211 PE=4 SV=1	tr|Q2G217|Q2G217_STAA8	4	33.794	1.47866	0.00100463	8.62184e-05	290160000	545280000	211430000	476600000	460100000	74463000	148440000	235080000	132370000	126860000
Q2G002	AROD_STAA8	aroD	sp|Q2G002|AROD_STAA8 3-dehydroquinate dehydratase OS=Staphylococcus aureus (strain NCTC 8325 / PS 47) OX=93061 GN=aroD PE=1 SV=1	sp|Q2G002|AROD_STAA8	5	26.869	1.4727	9.95959e-06	1.94026e-06	135500000	202920000	93941000	144950000	156000000	41385000	0	0	69045000	0
Q2G0G3	Q2G0G3_STAA8	SAOUHSC_00606	tr|Q2G0G3|Q2G0G3_STAA8 HD domain-containing protein OS=Staphylococcus aureus (strain NCTC 8325 / PS 47) OX=93061 GN=SAOUHSC_00606 PE=4 SV=1	tr|Q2G0G3|Q2G0G3_STAA8	16	50.595	1.45935	0.00052699	5.1077e-05	198580000	248270000	353880000	442390000	320600000	116490000	0	129390000	130650000	76668000
Q2FY51	Q2FY51_STAA8	SAOUHSC_01614	tr|Q2FY51|Q2FY51_STAA8 Dihydrolipoyl dehydrogenase OS=Staphylococcus aureus (strain NCTC 8325 / PS 47) OX=93061 GN=SAOUHSC_01614 PE=3 SV=1	tr|Q2FY51|Q2FY51_STAA8	19	51.111	1.42037	0.100219	0.00534907	821660000	895960000	496550000	679100000	711140000	705710000	71126000	725840000	490010000	71988000
Q2G1G7	Q2G1G7_STAA8	SAOUHSC_00156	tr|Q2G1G7|Q2G1G7_STAA8 Uncharacterized protein OS=Staphylococcus aureus (strain NCTC 8325 / PS 47) OX=93061 GN=SAOUHSC_00156 PE=4 SV=1	tr|Q2G1G7|Q2G1G7_STAA8	6	39.868	1.41762	0.00920487	0.000601757	78471000	70963000	97652000	83602000	275410000	41897000	27970000	29105000	58906000	45802000
Q2FVQ2	Y2650_STAA8	SAOUHSC_02650	sp|Q2FVQ2|Y2650_STAA8 Uncharacterized lipoprotein SAOUHSC_02650 OS=Staphylococcus aureus (strain NCTC 8325 / PS 47) OX=93061 GN=SAOUHSC_02650 PE=3 SV=1	sp|Q2FVQ2|Y2650_STAA8	9	23.362	1.41328	0.000232844	2.5991e-05	2706000000	4497600000	2485700000	3016200000	3235100000	1001000000	1018200000	1605400000	771950000	1743700000
Q2FY46	EX7L_STAA8	xseA	sp|Q2FY46|EX7L_STAA8 Exodeoxyribonuclease 7 large subunit OS=Staphylococcus aureus (strain NCTC 8325 / PS 47) OX=93061 GN=xseA PE=3 SV=1	sp|Q2FY46|EX7L_STAA8	20	50.894	1.40759	2.44539e-05	3.90487e-06	336600000	471580000	370440000	298690000	457910000	117220000	138830000	156740000	170090000	141060000
Q2G1U2	Q2G1U2_STAA8	SAOUHSC_01174	tr|Q2G1U2|Q2G1U2_STAA8 3-dmu-9_3-mt domain-containing protein OS=Staphylococcus aureus (strain NCTC 8325 / PS 47) OX=93061 GN=SAOUHSC_01174 PE=4 SV=1	tr|Q2G1U2|Q2G1U2_STAA8	7	14.859	1.40532	0.000285259	3.0703e-05	400660000	613520000	461010000	303790000	464750000	174950000	146280000	177480000	123310000	219100000
Q2FZE9	ISDA_STAA8	isdA	sp|Q2FZE9|ISDA_STAA8 Iron-regulated surface determinant protein A OS=Staphylococcus aureus (strain NCTC 8325 / PS 47) OX=93061 GN=isdA PE=1 SV=1	sp|Q2FZE9|ISDA_STAA8	7	38.745	1.39682	0.000721551	6.57938e-05	456110000	719070000	432840000	328860000	453070000	166220000	165720000	126490000	179260000	267500000
Q2FV14	Q2FV14_STAA8	SAOUHSC_02929	tr|Q2FV14|Q2FV14_STAA8 Acyl-CoA synthetase OS=Staphylococcus aureus (strain NCTC 8325 / PS 47) OX=93061 GN=SAOUHSC_02929 PE=4 SV=1	tr|Q2FV14|Q2FV14_STAA8	35	59.748	1.38109	2.28982e-07	1.0661e-07	5567900000	6212000000	4849000000	5901900000	7029300000	2436700000	1889900000	2317100000	2128000000	2556100000
Q2FUX7	ARCA_STAA8	arcA	sp|Q2FUX7|ARCA_STAA8 Arginine deiminase OS=Staphylococcus aureus (strain NCTC 8325 / PS 47) OX=93061 GN=arcA PE=3 SV=1	sp|Q2FUX7|ARCA_STAA8	43	46.914	1.37996	4.244e-06	9.96131e-07	30172000000	33258000000	21352000000	30981000000	23762000000	12316000000	10790000000	11541000000	9013800000	9555000000
Q2FVN3	SARZ_STAA8	sarZ	sp|Q2FVN3|SARZ_STAA8 HTH-type transcriptional regulator SarZ OS=Staphylococcus aureus (strain NCTC 8325 / PS 47) OX=93061 GN=sarZ PE=1 SV=1	sp|Q2FVN3|SARZ_STAA8	9	17.435	1.35463	3.12909e-05	4.7255e-06	753890000	1015200000	644980000	1021200000	1103500000	349180000	330980000	328310000	265620000	504630000
Q2G047	Q2G047_STAA8	SAOUHSC_00779	tr|Q2G047|Q2G047_STAA8 Excinuclease ABC subunit B, putative OS=Staphylococcus aureus (strain NCTC 8325 / PS 47) OX=93061 GN=SAOUHSC_00779 PE=3 SV=1	tr|Q2G047|Q2G047_STAA8	23	37.477	1.3501	0.000533255	5.14284e-05	1306100000	1834500000	1147200000	1676800000	1577800000	317530000	788740000	618820000	743140000	586430000
Q2FXV1	Y1730_STAA8	SAOUHSC_01730	sp|Q2FXV1|Y1730_STAA8 UPF0337 protein SAOUHSC_01730 OS=Staphylococcus aureus (strain NCTC 8325 / PS 47) OX=93061 GN=SAOUHSC_01730 PE=3 SV=1	sp|Q2FXV1|Y1730_STAA8	10	6.6824	1.33723	0.000669804	6.21366e-05	16315000000	20028000000	11217000000	19077000000	12589000000	6039900000	3651100000	10194000000	5196200000	7317900000
Q2FZZ9	Q2FZZ9_STAA8	SAOUHSC_00835	tr|Q2FZZ9|Q2FZZ9_STAA8 Uncharacterized protein OS=Staphylococcus aureus (strain NCTC 8325 / PS 47) OX=93061 GN=SAOUHSC_00835 PE=3 SV=1	tr|Q2FZZ9|Q2FZZ9_STAA8	14	13.6	1.32961	1.17283e-08	1.08801e-08	17509000000	23514000000	15878000000	21426000000	20089000000	6753800000	7634700000	8429600000	7973800000	8094900000
Q2G289	Q2G289_STAA8	SAOUHSC_00088	tr|Q2G289|Q2G289_STAA8 Epimerase domain-containing protein OS=Staphylococcus aureus (strain NCTC 8325 / PS 47) OX=93061 GN=SAOUHSC_00088 PE=4 SV=1	tr|Q2G289|Q2G289_STAA8	4	37.284	1.32482	5.9722e-07	2.11539e-07	22557000	27250000	22296000	23876000	0	8440200	0	0	10096000	0
Q2FWI3	Q2FWI3_STAA8	SAOUHSC_02308	tr|Q2FWI3|Q2FWI3_STAA8 Uncharacterized protein OS=Staphylococcus aureus (strain NCTC 8325 / PS 47) OX=93061 GN=SAOUHSC_02308 PE=4 SV=1	tr|Q2FWI3|Q2FWI3_STAA8	5	60.745	1.32298	0.00517522	0.000369305	0	78884000	49853000	88552000	184810000	0	0	25724000	58891000	0
Q2FUX8	Q2FUX8_STAA8	argF	tr|Q2FUX8|Q2FUX8_STAA8 Ornithine carbamoyltransferase OS=Staphylococcus aureus (strain NCTC 8325 / PS 47) OX=93061 GN=argF PE=3 SV=1	tr|Q2FUX8|Q2FUX8_STAA8	20	37.762	1.31748	9.32265e-07	3.07465e-07	21930000000	29211000000	23687000000	26792000000	30394000000	12307000000	10443000000	9976000000	9524600000	10522000000
Q2G0D9	GRAS_STAA8	graS	sp|Q2G0D9|GRAS_STAA8 Sensor histidine kinase GraS OS=Staphylococcus aureus (strain NCTC 8325 / PS 47) OX=93061 GN=graS PE=1 SV=1	sp|Q2G0D9|GRAS_STAA8	2	41.078	1.31266	0.000420531	4.22295e-05	30519000	0	31340000	0	0	10760000	11290000	0	19522000	23004000
Q2G1B8	TARL_STAA8	tarL	sp|Q2G1B8|TARL_STAA8 Teichoic acid ribitol-phosphate polymerase TarL OS=Staphylococcus aureus (strain NCTC 8325 / PS 47) OX=93061 GN=tarL PE=1 SV=1	sp|Q2G1B8|TARL_STAA8	27	66.074	1.31158	7.09795e-05	9.80693e-06	2044500000	1778300000	1403800000	2047400000	2842300000	824910000	573520000	827200000	806920000	998260000
Q2G0Z4	Q2G0Z4_STAA8	SAOUHSC_00367	tr|Q2G0Z4|Q2G0Z4_STAA8 Uncharacterized protein OS=Staphylococcus aureus (strain NCTC 8325 / PS 47) OX=93061 GN=SAOUHSC_00367 PE=3 SV=1	tr|Q2G0Z4|Q2G0Z4_STAA8	2	49.412	1.30489	5.89199e-05	8.44e-06	0	29209000	0	25847000	19575000	0	0	0	0	7303400
Q2FVB2	F16PC_STAA8	fbp	sp|Q2FVB2|F16PC_STAA8 Fructose-1,6-bisphosphatase class 3 OS=Staphylococcus aureus (strain NCTC 8325 / PS 47) OX=93061 GN=fbp PE=3 SV=1	sp|Q2FVB2|F16PC_STAA8	30	76.174	1.30092	0.000169762	2.00436e-05	2461600000	2825900000	2865400000	3156800000	4803000000	1661900000	996810000	1312100000	1101000000	1390800000
Q2FW72	SFNAB_STAA8	sfnaB	sp|Q2FW72|SFNAB_STAA8 Staphyloferrin A synthase OS=Staphylococcus aureus (strain NCTC 8325 / PS 47) OX=93061 GN=sfnaB PE=1 SV=1	sp|Q2FW72|SFNAB_STAA8	3	67.211	1.29486	0.0194476	0.00118396	80638000	23224000	0	26485000	45435000	12763000	0	0	10200000	27940000
Q2FW75	Q2FW75_STAA8	SAOUHSC_02430	tr|Q2FW75|Q2FW75_STAA8 ABC transporter periplasmic binding protein, putative OS=Staphylococcus aureus (strain NCTC 8325 / PS 47) OX=93061 GN=SAOUHSC_02430 PE=4 SV=1	tr|Q2FW75|Q2FW75_STAA8	21	36.591	1.27434	0.000390642	4.00539e-05	3357800000	2315700000	3280900000	3081000000	2655100000	1168300000	1005100000	1382000000	1036600000	1498100000
Q2FXA7	Q2FXA7_STAA8	SAOUHSC_01958	tr|Q2FXA7|Q2FXA7_STAA8 Uncharacterized protein OS=Staphylococcus aureus (strain NCTC 8325 / PS 47) OX=93061 GN=SAOUHSC_01958 PE=4 SV=1	tr|Q2FXA7|Q2FXA7_STAA8	8	21.442	1.26936	0.0375462	0.00217047	161960000	642620000	230380000	119410000	438750000	126340000	197540000	0	75975000	66744000
Q2FYG4	Q2FYG4_STAA8	SAOUHSC_01488	tr|Q2FYG4|Q2FYG4_STAA8 Uncharacterized protein OS=Staphylococcus aureus (strain NCTC 8325 / PS 47) OX=93061 GN=SAOUHSC_01488 PE=1 SV=1	tr|Q2FYG4|Q2FYG4_STAA8	6	22.184	1.26769	0.00126631	0.00010409	364100000	277160000	335800000	549130000	464790000	123890000	178240000	145010000	135200000	246880000
Q2G280	Q2G280_STAA8	SAOUHSC_01999	tr|Q2G280|Q2G280_STAA8 NADH-dependent peroxiredoxin OS=Staphylococcus aureus (strain NCTC 8325 / PS 47) OX=93061 GN=SAOUHSC_01999 PE=4 SV=1	tr|Q2G280|Q2G280_STAA8	16	17.26	1.25764	2.58248e-06	6.69359e-07	8200000000	8881100000	6584000000	8232300000	6698000000	2965300000	3402200000	3333500000	3333600000	3017600000
Q2G163	Q2G163_STAA8	psuG	tr|Q2G163|Q2G163_STAA8 Pseudouridine-5-phosphate glycosidase OS=Staphylococcus aureus (strain NCTC 8325 / PS 47) OX=93061 GN=psuG PE=3 SV=1	tr|Q2G163|Q2G163_STAA8	7	32.866	1.25737	0.00209782	0.000162822	121830000	143460000	92754000	100360000	129780000	47043000	56723000	93162000	34418000	31607000
Q2G293	Q2G293_STAA8	SAOUHSC_01847	tr|Q2G293|Q2G293_STAA8 N-acetyltransferase domain-containing protein OS=Staphylococcus aureus (strain NCTC 8325 / PS 47) OX=93061 GN=SAOUHSC_01847 PE=4 SV=1	tr|Q2G293|Q2G293_STAA8	4	24.776	1.2453	0.035672	0.00206827	0	33783000	80706000	38602000	80535000	47731000	14029000	0	12123000	0
Q2G242	Q2G242_STAA8	SAOUHSC_00508	tr|Q2G242|Q2G242_STAA8 TRAM domain-containing protein OS=Staphylococcus aureus (strain NCTC 8325 / PS 47) OX=93061 GN=SAOUHSC_00508 PE=3 SV=1	tr|Q2G242|Q2G242_STAA8	5	38.887	1.24153	0.0391238	0.00224172	68435000	88780000	80918000	63053000	311840000	38825000	20250000	84680000	0	47085000
Q2FWB9	Q2FWB9_STAA8	deoC	tr|Q2FWB9|Q2FWB9_STAA8 Deoxyribose-phosphate aldolase OS=Staphylococcus aureus (strain NCTC 8325 / PS 47) OX=93061 GN=deoC PE=3 SV=1	tr|Q2FWB9|Q2FWB9_STAA8	14	23.327	1.22976	0.00671474	0.000455792	2525700000	4724400000	2599300000	5030800000	2050800000	1639400000	917760000	2278800000	1578000000	833570000
Q2G0Z1	Q2G0Z1_STAA8	SAOUHSC_00370	tr|Q2G0Z1|Q2G0Z1_STAA8 Uncharacterized protein OS=Staphylococcus aureus (strain NCTC 8325 / PS 47) OX=93061 GN=SAOUHSC_00370 PE=4 SV=1	tr|Q2G0Z1|Q2G0Z1_STAA8	8	25.804	1.22328	0.0116867	0.000739198	473210000	375040000	202130000	267680000	524400000	151920000	127890000	119690000	96123000	324700000
Q2G2U1	SAES_STAA8	saeS	sp|Q2G2U1|SAES_STAA8 Histidine protein kinase SaeS OS=Staphylococcus aureus (strain NCTC 8325 / PS 47) OX=93061 GN=saeS PE=1 SV=1	sp|Q2G2U1|SAES_STAA8	10	39.741	1.22065	0.000310822	3.30888e-05	1093400000	1042400000	1187400000	1166300000	1737300000	522150000	356090000	671080000	543350000	588330000
Q2G023	SSRP_STAA8	smpB	sp|Q2G023|SSRP_STAA8 SsrA-binding protein OS=Staphylococcus aureus (strain NCTC 8325 / PS 47) OX=93061 GN=smpB PE=3 SV=1	sp|Q2G023|SSRP_STAA8	4	17.755	1.20673	0.010056	0.000646549	0	0	25404000	116500000	129980000	28894000	28055000	29228000	41403000	0
Q2FXF8	Q2FXF8_STAA8	SAOUHSC_01890	tr|Q2FXF8|Q2FXF8_STAA8 NAD_binding_9 domain-containing protein OS=Staphylococcus aureus (strain NCTC 8325 / PS 47) OX=93061 GN=SAOUHSC_01890 PE=4 SV=1	tr|Q2FXF8|Q2FXF8_STAA8	10	57.577	1.20125	5.59385e-07	2.01807e-07	173500000	249660000	163080000	230300000	220810000	102880000	83271000	97117000	91022000	73796000
Q2FV66	Q2FV66_STAA8	SAOUHSC_02871	tr|Q2FV66|Q2FV66_STAA8 Acetyltransferase OS=Staphylococcus aureus (strain NCTC 8325 / PS 47) OX=93061 GN=SAOUHSC_02871 PE=3 SV=1	tr|Q2FV66|Q2FV66_STAA8	3	22.119	1.18228	0.0294296	0.00174795	302790000	379340000	212770000	324920000	316560000	261240000	72943000	237710000	170510000	54073000
Q2FYV6	Q2FYV6_STAA8	SAOUHSC_01318	tr|Q2FYV6|Q2FYV6_STAA8 Uncharacterized protein OS=Staphylococcus aureus (strain NCTC 8325 / PS 47) OX=93061 GN=SAOUHSC_01318 PE=4 SV=1	tr|Q2FYV6|Q2FYV6_STAA8	6	22.751	1.16573	0.00521082	0.000370488	136720000	162820000	69979000	150360000	167270000	121220000	38363000	58514000	51257000	49426000
Q2FX91	Q2FX91_STAA8	SAOUHSC_01986	tr|Q2FX91|Q2FX91_STAA8 Uncharacterized protein OS=Staphylococcus aureus (strain NCTC 8325 / PS 47) OX=93061 GN=SAOUHSC_01986 PE=4 SV=1	tr|Q2FX91|Q2FX91_STAA8	3	5.9362	1.16231	0.0871167	0.00468826	94203000	238110000	72150000	33458000	75173000	24648000	20653000	27489000	63413000	81676000
Q2G0S7	Q2G0S7_STAA8	SAOUHSC_00467	tr|Q2G0S7|Q2G0S7_STAA8 Pur operon repressor OS=Staphylococcus aureus (strain NCTC 8325 / PS 47) OX=93061 GN=SAOUHSC_00467 PE=3 SV=1	tr|Q2G0S7|Q2G0S7_STAA8	20	30.395	1.15481	0.000122831	1.54382e-05	1806400000	1901700000	933880000	1472300000	1521500000	594420000	670440000	712560000	539980000	856460000
Q2G0T3	RECR_STAA8	recR	sp|Q2G0T3|RECR_STAA8 Recombination protein RecR OS=Staphylococcus aureus (strain NCTC 8325 / PS 47) OX=93061 GN=recR PE=3 SV=1	sp|Q2G0T3|RECR_STAA8	8	22.099	1.13584	0.077425	0.00418984	152450000	178270000	59809000	216480000	187580000	52328000	107410000	132180000	93491000	18546000
Q2FY72	Q2FY72_STAA8	SAOUHSC_01593	tr|Q2FY72|Q2FY72_STAA8 NUDIX domain protein OS=Staphylococcus aureus (strain NCTC 8325 / PS 47) OX=93061 GN=SAOUHSC_01593 PE=4 SV=1	tr|Q2FY72|Q2FY72_STAA8	9	20.439	1.13371	0.00576764	0.000399514	1032200000	1214200000	849310000	1099300000	898870000	223020000	669770000	495390000	638880000	437420000
Q2FVM6	NREB_STAA8	nreB	sp|Q2FVM6|NREB_STAA8 Oxygen sensor histidine kinase NreB OS=Staphylococcus aureus (strain NCTC 8325 / PS 47) OX=93061 GN=nreB PE=3 SV=1	sp|Q2FVM6|NREB_STAA8	12	39.12	1.12212	0.0012485	0.00010409	303460000	370370000	214620000	301430000	297250000	196980000	127270000	108270000	89677000	181730000
Q2FVR7	Q2FVR7_STAA8	SAOUHSC_02625	tr|Q2FVR7|Q2FVR7_STAA8 Uncharacterized protein OS=Staphylococcus aureus (strain NCTC 8325 / PS 47) OX=93061 GN=SAOUHSC_02625 PE=4 SV=1	tr|Q2FVR7|Q2FVR7_STAA8	3	19.024	1.12036	0.0109501	0.000697135	64125000	84590000	57029000	69925000	60848000	41796000	11839000	0	41477000	39338000
Q2FXU1	Q2FXU1_STAA8	SAOUHSC_01742	tr|Q2FXU1|Q2FXU1_STAA8 (p)ppGpp synthase OS=Staphylococcus aureus (strain NCTC 8325 / PS 47) OX=93061 GN=SAOUHSC_01742 PE=3 SV=1	tr|Q2FXU1|Q2FXU1_STAA8	21	83.693	1.09933	0.00439129	0.000320406	486830000	276950000	336270000	424130000	643640000	182630000	239900000	139550000	207070000	216520000
P0A086	MSRA2_STAA8	msrA2	sp|P0A086|MSRA2_STAA8 Peptide methionine sulfoxide reductase MsrA 2 OS=Staphylococcus aureus (strain NCTC 8325 / PS 47) OX=93061 GN=msrA2 PE=1 SV=1	sp|P0A086|MSRA2_STAA8	7	20.588	1.09911	0.000195665	2.25551e-05	2894900000	2250100000	1717500000	2583200000	2420400000	928570000	1394400000	992610000	1120200000	1076900000
Q2FUS2	Q2FUS2_STAA8	SAOUHSC_03030	tr|Q2FUS2|Q2FUS2_STAA8 Na(+)/dicarboxylate symporter OS=Staphylococcus aureus (strain NCTC 8325 / PS 47) OX=93061 GN=SAOUHSC_03030 PE=3 SV=1	tr|Q2FUS2|Q2FUS2_STAA8	3	51.341	1.09621	0.00503811	0.000360843	0	64006000	28031000	26858000	74593000	0	0	0	0	17300000
Q2G0M7	HCHA_STAA8	hchA	sp|Q2G0M7|HCHA_STAA8 Protein/nucleic acid deglycase HchA OS=Staphylococcus aureus (strain NCTC 8325 / PS 47) OX=93061 GN=hchA PE=1 SV=1	sp|Q2G0M7|HCHA_STAA8	18	32.176	1.0938	1.13363e-05	2.12352e-06	9059100000	14167000000	9478100000	12123000000	12846000000	4485400000	4811200000	5169700000	6435600000	5956800000
Q2FVZ4	FEMX_STAA8	femX	sp|Q2FVZ4|FEMX_STAA8 Lipid II:glycine glycyltransferase OS=Staphylococcus aureus (strain NCTC 8325 / PS 47) OX=93061 GN=femX PE=1 SV=1	sp|Q2FVZ4|FEMX_STAA8	22	48.521	1.08268	0.000399859	4.05719e-05	1622800000	1518800000	1285200000	1568700000	1461400000	918240000	516600000	590380000	897550000	677870000
Q2FXL9	Y1816_STAA8	SAOUHSC_01816	sp|Q2FXL9|Y1816_STAA8 Uncharacterized peptidase SAOUHSC_01816 OS=Staphylococcus aureus (strain NCTC 8325 / PS 47) OX=93061 GN=SAOUHSC_01816 PE=3 SV=1	sp|Q2FXL9|Y1816_STAA8	14	39.553	1.05225	1.57259e-05	2.68738e-06	6657500000	9460600000	5125600000	6620400000	7040800000	2963600000	3784500000	3065700000	3323300000	3433700000
Q2FWE4	Y2355_STAA8	SAOUHSC_02355	sp|Q2FWE4|Y2355_STAA8 UPF0340 protein SAOUHSC_02355 OS=Staphylococcus aureus (strain NCTC 8325 / PS 47) OX=93061 GN=SAOUHSC_02355 PE=3 SV=1	sp|Q2FWE4|Y2355_STAA8	5	18.895	1.05052	0.00113573	9.63895e-05	237900000	339660000	268890000	379760000	415330000	103470000	167670000	196470000	207970000	126810000
Q2G2V9	Q2G2V9_STAA8	SAOUHSC_02006	tr|Q2G2V9|Q2G2V9_STAA8 Uncharacterized protein OS=Staphylococcus aureus (strain NCTC 8325 / PS 47) OX=93061 GN=SAOUHSC_02006 PE=4 SV=1	tr|Q2G2V9|Q2G2V9_STAA8	3	37.083	1.04422	0.0424461	0.00241786	12000000	0	0	21925000	70264000	0	0	0	0	14656000
Q2FV69	Q2FV69_STAA8	SAOUHSC_02867	tr|Q2FV69|Q2FV69_STAA8 HTH tetR-type domain-containing protein OS=Staphylococcus aureus (strain NCTC 8325 / PS 47) OX=93061 GN=SAOUHSC_02867 PE=4 SV=1	tr|Q2FV69|Q2FV69_STAA8	4	21.879	1.03717	0.0157767	0.000975718	58379000	0	174200000	143920000	141810000	66724000	37975000	58754000	84482000	0
Q2G0R3	Q2G0R3_STAA8	SAOUHSC_00483	tr|Q2G0R3|Q2G0R3_STAA8 S1 RNA binding domain protein OS=Staphylococcus aureus (strain NCTC 8325 / PS 47) OX=93061 GN=SAOUHSC_00483 PE=4 SV=1	tr|Q2G0R3|Q2G0R3_STAA8	9	14.812	1.02629	0.00264698	0.000201433	1704700000	1374600000	1613300000	1827100000	1786600000	1043600000	1134400000	664590000	709880000	630330000
Q2FXV7	Q2FXV7_STAA8	SAOUHSC_01724	tr|Q2FXV7|Q2FXV7_STAA8 Uncharacterized protein OS=Staphylococcus aureus (strain NCTC 8325 / PS 47) OX=93061 GN=SAOUHSC_01724 PE=4 SV=1	tr|Q2FXV7|Q2FXV7_STAA8	6	25.701	1.02072	0.112329	0.00596272	97419000	140240000	80818000	193390000	71719000	105390000	22953000	41704000	28948000	152520000
Q2G1T4	Q2G1T4_STAA8	SAOUHSC_00830	tr|Q2G1T4|Q2G1T4_STAA8 N-acetyltransferase domain-containing protein OS=Staphylococcus aureus (strain NCTC 8325 / PS 47) OX=93061 GN=SAOUHSC_00830 PE=4 SV=1	tr|Q2G1T4|Q2G1T4_STAA8	7	18.962	1.01647	0.00858843	0.000571038	236610000	335980000	137380000	120370000	281400000	134240000	86999000	81930000	116150000	98247000
Q2FVL7	Q2FVL7_STAA8	SAOUHSC_02694	tr|Q2FVL7|Q2FVL7_STAA8 Thioredoxin-like_fold domain-containing protein OS=Staphylococcus aureus (strain NCTC 8325 / PS 47) OX=93061 GN=SAOUHSC_02694 PE=4 SV=1	tr|Q2FVL7|Q2FVL7_STAA8	6	23.061	1.01636	0.0331963	0.00194207	175490000	217370000	172080000	106440000	215570000	76990000	37042000	156400000	126520000	78810000
Q2G2S6	PRSA_STAA8	prsA	sp|Q2G2S6|PRSA_STAA8 Foldase protein PrsA OS=Staphylococcus aureus (strain NCTC 8325 / PS 47) OX=93061 GN=prsA PE=3 SV=1	sp|Q2G2S6|PRSA_STAA8	43	35.637	1.01269	1.84923e-06	5.14649e-07	23778000000	33595000000	18067000000	33272000000	27587000000	13049000000	11657000000	14657000000	12147000000	14628000000
Q2FZ43	TRMD_STAA8	trmD	sp|Q2FZ43|TRMD_STAA8 tRNA (guanine-N(1)-)-methyltransferase OS=Staphylococcus aureus (strain NCTC 8325 / PS 47) OX=93061 GN=trmD PE=3 SV=1	sp|Q2FZ43|TRMD_STAA8	6	28.056	1.0109	0.00906056	0.000594316	591420000	629100000	670230000	599660000	710100000	150090000	361600000	401440000	382530000	383390000
Q2FZF9	Q2FZF9_STAA8	SAOUHSC_01071	tr|Q2FZF9|Q2FZF9_STAA8 Glycerophosphoryl diester phosphodiesterase, putative OS=Staphylococcus aureus (strain NCTC 8325 / PS 47) OX=93061 GN=SAOUHSC_01071 PE=4 SV=1	tr|Q2FZF9|Q2FZF9_STAA8	16	34.733	1.00362	0.00905827	0.000594316	298610000	349980000	374950000	297140000	218820000	172920000	115850000	113170000	142650000	243120000
Q2G0E0	GRAR_STAA8	graR	sp|Q2G0E0|GRAR_STAA8 Response regulator protein GraR OS=Staphylococcus aureus (strain NCTC 8325 / PS 47) OX=93061 GN=graR PE=1 SV=1	sp|Q2G0E0|GRAR_STAA8	11	26.079	1.0034	0.0389678	0.00223937	150080000	483370000	153300000	277120000	196370000	81221000	93965000	297220000	98513000	83640000
Q2FXG2	RISB_STAA8	ribH	sp|Q2FXG2|RISB_STAA8 6,7-dimethyl-8-ribityllumazine synthase OS=Staphylococcus aureus (strain NCTC 8325 / PS 47) OX=93061 GN=ribH PE=3 SV=1	sp|Q2FXG2|RISB_STAA8	8	16.396	1.00118	7.18268e-05	9.85411e-06	1593800000	2306700000	1362500000	1382500000	2079100000	883520000	724500000	814820000	891750000	963430000
